# Supplementary material for: Criminality and suicide: a longitudinal Swedish cohort study
Source: PubMed Central journal article supplement — BMJ Open. 2014 Feb 3;4(2):e003497. doi: 10.1136/bmjopen-2013-003497 (PMC3918990; doi:10.1136/bmjopen-2013-003497), 2014-02-03
Supplement: bmjopen-2013-003497.draft_revisions.pdf [file bmjopen-2013-003497.draft_revisions.pdf]

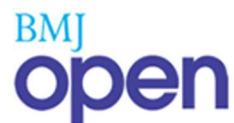

## Criminality and Suicide – A longitudinal Swedish Cohort Study

|                                 |                                                                                                                                                                                                                                                           |
|---------------------------------|-----------------------------------------------------------------------------------------------------------------------------------------------------------------------------------------------------------------------------------------------------------|
| Journal:                        | <i>BMJ Open</i>                                                                                                                                                                                                                                           |
| Manuscript ID:                  | bmjopen-2013-003497                                                                                                                                                                                                                                       |
| Article Type:                   | Research                                                                                                                                                                                                                                                  |
| Date Submitted by the Author:   | 01-Jul-2013                                                                                                                                                                                                                                               |
| Complete List of Authors:       | Stenbacka, Marlene; Karolinska Institute, Public Health<br>Sidorchuk, Anna; Karolinska Institute, Public Health Sciences<br>Romelsjö, Anders; Karolinska Institute, Public Health Sciences<br>Jokinen, Jussi; Karolinska Institute, Clinical Neuroscience |
| <b>Primary Subject Heading</b>: | Epidemiology                                                                                                                                                                                                                                              |
| Secondary Subject Heading:      | Public health, Mental health, Epidemiology, Addiction                                                                                                                                                                                                     |
| Keywords:                       | EPIDEMIOLOGY, Substance misuse < PSYCHIATRY, Suicide & self-harm < PSYCHIATRY, PUBLIC HEALTH                                                                                                                                                              |
|                                 |                                                                                                                                                                                                                                                           |

SCHOLARONE™  
Manuscripts

Peer Review Only

## Criminality and Suicide – A longitudinal Swedish Cohort Study

Stenbacka M.,<sup>1,2</sup> Sidorchuk A.,<sup>2</sup> Romelsjö A.,<sup>2</sup> Jokinen J.<sup>3</sup>)

1). Addiction Center Stockholm, S:t Eriks Hospital Polhemsgatan 60, 112 82 Stockholm, Sweden.

2). Department of Public Health Sciences, Karolinska Institute, Widerströmska Building, 171 76 Stockholm, Sweden.

3). Department of Clinical Neuroscience, Karolinska Institute, Karolinska University Hospital Solna, 171 76 Stockholm, Sweden.

**Keywords: criminality, risk factors, substance use, violence ,suicide**

**Word count: 3722 words**

## ABSTRACT

**Objectives:** This study aimed to investigate whether both violent and non-violent offending was related to elevated risk of suicide mortality in a male cohort of 49,398 18-20 years young men during a 35-years period. We also investigated if the risk was higher among those with repeated offences and how experiences of substance abuse and suicide attempt modified the relationship.

**Design:** A cohort study with a longitudinal design.

**Participants:** The cohort comprises all young men conscripted for military service in 1969/70. Possible confounders were collected at the time of conscription through interviews and two questionnaires. The cohort has been matched with official registers measuring violent and non-violent criminality and suicide mortality from 1970 and onwards. Estimates of suicide risk were calculated as hazard ratio (HR) with 95% confidence intervals (CI) using Cox proportional regression analyses with adjustment for potential confounding by family, psychological and behavioural factors including alcohol and substance use and psychiatric disorders.

**Results:** In the whole cohort, 29.04% had at least one non-violent conviction and 4.7% violent conviction. Suicide by poisoning was most prevalent in the criminal groups, while hanging in the non-criminals. In the crude model, the violent offenders had nearly five times higher hazard (HR=4.80, 3.73-6.19) to die from suicide and non-violent criminals about two (HR=2.14, 1.79-2.56). In the fully adjusted model the hazards were still significant for suicide.

**Conclusions:** Having experiences of violent or non-violent criminality were associated with increased hazard of suicide mortality. Co-morbidity with alcohol and substance use and psychiatric disorders modified the risk, but were still significant for non-violent criminals. It is crucial to identify offenders and especially repeated offenders who also suffer from alcohol or substance misuse and psychiatric illness in clinical settings in order to prevent suicide mortality.

## ARTICLE SUMMARY

### Article focus

The aim of this cohort study was to analyse the association of violent and non-violent criminality and suicide mortality in a large population based cohort of 49,398 18-20 years Swedish male conscripts and followed these for 35 years. Early covariates were collected through two questionnaires and interviews regarding psychosocial conditions including alcohol and substance use. Criminality, suicide attempt and suicide mortality were collected through official registers.

### Key messages

- Poisoning as a suicide method was most prevalent in the criminal groups, while hanging in the non-criminals.
- In Cox proportional regression analyses, the violent offenders had nearly five times higher hazard to die from suicide and non-violent criminals about two. After controlling for early covariates, the hazards still remained significant for suicide.
- Suicide attempt, severe alcohol and substance use measured at follow-up modified the risk of criminality on suicide.

### Strengths and limitations of this study

- The study is based on a large national cohort with a longitudinal design and with several adolescent covariates. Only a small part 2-3 % of the participants was excluded from the study mainly because of physical or psychiatric handicap.
- This study adds knowledge about the association between violent and non-violent criminality and suicide mortality.
- The limitations were that non-anonymous questionnaires were used, which could have affected to a lower response rate of especially problematic issues such as alcohol and substance use.

## INTRODUCTION

Almost one million people worldwide die from suicide every year[1]. Suicide was accounted for 1.8% of the total disease burden in 1998 and has been estimated to be 2.4% by 2020[2]. Further, suicide is one of the three leading causes of mortality in the age category 15-44 years and the second among those aged 15-19[3].

Earlier studies on the relationship between criminality and suicide mortality have been mostly conducted on populations in prison or newly released from prison[4]. These studies have found an elevated risk of 5 to 10 for suicide compared to the general population and more than a third of the suicide cases had a history of criminality among men[5-6].

Studies of suicide mortality among offenders who are not in prisons are rather few, but an elevated risk in this population has also been reported[7-8]. Webb et al examined various kinds of offences in a national population based study and found violent offences as the most important predictor for suicide with an odds ratio of nearly five and after adjustment for psychiatric admission, the odds decreased more than the double[6].

In a Swedish national cohort study of 992 881 young adults both female and male repeated offenders had a suicide risk of about six times higher than non-offenders (9). In the sub analyses controlled for psychiatric in-patient care and for substance abuse until the end of the follow-up, women had a risk of 3.7 and men had a risk of 3.0[9].

A suicide attempt has been considered as the strongest clinical predictor of the subsequent suicide. The suicide risk after an attempt is up to 40 times the expected rate[10], and lifetime prevalence suicide rates of suicide attempters with severe coexistent psychiatric disorder are even higher [11].

In a Swedish national register based study, it was found that patients who had attempted suicide by hanging evinced highest risk to commit suicide in one year after the attempt[12].

Studies on risk factors for suicide have stressed the importance of substance misuse for elevated mortality rates[13-14]. In most studies suicide mortality is far higher in substance users than the general population. For instance, Darke et al[15] found about one third of the substance misusers had experiences of suicide attempts. Suicide mortality among opioid misusers has been estimated to 14 times higher than the general population[10,16]. Further, one fifth or more of the suicide cases have substances presented in the blood[15].

1  
2  
3 A previous study on the Swedish conscripts with a 13-years follow-up revealed that social and  
4 behavioural factors and neurotic and personality disorder measured at conscription were most  
5 significantly associated with high rate of suicide[17]. Likewise, in a recent longitudinal study of  
6 the association between offenders and victims of violence and cause specific mortality found that  
7 suicide carried a hazard of about two after adjustment for various psychosocial covariates[13].  
8  
9 In this representative, nationwide, general population study we followed 49,398 Swedish  
10 conscripts during 35 years, in order to examine whether both violent and non-violent offending  
11 were related to elevated risk of suicide mortality. We also investigated if the risk is higher among  
12 those with repeated offences and how experiences of substance abuse and suicide attempt  
13 modified the relationship.  
14  
15  
16  
17  
18  
19  
20

21 This study aimed to address three main research questions:

- 22 (1) Do conscripts with violent or non-violent criminality differ in respect to hazards of suicide  
23 mortality?
  - 24 (2) Do suicide risk increase with repeated offences?
  - 25 (3) Do history of previous suicide attempt and/or serious substance and alcohol misuse modify the  
26 relationship between violent and non-violent criminality on suicide mortality?
  - 27 (4) Do methods of suicide differ between the criminal groups?
- 28  
29  
30  
31  
32  
33

## 34 MATERIAL AND METHODS

### 35 Participants

36 This nationwide study is based on 49,398 18-20 years young Swedish men conscripted for  
37 military service from 1 July 1969 to 30 June 1970 to 2004. About 2-3% was exempted from the  
38 military service mainly because of a congenital psychiatric or physical disorder or severe  
39 handicap. In order to get as homogenous group as possible according to age, we included 48411  
40 conscripts born 1949 to 1950. Six per cent of the conscripts were born in 1949, 18 % in 1950 and  
41 75 % in 1951. The mean age at the end of the follow-up was about 53 years of age for the  
42 survivors.  
43  
44  
45  
46  
47  
48  
49  
50  
51  
52

### 53 Measures

#### 54 Measurement of crime

55  
56  
57  
58  
59  
60

1  
2  
3 Data from the national Crime Register were used to identify date, type, and number of criminal  
4  
5 offenses. The Crime Register contains information on all convictions in Sweden from 1966 and  
6  
7 onwards. Criminality was divided in three categories: no crime, violent crime and non-violent  
8  
9 crime. Violence was defined as: homicide, manslaughter and assault and non-violent crime all the  
10  
11 other convictions. We also categorized the cohort according to number of crimes meaning for  
12  
13 violent and non-violent offenders: (0, 1, and 2 or more violent crimes).  
14  
15  
16  
17

### 18 **Measurement of potential confounders**

19  
20 Two non-anonymous questionnaires were used at the time of conscription. The first included  
21  
22 questions about family and psychosocial background and health. The second about substance use  
23  
24 including alcohol and drug use and sniffing of solvents. Studies have shown that the  
25  
26 questionnaires have been found to have sufficient validity for epidemiological studies[17-18]. The  
27  
28 included variables were family, behavioural, and psychological and health conditions measured at  
29  
30 conscription.  
31  
32

33  
34 The selection of variables was based on earlier research[13,18-21] and other studies of risk factors  
35  
36 for criminality and suicide mortality[9]. We included 11 covariates which have proved to be  
37  
38 significant in the bivariate Cox proportional regression analysis.  
39

40  
41 The covariates were: fathers' social class (social class III vs. I-II), and medication for nervous  
42  
43 problems among parents or other members in the family (yes, at least one parent or family  
44  
45 member vs. no) conduct problems at school (at least once vs. no), any prior contact with police  
46  
47 and juvenile authorities (yes at least once vs. no), having taken medication for psychiatric  
48  
49 disorder (at least once vs. no).The psychological variables, emotional control and intellectual  
50  
51 capacity, were assessed by trained military psychologist who performed a structured interview  
52  
53 with all conscripts. The psychologists combined questionnaire and interview data and the  
54  
55 measures were assessed on a 5-point Likert scale. The ratings were regularly checked for  
56  
57  
58  
59  
60

1  
2  
3 interrater reliability, which was satisfactory[22]. If the psychologist discovered or the conscript  
4 reported any psychiatric disorder, the subject was referred to a psychiatrist and an eventual  
5 diagnosis was coded according to ICD-8[17, 22]. Details of this procedure and the validity of the  
6 assessments have been described earlier[17, 23-24].  
7  
8  
9

10  
11  
12  
13  
14 The intelligence scores were based on four main intellectual and cognitive tests, measuring  
15 verbal, logical-inductive, spatial, and technical and mechanical ability. The results of the tests  
16 were aggregated in a 5-point summary score for overall intelligence, as described in detail by  
17 Ståhlberg[25] and David et al[26]. These scale of intelligence capacity was scored 1=very bad;  
18 2=bad; 3=moderate; 4=good; 5=very good and expressed as intelligence (1–3 vs. 4–5). Details of  
19 this procedure and the validity of the assessments have been described by Otto[22].  
20  
21

22  
23  
24  
25  
26  
27 Problematic alcohol use was dichotomized (yes vs. no, with yes defined as one or more of  
28 consumption of  $\geq 210$  g pure alcohol per week, having ever taken an ‘eye-opener’, being  
29 intoxicated often, having been taken into custody for public drunkenness on at least one  
30 occasion, and non-prescription drug (ever vs. never). Drug misuse was coded (yes vs. no), with  
31 yes defined as used illicit drugs 10 times or more or any intravenous drug use.  
32  
33

34  
35  
36  
37  
38 Additionally, we included three variables regarding hospitalizations (alcohol and drug misuse and  
39 attempted suicide) during the follow-up period.  
40  
41  
42

43  
44  
45 The cohort was followed through official registers and was linked at Statistics Sweden via the  
46 unique personal number for each individual, which thereafter was replaced with an individual  
47 serial number making the data anonymous to the research group, after approval of Karolinska  
48 Institute Research Ethics Committee (Dnr 2007/174-31, Dnr 2008/1086-31/5).  
49  
50  
51

## 52 53 54 55 56 **Measures of alcohol and drug misuse and suicide attempt** 57 58 59 60



1  
2  
3 Data from the National Hospital Register were used to identify inpatient care with alcohol and  
4 drug misuse according to ICD-8 and ICD-9 from 1987 and ICD-10 from 1997 onwards.

5  
6  
7 The National Hospital Register includes details concerning inpatient care stays and days at  
8 hospital and diagnoses, and has covered all public hospitals in Stockholm and Uppsala County  
9 since 1972, 85% of all Swedish public inpatient care stays since 1983, and about 98–99% since  
10 1987. The ICD classifications for hospitalization and mortality were: Drug misuse – ICD-8: 304  
11 and 965.0; ICD-9: 304, 965A, 968F, 969G and 969H; and ICD-10: F11-12, F14, F15, F16, F18,  
12 F19, O35.5, P04.4, T40.0–T40.3, T40.5–T40.9, T43.6, Z71.5, and X42. Alcohol misuse – ICD-8:  
13 291, 303, 571.00, 571.01 and 980; ICD-9: 291, 303, 305A, 357F, 425F, 535D, 571A–571D and  
14 980; and ICD-10: E24.4, F10, G31.2, G62.1, G72.1, I42.6, K29.2, K70, K86.0, O35.4, P04.3,  
15 Q86.0, T51, X45, Y91, Z50.2 and Z71.4. Suicide attempt: ICD-8 and ICD-9: Determined suicide  
16 attempt: E950-E959 and undetermined. E980-E989: ICD-10: Determined X60-X84 and  
17 undetermined suicide: Y10-Y34.

### 31 **Suicide mortality**

32 Cause of Death Register provides mortality data and covers more than 99% of all deaths  
33 occurring in Sweden and is based on information from death certificates. Suicide was classified  
34 according to ICD-8 and ICD-9: E950-E959 and ICD-10: X60-X84 or as death with undetermined intent  
35 ICD-8 and ICD-9: E980-E989 and ICD-10: Y10-Y34. The same ICD-codes as for the hospital register.

### 44 **Statistical analyses**

45 Cox proportional regression analysis was used to calculate hazard ratios (HRs) for early  
46 covariates measured at conscription in relation to time to suicide mortality. The survival time was  
47 calculated from September 1969 until time of death for those who died during 1969 (2 subjects)  
48 and from 1 January 1970 until death or until 31 December 2004 for all other subjects in the  
49 cohort.

1  
2  
3 We had no exact information whether a person had emigrated from Sweden or not during the  
4 follow-up period, while we could not censor for emigration in the calculation of person time. In  
5 order to investigate the association between the quantity of criminal offences and mortality, we  
6 categorized subjects according to committed numbers of offences (0, 1, 2 and more) in relation to  
7 the time to suicide mortality by using Cox proportional regression analysis with 95 % confidence  
8 intervals (95% CI). We adjusted for potential risk factors as described above. These were  
9 measured at the time of conscription and only measured once why the time order was difficult to  
10 prove. Some of these variables like alcohol- or substance use could act as confounders or  
11 mediators on both criminality and suicide mortality.  
12

13 A test of the proportional hazard assumption was performed for each covariate in bivariate and  
14 multivariate analyses by using a time-dependent explanatory variable. If the p-value was  
15 significant ( $p < .05$ ) the proportional hazard assumption was violated and the variable was not  
16 included in the analyses.  
17

18 We used Kaplan-Meier survival curves to plot survival probability of suicide mortality in non-  
19 criminals, violence and other criminality during the 35 years follow-up.  
20

21 Chi-squared ( $X^2$ ) test was used when calculating early covariates and hospitalization in relation to  
22 criminality (Table 1).  
23

### 24 **Sensitivity analysis**

25 We included different levels of numbers (0,1 and 2 or more) of both violent and non-violent  
26 offences in both crude and multivariate regression analyses in relation to suicide mortality (Table  
27 4).  
28

## 29 **RESULTS**

30 Of the total cohort, 2,671 (5.5%) died during the follow-up period. Of these 615 (23.6%) died due to  
31 suicide. The suicide cases were rather equally distributed during the follow-up. More than one third  
32  
33  
34  
35  
36  
37  
38  
39  
40  
41  
42  
43  
44  
45  
46  
47  
48  
49  
50  
51  
52  
53  
54  
55  
56  
57  
58  
59  
60

(34%) of the suicide cases were 30 years or younger, 31% were in the age category 31-40 years and the remaining subjects (36%) were 41 years or older. The mean age was 36 years.

Table 1 shows the distribution of 11 covariates divided into the three groups of criminals. All risk factors differed significantly ( $p < 0.0001$ ) between the groups, but mostly contact with the police or juvenile authorities ( $X^2 = 3305.72$ ,  $p < 0.0001$ ) and having had conducted problems at school ( $X^2 = 2470.41$ ,  $p < 0.0001$ ). Regarding hospitalization of alcohol or drug misuse which had occurred during the follow-up period, alcohol misuse differed most significantly between the groups ( $X^2 = 4464.28$ ,  $p < 0.0001$ ).

A history of suicide attempts ( $n = 1192$ , 2.4%) was most common in violent offenders (13.5%) followed by other criminal offenders (4.1%) and lowest among non-offenders (0.9%) ( $X^2 = 1647.76$ ,  $p < 0.0001$ ).

### **Methods of suicide**

Table 2 shows that the most common methods were intoxication and hanging, with significant risks between the groups ( $p = 0.0006$  and  $p = 0.0011$ , respectively). Poisoning was most prevalent in the two criminal groups (67% in total), while hanging was most prevalent among the non-criminals (57.7%).

### **Crude and multivariate analyses**

Violent related criminality was mostly associated with suicide (HR=4.69, 95%CI 3.56-6.19) followed by non-violent criminality (HR=2.08, 95%CI 1.72-2.52) in bivariate analyses, while after adjustment for the adolescent risk factors, the hazards decreased to nearly three and two fold respectively (Table 2). In the fully adjusted model we also included alcohol and drug inpatient care stays and suicide attempt and found elevated hazards, however only significant in non-violent offenders.

### **Repeated violent and non-violent offenders in relation to suicide mortality**

1  
2  
3 Both repeated non-violent and violent offences were associated with elevated hazards of suicide in  
4 crude analyses (HR=3.27 and HR=5.40). When adjusted for early covariates the repeaters of both  
5 violent and non-violent offenders decreased to HRs =2.42 and 2.34, respectively (Table 3).  
6  
7  
8  
9

10  
11 We conducted Kaplan-Meier survival distribution curves for the three criminal groups in relation  
12 to suicide mortality from 1970 up to 2004. We found that violent criminality were associated with  
13 lower survival than the other two criminal groups (violent and non-violent offenders and no  
14 offenders) (Fig 1).  
15  
16  
17  
18  
19

## 20 21 22 **DISCUSSION**

23 This study aimed to analyse suicide mortality in three groups of criminals: non-criminal, violent  
24 and non-violent criminal offenders. Very few earlier studies on the association between violent  
25 and non-violent criminality and suicide have been conducted in a cohort representing the general  
26 population and with a long follow-up period.  
27  
28  
29  
30  
31  
32  
33  
34  
35

36 Nearly one third of the death cases were due to suicide in those who had ever committed a violent  
37 offence and one fourth in the non-violent group, which is in line with earlier studies reporting high  
38 proportionate mortality (the percentage of the dead who died by suicide) among homicide  
39 offenders and among personality-disordered offenders subject to forensic psychiatric assessment  
40 [27-28]. Likewise, the survival for the violent criminals was lower than the other two groups.  
41  
42 The fact that suicide and suicide attempt were more frequent in the criminal groups than non-  
43 criminals could be an effect of both alcohol or other substance use but also psychiatric disorders or  
44 other negative life circumstances[29].  
45  
46  
47  
48  
49  
50  
51  
52  
53

54 Somewhat surprisingly, poisoning as the method of completed suicide was more frequent in the  
55 two criminal groups than in non-criminals, while hanging is the most common method among  
56  
57  
58  
59  
60

1  
2  
3 men in Sweden; however, to the best of our knowledge, no earlier studies have focused on the  
4  
5 choice of suicide method in relation to criminality.  
6

7  
8 In a study by Titelman et al[30] suicide by hanging or firearm was the most common methods in  
9  
10 the Nordic countries. The aggressive methods were more common among men and poisoning  
11  
12 among females. It has been argued that suicide attempts by poisoning have mostly non-fatal  
13  
14 outcome because of lower dosages after the introduction of blister packaging and often being  
15  
16 rescued by accessible emergency care[31]. In this study we found that nearly half of those who  
17  
18 had committed suicide had used poisoning as a method followed by hanging. However the  
19  
20 criminals were more likely having used poisoning and a possible explanation to our finding is that  
21  
22 alcohol and substance use was more common in the criminal groups. Even after analyses of  
23  
24 suicides with intent and uncertain intent poisoning was still the most common method in this  
25  
26 cohort and especially in the criminal groups.  
27  
28

29  
30 We found that violent offenders had nearly six times higher crude risk and non-violent offenders  
31  
32 more than two-fold higher risk for suicide mortality at the age of 30 years or older. Even after  
33  
34 controlling for multiple confounders the hazards remained significant. Alcohol and substance  
35  
36 misuse and attempted suicide in the fully adjusted model were confounding on suicide, which  
37  
38 imply a strong association between these clinical predictors and suicide risk.  
39

40  
41 Suicide attempts had been experienced by 1192 (2.4%), which could be considered as rather low  
42  
43 frequency when comparing with the completed suicides (n=615). Studies have indicated that  
44  
45 suicide attempts are up to 20 times more frequent than completed suicide[1]. We had data on only  
46  
47 suicide attempts needing inpatient care, namely serious suicide attempts, which could explain the  
48  
49 ratio. We have no knowledge about attempted suicides that not turn up as hospital records. Some  
50  
51 suicide attempters do not search help at any care givers[32-33].  
52

53  
54 In our study, one of five suicide victims had attempted suicide, indicating a strong association  
55  
56 between attempted and completed suicide. This was especially evident for violent offenders where  
57  
58  
59  
60

1  
2  
3 one in three had experienced attempted suicide. Suicide attempt has been considered as one of the  
4  
5 strongest predictors of suicide and the risk seem to be elevated up to older ages and during long  
6  
7 time periods (34). Additionally, factors as socioeconomic status and school performance are  
8  
9 important factors for suicidal behavior and suicides[35-36].  
10

11  
12 Further, the criminal offenders were more likely to have experiences of psychiatric diagnoses  
13  
14 already at the age at 18 compared to no offenders. Alcohol misuse has also in other studies been  
15  
16 pointed out as a severe risk factor for suicide and in some studies the second most common  
17  
18 diagnostic group[37]. Wilcox et al[16] found alcohol misusers having a 10-fold increase risk for  
19  
20 suicide in a mixed-age cohort. Likewise, in a longitudinal cohort study by Flensburg-Madsen et  
21  
22 al[38] individuals with alcohol use disorders had eight times higher hazards of suicide compared  
23  
24 to individuals with no alcohol use. The hazard fell to three after adjustment of psychiatric  
25  
26 disorders. In the present study, about half of the violent offenders had reported either risky alcohol  
27  
28 or substance use at the time of conscription. Whether alcohol leads to violence or vice versa seems  
29  
30 to be unclear[39]. The fact that the suicide rate is somewhat higher in the violent criminals than  
31  
32 non-violent criminals, one could assume that alcohol misuse play an important role for both  
33  
34 violence and suicide[38].  
35  
36  
37

38  
39 There is some evidence in the literature that violent criminals have higher rates of suicide, but  
40  
41 these numbers are often derived from prison populations with often difficult circumstances such as  
42  
43 overcrowded cells and spaces which contribute to psychiatric illness[40]. However, studies from  
44  
45 Scotland and Wales found that the suicide rates are also unusually high among non-custody  
46  
47 offenders when comparing to the general population[41-42].  
48  
49  
50

51  
52 One possible explanation to our finding is that alcohol and substance use is more common in the  
53  
54 criminal groups including fatal and non-fatal poisonings compared to non-criminals.  
55  
56  
57  
58  
59  
60

1  
2  
3 The yearly incidence rates of suicide mortality have not shown a clear decrease as other cause of  
4 deaths in the younger age categories in Sweden, why it is important to identify delinquency at  
5 young ages and other related risk factors in order to find preventive strategies for this group[6].  
6  
7

8  
9 There are evidence that suicide rates are high also in the older ages, often due to loneliness,  
10 anxiety disorder and depression[43]. This in turn indicates the importance of early detection and  
11 prevention strategies and treatment for substance users and especially those with suicidal  
12 tendencies[37].  
13  
14

15  
16  
17  
18  
19  
20  
21  
22  
23  
24  
25  
26  
27  
28  
29  
30  
31  
32  
33  
34  
35  
36  
37  
38  
39  
40  
41  
42  
43  
44  
45  
46  
47  
48  
49  
50  
51  
52  
53  
54  
55  
56  
57  
58  
59  
60  
Psychiatric disorders have been shown to be correlated to both violence and suicide. King and  
Barraclough[44] found 27 times higher risk of unnatural death (suicide, accident and  
undetermined) among individuals who had recently been in contact with psychiatric clinics  
compare to those who had not. Likewise, persons with psychiatric illness as schizophrenia are  
more likely to die due to suicide[45]. Further, suicide attempt has been considered as one of the  
strongest predictors of suicide and the risk seem to be elevated up to older ages and during long  
time periods[34].

### **Advantages and limitations**

An advantage of this study is the large national cohort with a longitudinal design and with several  
adolescent covariates. Only a small part 2-3 % of the conscripts was excluded from the study  
mainly because of physical or psychiatric handicap. The two questionnaires used at conscription  
were non-anonymous, which could have affected to a lower response rate of especially  
problematic issues such as alcohol and substance use. However, other studies on conscription  
cohort have compared register and self-reported information of alcohol and substance use and  
found good agreement between the different sources of data[23]. A small number of the conscripts  
missed one or some of the items in the questionnaires (Table 1). That was especially evident for  
those subjects who had committed violent offences whereas the response rate for the covariates

1  
2  
3 included in the study varied from 0.26 to 9.45%. The corresponding measures for other criminality  
4  
5 and non-criminals were: 0.20 to 6.37% and 0.13 to 4.19%. The violent offenders had probably  
6  
7 more severe risk factors than the non-violent and non-criminal groups which could have resulting  
8  
9 in underestimating of the hazards of suicide. One could assume that these subjects also had higher  
10  
11 rates of substance use and other maladjusted behaviour measured at conscription which in turn  
12  
13 could have affected the outcome[46]. However, we have no reason to believe that the risk for the  
14  
15 outcome, suicide mortality, has been considerable affected due the internal missing data.  
16  
17 Another limitation of this study is that we do not have information about criminality not turning  
18  
19 up in the register. Some subjects could have committed many violent and non-violent crimes,  
20  
21 especially in combination with substance misuse, and never been convicted of a crime.  
22  
23  
24  
25  
26

## 27 **Conclusions**

28  
29 We found that individuals registered for either violent or other criminality are at increased risk for  
30  
31 committing suicide and that is especially evident for those who were criminal repeaters. The two  
32  
33 criminal groups were more likely to commit suicide by poisoning indicating prior experiences of  
34  
35 substance misuse. Hanging was most common in the non-criminal group which has been shown to  
36  
37 be the most common method in Sweden[12]. We suggest that authorities and the health care  
38  
39 should evaluate both violent and non-violent criminals and especially those with combination of  
40  
41 alcohol and substance misuse for suicide risk.  
42  
43  
44  
45  
46

## 47 **Acknowledgements**

48  
49 We want to thank Anders Leifman for the statistical advice. **Competing interests: none.**

50  
51 **Funding:** The research for this study was supported by Co-ordination of the Swedish Drug Policy  
52  
53 (Dnr 238/2006:18) and by the Swedish Research Council (Project numbers: K2009-61P-21304-  
54  
55 04-4; K2009-61X-21305-01-1).  
56  
57  
58  
59  
60



1  
2  
3 **Contributors:** MS planned the study, conducted the statistical analyses and wrote the final  
4 version of the manuscript. AS contributed to the planning and data analyses. JJ and AR  
5 contributed to the planning of the study and preparing of the manuscript. All authors contributed  
6 to the final draft of the manuscript.  
7  
8  
9  
10

11  
12  
13  
14  
15  
16 **Ethics approval:** .Karolinska Institute Research Ethics Committee (Dnr 2007/174-31, Dnr  
17 2008/1086-31/5).  
18  
19  
20  
21  
22  
23  
24  
25  
26  
27  
28  
29  
30  
31  
32  
33  
34  
35  
36  
37  
38  
39  
40  
41  
42  
43  
44  
45  
46  
47  
48  
49  
50  
51  
52  
53  
54  
55  
56  
57  
58  
59  
60

## Reference

1. World Health Organization, World suicide prevention day 2012. <http://www.who.int/mediacentre/events/annual/world-suicide-prevention-day/en/>
2. Bertolote JM, Fleischmann A. A global perspective on the magnitude of suicide mortality. In: D Wasserman and C Wasserman (eds.). Oxford Textbook of Suicidology and Suicide Prevention: a global perspective. Oxford: Oxford University Press.2009;91-98.
3. Patton GC, Coffey C, Sawyer SM et al. Global patterns of mortality in young people: a systematic analysis of population health data. *Lancet* 2009;**374**: 881-892.
4. Karimina A, Law MG, Butler TG et al. Suicide risk among recently released prisoners in New South Wales, Australia. *Med J Aust* 2007;**18**:387-390.
5. Fazel S, Benning R, Danesh J. Suicides in male prisoners in England and Wales, 1978-2003. *Lancet* 2005;**366**:1301-2.
6. Webb R, Qin P, Stevens H. National study of suicide in all people with a criminal justice history. *Arch Gen Psychiatr* 2011;**68**,591-9.
7. Boardman AP, Grimbaldeston AH, Handley C,et. al. The North Staffordshire Suicide Study: a case-control study of suicide in one health district. *Psychol Med* 1999;**29**:27- 33.
8. Linsley KR, Johnson N, Martin J. Police contact within 3 months of suicide and associated health service contact. *Br J Psychiatry* 2007;**190**:170-1.
9. Björkenstam E, Björkenstam C, Vinnerljung B et al. Juvenile delinquency, social background-a Swedish national cohort study of 992881 young adults. *Int J Epidemiol* 2011;**40**:1585-92.
10. Harris EC, Barraclough B. Suicide as an outcome for mental disorders. A meta-analysis. *Br J Psychiatry* 1997;**170**:205-28

- 1  
2  
3 11. Tidemalm D, Långström N, Lichtenstein P. et al., Risk of suicide after suicide attempt  
4 according to coexisting psychiatric disorder: Swedish cohort study with long term follow-up. BMJ  
5 2008;**337**:a2205doi:10.1136/bmj.a2205.  
6  
7
- 8  
9 12. Runesson B, Tidemalm D, Dahlin M et al. Method of attempted suicide as predictor of  
10 subsequent successful suicide: national long term cohort study. BMJ  
11 2010;**340**:c3222doi:10.1136/bmj.c3222.  
12  
13
- 14 13. Stenbacka M, Moberg T, Romelsjö A et al. Mortality and causes of death among violent  
15 offenders and victims - a Swedish population based longitudinal study. BMC public health  
16 2012;**12**:1-10.  
17  
18
- 19 14. Darke S, Douflou J, Torok M. Toxicology and circumstances of completed  
20 suicide by means other than overdose. J Forensic Sci 2009;**54**:490-4.  
21  
22
- 23 15. Darke S, Dufrou J, Totok M. Toxicology and characteristics of fatal oxycodone toxicity cases  
24 in New South Wales, Australia 1999-2008. J Forensic Sci 2011;**56**:690-3.  
25  
26
- 27 16. Wilcox HC, Conner KR, Caine ED. Association of alcohol and drug use disorders and  
28 completed suicide: an empirical review of cohort studies. Drug Alc Depend 2004;**7**:11-19.  
29  
30
- 31 17. Allebeck P, Allgulander C, Fisher LD. Predictors of completed suicide in a cohort of 50465  
32 young men: role of personality and deviant behaviour. BMJ 1988;**297**:176-178.  
33  
34
- 35 18. Andreasson S, Allebeck P, Romelsjö A. Alcohol and mortality among young men.  
36 Longitudinal study of Swedish conscripts. Br Med J 1988;**296**:1021-5.  
37  
38
- 39 19. Eriksson A, Romelsjö A, Stenbacka M. et al. Early risk factors for criminal offending in  
40 schizophrenia: a 35-year longitudinal cohort study. Soc Psychiatr Epidemiol. 2011 **46**:925-32  
41  
42
- 43 20. Stenbacka M, Leifman L, Dalal K, et al.. Early Predictors of Injury Mortality among Swedish  
44 Conscripts: A 35-Year Follow-up Study. Accid Anal Prev 2011;**43**:228-34.  
45  
46
- 47 21. Davstad I, Allebeck P, Leifman A et al. Self-reported drug use and mortality among a  
48 nationwide sample of Swedish conscripts – A 35-year follow-up. Drug Alc Depend 2011;  
49  
50  
51  
52  
53  
54  
55  
56  
57  
58  
59  
60

1  
2  
3 **118**:383-90.

4  
5 22. Otto U: Male youths. A sociopsychiatric study of a total annual population of Swedish  
6  
7 adolescent boys. *Acta Psychiatr Scand* 1976;Suppl **264**:1-312.

8  
9  
10 23. Benson G, Holmberg MB: Validity of questionnaire in population studies on drug use. *Acta*  
11  
12 *Psychiatr Scand* 1985;**70**:9-18.

13  
14 24. Rydelius P-A. Alcohol-abusing teenage boys. *Acta Psychiatr Scand* 1983;**68**:368-80.

15  
16 25. Ståhlberg B. I-provet (intelligence test: the Swedish enlistment battery). Karlstad:  
17  
18 Militärpsykologiska Institutet.1971. (In Swedish)

19  
20 26. David AS, Malmberg L, Brandt L et al. 1997. IQ and risk for schizophrenia: a population-  
21  
22 based cohort study. *Psychol Med* 1997;**27**:1311–23.

23  
24 27. Kullgren G, Tengström A, Grann M. Suicide among personality-disordered offenders: a  
25  
26 follow-up study of 1943 male criminal offenders. *Psychiatr Epidemiol* 1998;**33**:102-6.

27  
28 28. Jokinen J, Forslund K, Nordström AL et al. Suicide risk after homicide in Sweden. *Arch*  
29  
30 *Suicide Res* 2009; **13**:297-301.

31  
32 29. Jokinen J, Forslund K, Ahnemark E et al. Karolinska Interpersonal Violence Scale predicts  
33  
34 suicide in suicide attempters. *J Clin Psychiatry* 2010; **71**:1025-1032

35  
36 30. Titelman D, Oskarsson H, Wahlbeck K et al. Suicide mortality trends in the Nordic countries  
37  
38 1980 – 2009. *Nord J Psychiatry* 2013; Early Online:1–10.23293897.

39  
40 31. Hawton K, Simkin S, Deeks J et al. UK legislation on analgesic packs: Before and after study  
41  
42 of long term effect on poisonings. *BMJ* 2004; **329**:1076.

43  
44 32. Guilherme B, Jules A, Nock MK et al. Risk factors for twelve-month suicide attempts in the  
45  
46 National Comorbidity Survey Replication (NCS-R). *Psychol Med* 2006;**36**:1747–57.

47  
48 33. De Leo D, Ester C, Kym S et al. Lifetime risk of suicide ideation and attempts in an Australian  
49  
50 community: Prevalence, suicidal process, and help-seeking behaviour. 2005;**86**:215–24.

- 1  
2  
3 34. Suominen K, Isometsa E, Suokas J et al. Completed suicide after a suicide attempt: a 37-year  
4 follow-up study. *Am J Psychiatry* 2004;**161**:562-563.  
5  
6  
7 35. Jablonska B, Lindblad F, Östberg V et al. A national cohort study of parental socioeconomic  
8 status and non-fatal suicidal behaviour-the mediating role of school performance. *BMC Public*  
9 *Health* 2012, **12**:17.  
10  
11  
12  
13 36. Pritchard C, Cox M, Dawson A. Suicide and 'violent' death in a six-year cohort of male  
14 probationers compared with pattern of mortality in the general population: evidence of  
15 accumulative socio-psychiatric vulnerability. *J R Soc Health* 1997;**117**:180- 185  
16  
17  
18  
19 37. Waern M. Alcohol dependence and abuse in elderly suicides. *Alcohol and Alcoholism*  
20 2003;**38**:249-254.  
21  
22  
23 38. Flensburg-Madsen T, Knop J, Mortensen EL et al. Alcohol use disorders increase the risk of  
24 completed suicide — Irrespective of other psychiatric disorders. A longitudinal cohort study.  
25 *Psychiatry Research* 2009;**167**:123–130.  
26  
27  
28  
29 39. Lipsey MW, Wilson DB, Cohen MA, Derzon JH: Is there a causal relationship between  
30 alcohol use and violence? A synthesis of evidence. *Recent Dev Alcohol* 1997;**13**:245-82.  
31  
32  
33 40. Sattar G, Killias M. The death of offenders in Switzerland. *Eur J Crim* 2005; **2**:317-40.  
34  
35  
36 41. Sattar G. Rates and causes of death among prisoners and offenders under community  
37 supervision. Home Office Research Study. London Home Office. 2001;231.  
38  
39  
40 42. Sattar G. The death of offenders in England and Wales. *Crisis* 2003;**24**:1:17- 23.  
41  
42  
43 43. Waern M. Risk factors for suicide in the elderly: What do we know? What do we need to find  
44 out? *Suicidologi* 2011;**16**:2:3-8.  
45  
46  
47 44. King E, Barraclough B. Violent death and mental illness: A study of a single catchment area  
48 over eight years. *Br J Psychiatry* 1990;**156**:714-20.  
49  
50  
51 45. Carlborg A, Winnerbäck K, Jönsson EG. et al. Suicide in schizophrenia. *Expert Review of*  
52 *Neurotherapeutics* 2010;**10**,1153–1164.  
53  
54  
55  
56  
57  
58  
59  
60

1  
2  
3  
4  
5  
6  
7  
8  
9  
10  
11  
12  
13  
14  
15  
16  
17  
18  
19  
20  
21  
22  
23  
24  
25  
26  
27  
28  
29  
30  
31  
32  
33  
34  
35  
36  
37  
38  
39  
40  
41  
42  
43  
44  
45  
46  
47  
48  
49  
50  
51  
52  
53  
54  
55  
56  
57  
58  
59  
60

46. Stattin H, Romelsjö R, Stenbacka M. Personal resources as modifiers of the risk for future criminality: an analysis of protective factors in relation to 18-year-old boys. *Br J Criminol* 1997;**37**:198–223

For peer review only

1  
2  
3  
4  
5  
6  
7  
8  
9  
10  
11  
12  
13  
14  
15  
16  
17  
18  
19  
20  
21  
22  
23  
24  
25  
26  
27  
28  
29  
30  
31  
32  
33  
34  
35  
36  
37  
38  
39  
40  
41  
42  
43  
44  
45  
46  
47  
48  
49  
50  
51  
52  
53  
54  
55  
56  
57  
58  
59  
60

| Table 1. Risk factors measured at conscription and hospitalization in relation to non-violent and violent criminality |          |                         |                     |                   |
|-----------------------------------------------------------------------------------------------------------------------|----------|-------------------------|---------------------|-------------------|
|                                                                                                                       | No crime | Non-violent criminality | Violent criminality | Chisq, prob.**)   |
| Fathers' social class                                                                                                 |          |                         |                     |                   |
| III                                                                                                                   | 47.67    | 50.38                   | 58.07               |                   |
| 1-II                                                                                                                  | 48.43    | 43.24                   | 32.48               | 204.72, p<0.0001  |
| Missing *)                                                                                                            | 3.90     | 6.37                    | 9.45                |                   |
| Medication for nervous problems in the family                                                                         |          |                         |                     |                   |
| Yes (parents or other family members)                                                                                 | 30.11    | 34.53                   | 40.35               |                   |
| No                                                                                                                    | 67.02    | 61.61                   | 54.11               | 201.34, p<0.0001  |
| Missing                                                                                                               | 2.88     | 3.86                    | 5.54                |                   |
| Conduct problems at school                                                                                            |          |                         |                     |                   |
| Yes (at least once)                                                                                                   | 17.69    | 33.44                   | 52.22               |                   |
| No                                                                                                                    | 81.39    | 65.05                   | 45.45               | 2470.41, p<0.0001 |
| Missing                                                                                                               | 0.92     | 1.51                    | 2.33                |                   |
| Own medication for psychiatric problems                                                                               |          |                         |                     |                   |
| Yes                                                                                                                   | 9.94     | 18.58                   | 4.56                |                   |
| No                                                                                                                    | 89.02    | 85.22                   | 77.23               | 293.35, p<0.0001  |
| Missing                                                                                                               | 1.04     | 1.68                    | 2.73                |                   |
| Emotional control                                                                                                     |          |                         |                     |                   |
| Very bad, bad                                                                                                         | 26.8     | 34.84                   | 49.89               |                   |
| Very good, good, medium                                                                                               | 72.6     | 64.12                   | 48.22               | 769.81, p<0.0001  |
| Missing                                                                                                               | 0.70     | 1.04                    | 1.89                |                   |
| IQ                                                                                                                    |          |                         |                     |                   |
| Below average                                                                                                         | 16.03    | 23.24                   | 35.69               |                   |
| Above average, average                                                                                                | 83.84    | 76.56                   | 64.04               | 764.81, p<0.0001  |
| Missing                                                                                                               | 0.13     | 0.20                    | 0.26                |                   |
| Psychiatric diagnosis (at conscription)                                                                               |          |                         |                     |                   |
| Yes (at least one diagnosis)                                                                                          | 9.73     | 15.87                   | 29.85               |                   |
| No                                                                                                                    | 88.58    | 82.06                   | 68.53               | 1008.59, p<0.0001 |
| Missing                                                                                                               | 1.69     | 2.07                    | 1.63                |                   |
| Contact with police and juvenile authorities                                                                          |          |                         |                     |                   |
| Yes (several or some times)                                                                                           | 20.77    | 39.38                   | 64.09               |                   |

|                                      |       |       |       |                    |
|--------------------------------------|-------|-------|-------|--------------------|
| No                                   | 77.86 | 58.62 | 33.14 | 3305.72, p<0.0001  |
| Missing                              | 1.37  | 2.00  | 2.77  |                    |
| Risky alcohol use                    |       |       |       |                    |
| Yes                                  | 8.29  | 19.79 | 39.60 |                    |
| No                                   | 90.43 | 78.40 | 57.58 | 2681.86, p<0.0001  |
| Missing                              | 1.28  | 1.81  | 2.91  |                    |
| Dug misuse                           |       |       |       |                    |
| Yes                                  | 1.81  | 6.49  | 10.94 |                    |
| No                                   | 94.00 | 88.53 | 82.22 | 1022, 23, p<0.0001 |
| Missing                              | 4.19  | 4.97  | 6.84  |                    |
| Sniffing                             |       |       |       |                    |
| At least once                        | 9.84  | 18.43 | 29.58 |                    |
| No                                   | 88.82 | 79.38 | 66.81 | 1234.54, p<0.0001  |
| Missing                              | 1.34  | 2.19  | 3.60  |                    |
| <b>Hospitalization</b>               |       |       |       |                    |
| Alcohol hospitalization              |       |       |       |                    |
| Yes (at least once)                  | 1.76  | 10.75 | 31.96 |                    |
| No                                   | 98.24 | 89.25 | 68.04 | 4464.28, p<.00001  |
| Drug use hospitalization             |       |       |       |                    |
| Yes (at least once)                  | 0.15  | 2.48  | 11.65 |                    |
| No                                   | 99.85 | 97.52 | 88.35 | 2269.25, p<.00001  |
| Hospitalization for suicide attempts |       |       |       |                    |
| Yes (at least once)                  | 0.94  | 4.10  | 13.54 |                    |
| No                                   | 99.06 | 95.90 | 86.46 | 1647.76, p<0.0001  |

\*)No answers were given to this item

\*\*) p-value calculated for non-missing observations



| Table 2. Distribution of methods of suicide in conscripts divided in three criminal groups |                    |          |                         |                     |                 |
|--------------------------------------------------------------------------------------------|--------------------|----------|-------------------------|---------------------|-----------------|
| Methods of suicide                                                                         |                    | No crime | Non-violent criminality | Violent criminality | Chisq, p-value  |
|                                                                                            |                    | %        | %                       | %                   |                 |
| Poisoning E950-E952, E980-E982, X60-X69, Y10-Y19                                           | Yes (n=278, 45%)   | 36.33    | 46.40                   | 17.27               | 14.72, P=0.0006 |
|                                                                                            | No (n=337, 55%)    | 51.63    | 36.50                   | 11.87               |                 |
| Hanging/suffocation: E953, E983, X70, Y20                                                  | Yes (n=149, 24%)   | 57.72    | 32.21                   | 10.07               | 13.59, P=0.0011 |
|                                                                                            | No (n=466, 76%)    | 40.56    | 43.78                   | 15.67               |                 |
| Firearm: E955, E985, X722-X74, Y422-Y424                                                   | Yes (n=69, 11.2%)  | 55.07    | 33.33                   | 11.59               | 3.37, P=0.1852  |
|                                                                                            | No (n=546, 88.8%)  | 55.07    | 33.33                   | 11.59               |                 |
| Drowning: E954, E984, X71, Y21                                                             | Yes (n=41, 7%)     | 44.43    | 41.46                   | 14.11               | 0.897, P=0.6386 |
|                                                                                            | No (n=574, 93%)    | 48.78    | 34.15                   | 17.07               |                 |
| Jump from heights: E957, E987, X80, Y30                                                    | Yes (n=27, .39%)   | 37.04    | 51.85                   | 11.11               | 1.38, P=0.4992  |
|                                                                                            | No (588, 5.61%)    | 45.07    | 40.08                   | 14.46               |                 |
|                                                                                            |                    |          |                         |                     |                 |
| Train movement: E9580, E9880, X81, Y31                                                     | Yes (n=22, 3.58%)  | 44.69    | 40.98                   | 14.33               | 0.010, P=0.9950 |
|                                                                                            | No(n=593, 96.42%)  | 45.45    | 40.91                   | 13.65               |                 |
| Cutting: E956, E986, X79, Y28                                                              | Yes (n=16, 2.6%)   | 31.25    | 62.50                   | 6.25                | 3.27, P=0.1950  |
|                                                                                            | No (=599, 97.4%)   | 45.08    | 40.40                   | 14.52               |                 |
| Others: E958-959, E988-989, X75-X77, X79, X82-X84, Y425-Y27, Y29, Y32-Y34                  | Yes (n=13, 2.11%)  | 38.46    | 38.46                   | 23.08               | 0.85, P=0.6537  |
|                                                                                            | No (n=602, 97.89%) | 44.85    | 41.03                   | 14.12               |                 |

Table 3. Criminality in relation to suicide mortality adjusted for early risk factors measured at conscription <sup>1)</sup> and in addition adjusted for alcohol and drug inpatient and suicide attempt <sup>2)</sup>.

| Suicide<br>N=615 |                |              |                 |                           |                           |
|------------------|----------------|--------------|-----------------|---------------------------|---------------------------|
| Criminality      | No. of exposed | No. of cases | HR Crude        | HR Adjusted <sup>1)</sup> | HR Adjusted <sup>2)</sup> |
| Never            | 32376          | 275          | 1.0             | 1.0                       | 1.0                       |
| Non-violent      | 14183          | 252          | 2.08, 1.72-2.52 | 1.65, 1.35- 2.01          | 1.35, 1.10- 1.67          |
| Violent          | 2275           | 88           | 4.69, 3.56-6.19 | 2.68, 1.98-3.64           | 1.30, 0.92-1.82           |

<sup>1)</sup> adjusted for fathers' social class, medication for nervous problems in the family, conduct problems at school, own medication for psychiatric disorder, contact with police and juvenile authorities, emotional control, intellectual capacity, psychiatric diagnosis at conscription, sniffing of solvents, risky alcohol misuse and substance misuse.

<sup>2)</sup> In addition adjusted for alcohol and drug inpatient and suicide attempt.

Table 4. Number of offences adjusted for early risk factors at conscription <sup>1)</sup> and in addition for alcohol and drug inpatient and suicide attempt <sup>2)</sup>.

| Suicide<br>N=615             |                 |                           |                           |
|------------------------------|-----------------|---------------------------|---------------------------|
| Criminality                  | HR Crude        | HR Adjusted <sup>1)</sup> | HR Adjusted <sup>2)</sup> |
| <b>Non-violent offence</b>   |                 |                           |                           |
| 0 offence (n=32376, 66.30%)  | 1.0             | 1.0                       | 1.0                       |
| 1 offence (n=7322, 14.99%)   | 1.46, 1.15-1.85 | 1.25, 0.96-1.63           | 1.18, 0.91-1.55           |
| 2+ offences (n=9136, 18.71%) | 3.27, 2.75-3.88 | 2.24, 1.81-2.77           | 1.49, 1.17-1.89           |
| <b>Violent offence</b>       |                 |                           |                           |
| 0 offence (n=46559, 95.34%)  | 1.0             | 1.0                       | 1.0                       |
| 1 offence (n=1556, 3.19%)    | 2.65, 1.96-3.58 | 1.83, 1.29-2.59           | 1.17, 0.82-1.67           |
| 2+ offence (n=719, 1.47%)    | 5.40, 3.94-7.39 | 2.42, 1.61-2.59           | 0.84, 0.54-1.31           |

<sup>1)</sup> adjusted for fathers' social class, medication for nervous problems in the family, conduct problems at school, own medication for psychiatric disorder, contact with police and juvenile authorities, emotional control, intellectual capacity, psychiatric diagnosis at conscription, sniffing of solvents, risky alcohol misuse and substance misuse.

<sup>2)</sup> In addition adjusted for alcohol and drug inpatient and suicide attempt.

STROBE 2007 (v4) Statement—Checklist of items that should be included in reports of cohort studies

| Section/Topic             | Item # | Recommendation                                                                                                                                                                       | Reported on page # |
|---------------------------|--------|--------------------------------------------------------------------------------------------------------------------------------------------------------------------------------------|--------------------|
| Title and abstract        | 1      | (a) Indicate the study’s design with a commonly used term in the title or the abstract                                                                                               | 1                  |
|                           |        | (b) Provide in the abstract an informative and balanced summary of what was done and what was found                                                                                  | 2                  |
| <b>Introduction</b>       |        |                                                                                                                                                                                      |                    |
| Background/rationale      | 2      | Explain the scientific background and rationale for the investigation being reported                                                                                                 | 4                  |
| Objectives                | 3      | State specific objectives, including any prespecified hypotheses                                                                                                                     | 5                  |
| <b>Methods</b>            |        |                                                                                                                                                                                      |                    |
| Study design              | 4      | Present key elements of study design early in the paper                                                                                                                              | 5                  |
| Setting                   | 5      | Describe the setting, locations, and relevant dates, including periods of recruitment, exposure, follow-up, and data collection                                                      | 5                  |
| Participants              | 6      | (a) Give the eligibility criteria, and the sources and methods of selection of participants. Describe methods of follow-up                                                           | 5                  |
|                           |        | (b) For matched studies, give matching criteria and number of exposed and unexposed                                                                                                  |                    |
| Variables                 | 7      | Clearly define all outcomes, exposures, predictors, potential confounders, and effect modifiers. Give diagnostic criteria, if applicable                                             | 8                  |
| Data sources/ measurement | 8*     | For each variable of interest, give sources of data and details of methods of assessment (measurement). Describe comparability of assessment methods if there is more than one group | 6-8                |
| Bias                      | 9      | Describe any efforts to address potential sources of bias                                                                                                                            | 5,14               |
| Study size                | 10     | Explain how the study size was arrived at                                                                                                                                            | 5                  |
| Quantitative variables    | 11     | Explain how quantitative variables were handled in the analyses. If applicable, describe which groupings were chosen and why                                                         | 8                  |
| Statistical methods       | 12     | (a) Describe all statistical methods, including those used to control for confounding                                                                                                | 8                  |
|                           |        | (b) Describe any methods used to examine subgroups and interactions                                                                                                                  | 8-9                |
|                           |        | (c) Explain how missing data were addressed                                                                                                                                          | 14-15,22           |
|                           |        | (d) If applicable, explain how loss to follow-up was addressed                                                                                                                       | 8-9                |
|                           |        | (e) Describe any sensitivity analyses                                                                                                                                                | 9                  |
| <b>Results</b>            |        |                                                                                                                                                                                      | 14-15              |

|                          |     |                                                                                                                                                                                                                                                                                                                                                                                                               |             |
|--------------------------|-----|---------------------------------------------------------------------------------------------------------------------------------------------------------------------------------------------------------------------------------------------------------------------------------------------------------------------------------------------------------------------------------------------------------------|-------------|
| Participants             | 13* | (a) Report numbers of individuals at each stage of study—eg numbers potentially eligible, examined for eligibility, confirmed eligible, included in the study, completing follow-up, and analysed<br>(b) Give reasons for non-participation at each stage<br>(c) Consider use of a flow diagram                                                                                                               |             |
| Descriptive data         | 14* | (a) Give characteristics of study participants (eg demographic, clinical, social) and information on exposures and potential confounders<br>(b) Indicate number of participants with missing data for each variable of interest<br>(c) Summarise follow-up time (eg, average and total amount)                                                                                                                |             |
| Outcome data             | 15* | Report numbers of outcome events or summary measures over time                                                                                                                                                                                                                                                                                                                                                | 8-9         |
| Main results             | 16  | (a) Give unadjusted estimates and, if applicable, confounder-adjusted estimates and their precision (eg, 95% confidence interval). Make clear which confounders were adjusted for and why they were included<br>(b) Report category boundaries when continuous variables were categorized<br>(c) If relevant, consider translating estimates of relative risk into absolute risk for a meaningful time period | 9-11, 22-26 |
| Other analyses           | 17  | Report other analyses done—eg analyses of subgroups and interactions, and sensitivity analyses                                                                                                                                                                                                                                                                                                                |             |
| <b>Discussion</b>        |     |                                                                                                                                                                                                                                                                                                                                                                                                               |             |
| Key results              | 18  | Summarise key results with reference to study objectives                                                                                                                                                                                                                                                                                                                                                      | 11          |
| <b>Limitations</b>       |     |                                                                                                                                                                                                                                                                                                                                                                                                               |             |
| Interpretation           | 20  | Give a cautious overall interpretation of results considering objectives, limitations, multiplicity of analyses, results from similar studies, and other relevant evidence                                                                                                                                                                                                                                    | 11-14       |
| Generalisability         | 21  | Discuss the generalisability (external validity) of the study results                                                                                                                                                                                                                                                                                                                                         |             |
| <b>Other information</b> |     |                                                                                                                                                                                                                                                                                                                                                                                                               |             |
| Funding                  | 22  | Give the source of funding and the role of the funders for the present study and, if applicable, for the original study on which the present article is based                                                                                                                                                                                                                                                 | 11          |

\*Give information separately for cases and controls in case-control studies and, if applicable, for exposed and unexposed groups in cohort and cross-sectional studies.

**Note:** An Explanation and Elaboration article discusses each checklist item and gives methodological background and published examples of transparent reporting. The STROBE checklist is best used in conjunction with this article (freely available on the Web sites of PLoS Medicine at <http://www.plosmedicine.org/>, Annals of Internal Medicine at <http://www.annals.org/>, and Epidemiology at <http://www.epidem.com/>). Information on the STROBE Initiative is available at [www.strobe-statement.org](http://www.strobe-statement.org).

1  
2  
3  
4  
5  
6  
7  
8  
9  
10  
11  
12  
13  
14  
15  
16  
17  
18  
19  
20  
21  
22  
23  
24  
25  
26  
27  
28  
29  
30  
31  
32  
33  
34  
35  
36  
37  
38  
39  
40  
41  
42  
43  
44  
45  
46  
47  
48  
49  
50  
51  
52  
53  
54  
55  
56  
57  
58  
59  
60

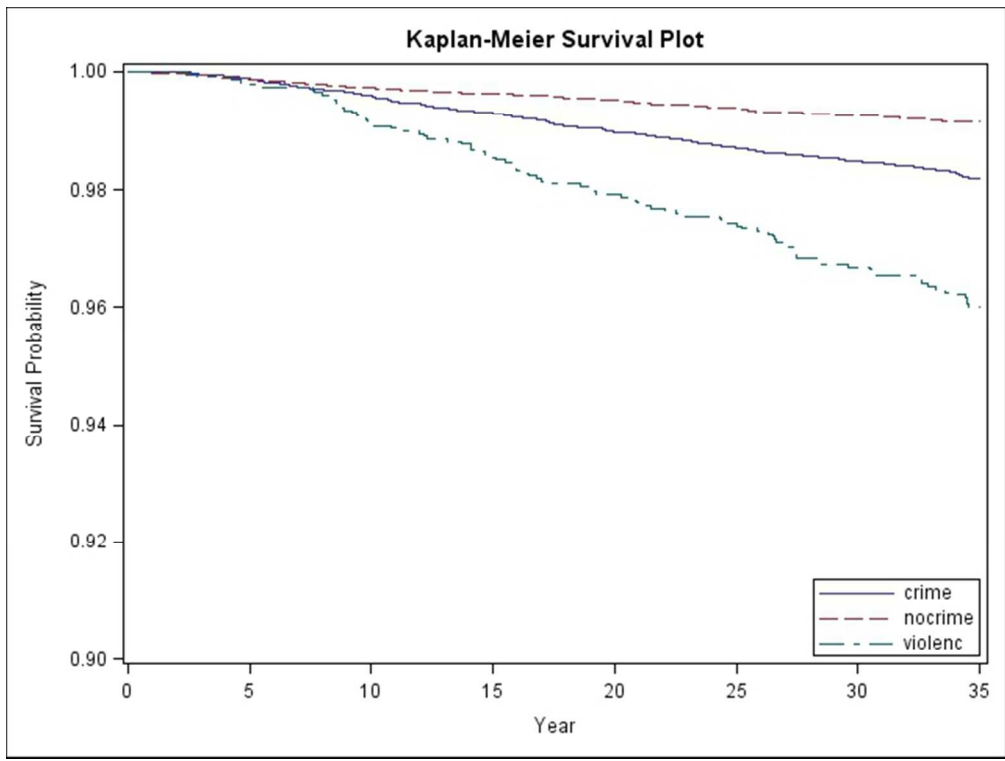

162x121mm (100 x 100 DPI)

ew only



## Criminality and Suicide – A longitudinal Swedish Cohort Study

|                                 |                                                                                                                                                                                                                                                           |
|---------------------------------|-----------------------------------------------------------------------------------------------------------------------------------------------------------------------------------------------------------------------------------------------------------|
| Journal:                        | <i>BMJ Open</i>                                                                                                                                                                                                                                           |
| Manuscript ID:                  | bmjopen-2013-003497.R1                                                                                                                                                                                                                                    |
| Article Type:                   | Research                                                                                                                                                                                                                                                  |
| Date Submitted by the Author:   | 13-Sep-2013                                                                                                                                                                                                                                               |
| Complete List of Authors:       | Stenbacka, Marlene; Karolinska Institute, Public Health<br>Sidorchuk, Anna; Karolinska Institute, Public Health Sciences<br>Romelsjö, Anders; Karolinska Institute, Public Health Sciences<br>Jokinen, Jussi; Karolinska Institute, Clinical Neuroscience |
| <b>Primary Subject Heading</b>: | Epidemiology                                                                                                                                                                                                                                              |
| Secondary Subject Heading:      | Public health, Mental health, Epidemiology, Addiction                                                                                                                                                                                                     |
| Keywords:                       | EPIDEMIOLOGY, Substance misuse < PSYCHIATRY, Suicide & self-harm < PSYCHIATRY, PUBLIC HEALTH                                                                                                                                                              |
|                                 |                                                                                                                                                                                                                                                           |

SCHOLARONE™  
Manuscripts

Peer Review Only

## Criminality and Suicide—A longitudinal Swedish Cohort Study

Stenbacka M.,<sup>1,2</sup> Sidorchuk A.,<sup>2</sup> Romelsjö A.,<sup>2</sup> Jokinen J.,<sup>3</sup>

1). Addiction Center Stockholm, S:t Eriks Hospital Polhemsgatan 60, 112 82 Stockholm, Sweden.

2). Department of Public Health Sciences, Karolinska Institute, Widerströmska Building, 171 76 Stockholm, Sweden.

3). Department of Clinical Neuroscience, Karolinska Institute, Karolinska University Hospital Solna, 171 76 Stockholm, Sweden.

**Keywords:** criminality, risk factors, substance use, violence, suicide

**Word count:** 3698



## ABSTRACT

**Objectives:** This study aimed to investigate whether both violent and non-violent offending was related to elevated risk of suicide in a male cohort of 49,398 18-20 years young men during a 35-years period. We also investigated if the risk was higher among those with repeated offences and how experiences of substance abuse and suicide attempt modified the relationship.

**Design:** A cohort study with a longitudinal design.

**Participants:** Possible confounders were obtained from a nationally representative birth cohort of 49,398 18-20 years young men who were mandatory conscripted for military service in 1969/70. The cohort has been linked to mortality and hospitalization and crime records from 1970 and onwards. Estimates of suicide risk were calculated as hazard ratio (HR) with 95% confidence intervals (CI) using Cox proportional regression analyses with adjustment for potential confounding by family, psychological and behavioural factors including alcohol and substance use and psychiatric disorders.

**Results:** In the whole cohort, 29.04% had at least one non-violent and 4.7% violent conviction. Suicide by poisoning was most prevalent in the criminal groups, while hanging in the non-criminals. In the crude model, the violent offenders had nearly five times higher risk (HR=4.80, 3.73-6.19) to die from suicide and non-violent criminals about two (HR=2.14, 1.79-2.56). In the fully adjusted model the hazard ratios were still significant for suicide.

**Conclusions:** Having experiences of violent or non-violent criminality were associated with increased risk of suicide. Co-morbidity with alcohol and substance use and psychiatric disorders modified the risk, but were still significant for non-violent criminals. It is crucial to identify offenders and especially repeated offenders who also suffer from alcohol or substance misuse and psychiatric illness in clinical settings in order to prevent suicide.

## ARTICLE SUMMARY

### Article focus

The aim of this cohort study was to analyse the association between violent and non-violent criminality and suicide in a large population based cohort of 49,398 18-20 years Swedish male conscripts followed-up for 35 years. Early confounders were collected through two questionnaires and interviews regarding psychosocial conditions including alcohol and substance use.

Criminality, suicide attempt and suicide data were collected through official registers.

### Key messages

- 1
- 2
- 3
- 4
- 5
- 6
- 7
- 8
- 9
- 10
- 11
- 12
- 13
- 14
- 15
- 16
- 17
- 18
- 19
- 20
- 21
- 22
- 23
- 24
- 25
- 26
- 27
- 28
- 29
- 30
- 31
- 32
- 33
- 34
- 35
- 36
- 37
- 38
- 39
- 40
- 41
- 42
- 43
- 44
- 45
- 46
- 47
- 48
- 49
- 50
- 51
- 52
- 53
- 54
- 55
- 56
- 57
- 58
- 59
- 60
- In Cox proportional regression analyses, the violent offenders had nearly five times higher hazard ratio to die from suicide and non-violent criminals about two. After controlling for early covariates, the hazard ratios still remained significant for suicide.
- Suicide attempt, severe alcohol and substance use measured at follow-up modified the risk of criminality on suicide.
- Poisoning as a suicide method was most prevalent in the criminal groups, while hanging in the non-criminals.

#### **Strengths and limitations of this study**

- The study is based on a large national cohort with a longitudinal design and with several adolescent confounders. Only a small part 2-3 % of the participants was excluded from the study mainly because of physical or psychiatric disorder/disability.
- This study adds knowledge about the association between violent and non-violent criminality and the risk of suicide.
- The limitations were that non-anonymous questionnaires were used, which have contributed to a lower response rate of especially problematic issues such as alcohol and substance use, but the response rate was nevertheless high.

## INTRODUCTION

Almost one million people worldwide die from suicide every year. Suicide was accounted for 1.8% of the total disease burden in 1998 and has been estimated to be 2.4% by 2020.[1] Further, suicide is one of the three leading causes of mortality in the age category 15-44 years and the second among those aged 15-19.[2]

Earlier studies on the relationship between criminality and suicide have been mostly conducted on populations in prison or newly released from prison.[3-6] Studies have found an elevated risk of 5 to 9 and in some studies much higher depending on the age group for suicide among prison inmates compared to the general population and more than a third of the suicide cases had a history of criminality among men.[5-6]

Studies of suicide among offenders who are not in prisons are rather few, but an elevated risk in this population has also been reported.[7-8] Webb et al. examined various kinds of offences in a national population based study and found violent offences as the most important predictor for suicide with an odds ratio of nearly five and after adjustment for psychiatric admission, the odds decreased more than the double.[5]

In a Swedish national cohort study of 992 881 young adults both female and male repeated offenders had a suicide risk of about six times higher than non-offenders [9]. In the sub analyses controlled for psychiatric in-patient care and for substance abuse until the end of the follow-up, women had a risk of 3.7 and men had a risk of 3.0.[9]

A suicide attempt has been considered as the strongest clinical predictor of the subsequent suicide. The suicide risk after an attempt was up to 40 times the expected rate.[10] and lifetime prevalence suicide rates of suicide attempters with severe coexistent psychiatric disorder were even higher. [11]

In a Swedish national register based study, it was found that patients who had attempted suicide by hanging evinced highest risk to commit suicide in one year after the attempt.[12]

Studies on risk factors for suicide have stressed the importance of substance misuse for elevated mortality rates.[13-14] In most studies suicide is far higher in substance users than in the general population. For instance, Darke et al.[15] found about one third of the substance misusers had experiences of suicide attempts. Suicide among opioid misusers has been estimated to 14 times higher than the general population.[10,16] Further, one fifth or more of the suicide cases have substances presented in the blood.[15]

A previous study on the Swedish conscripts with a 13-years follow-up revealed that social and behavioural factors and neurotic and personality disorder measured at conscription were most

1  
2  
3 significantly associated with high rate of suicide.[17] Likewise, in a recent longitudinal study of  
4 the association between offenders and victims of violence and cause specific mortality found that  
5 suicide carried a hazard ratio of about two after adjustment for various psychosocial confounders.  
6  
7 [13]

8  
9 In this representative, nationwide, general population study we followed 49,398 Swedish  
10 conscripts during 35 years, in order to examine whether both violent and non-violent offending  
11 were related to elevated risk of suicide. We also investigated if the risk is higher among those with  
12 repeated offences and how substance abuse and suicide attempt history modified the relationship.  
13 Moreover, we studied the choice of suicide methods for the violent and non-violent criminal  
14 groups.  
15  
16  
17  
18  
19

20  
21 This study aimed to address four main research questions:

22 (1) Do conscripts with violent or non-violent criminality differ in respect to hazard ratio of  
23 suicide?  
24

25 (2) Does suicide risk increase with repeated offences?  
26

27 (3) Does history of previous suicide attempt and/or serious substance and alcohol misuse modify  
28 the relationship between violent and non-violent criminality on suicide?  
29

30 (4) Do methods of suicide risks differ between the criminal groups?  
31  
32  
33

## 34 MATERIAL AND METHODS

### 35 Participants

36 This nationwide study is based on 49,398 18-20 years young Swedish men conscripted for  
37 military service from 1 July 1969 to 30 June 1970 to 2004. About 2-3% was exempted from the  
38 military service mainly because of a physical or psychiatric disorder/disability. In order to get a  
39 homogenous age group we included 48,411 conscripts born 1949 to 1950. Six per cent of the  
40 conscripts were born in 1949, 18 % in 1950 and 75 % in 1951. The mean age at the end of the  
41 follow-up was about 53 years of age for the survivors.  
42  
43  
44  
45  
46  
47  
48  
49  
50

### 51 Measures

#### 52 Measurement of potential confounders

53  
54  
55  
56  
57  
58  
59  
60

1  
2  
3 At conscription, each conscript was asked to answer two non-anonymous voluntary  
4 questionnaires. The first included questions about family and psychosocial background and  
5 health. The second about substance use including alcohol and drug use and sniffing of solvents.  
6  
7 Studies have shown that the questionnaires have been found to have sufficient validity for  
8 epidemiological studies[17-18].  
9

10  
11 Besides the measures of substance use, the confounders were selected from the conscription data,  
12 based on the scientific studies and earlier studies of this cohort.[9,13,18-21] We included  
13 11 confounders which have proved to be significant in the bivariate Cox proportional regression  
14 analysis.  
15

16  
17 The confounders were: Fathers' social class (social class III vs. I-II). Medication for nervous  
18 problems among parents or other members in the family (yes, at least one parent or family  
19 member vs. no). Conduct problems at school (at least once vs. no). Any prior contact with police  
20 and juvenile authorities (yes at least once vs. no). Having taken medication for psychiatric  
21 disorder (at least once vs. no).  
22

23  
24 The psychological variables were: Emotional control and intellectual ability were assessed by  
25 trained military psychologist who performed a structured interview with all conscripts. The  
26 psychologists used both questionnaire and interview data and the measures were assessed on a 5-  
27 point Likert scale. The ratings were regularly checked for interrater reliability, which was  
28 satisfactory.[22] If the psychologist discovered or the conscript reported any psychiatric disorder,  
29 the subject was referred to a psychiatrist and an eventual diagnosis was coded according to ICD-  
30 8.[17, 22] Details of this procedure and the validity of the assessments have been described  
31 earlier.[17, 23-24]  
32

33  
34 Intellectual ability (IQ) was based on four main intellectual and cognitive tests, measuring verbal,  
35 logical-inductive, spatial, and technical and mechanical ability. The results of the tests were  
36 aggregated in a 5-point summary score for overall intelligence, as described in detail by  
37  
38  
39  
40  
41  
42  
43  
44  
45  
46  
47  
48  
49  
50  
51  
52  
53  
54  
55  
56  
57  
58  
59  
60

1  
2  
3 Ståhlberg[25] and David et al.[26] These scale of intelligence capacity was scored 1=very bad;  
4  
5 2=bad; 3=moderate; 4=good; 5=very good and expressed as intelligence (1–3 vs. 4–5). Details of  
6  
7 this procedure and the validity of the assessments have been described by Otto.[22]

8  
9  
10 Problematic alcohol use was dichotomized (yes vs. no, with yes defined as one or more of  
11  
12 consumption of  $\geq 210$  g pure alcohol per week, having ever taken an ‘eye-opener’, being  
13  
14 intoxicated often, having been taken into custody for public drunkenness on at least one  
15  
16 occasion, and non-prescription drug (ever vs. never). Drug misuse was coded (yes vs. no), with  
17  
18 yes defined as used illicit drugs 10 times or more or any intravenous drug use.  
19

### 20 21 **Measures of alcohol and drug misuse and suicide attempt**

22  
23 Data from the National Swedish inpatient register were used to identify inpatient care with alcohol  
24  
25 and drug misuse according to ICD-8 and ICD-9 from 1987 and ICD-10 from 1997 onwards.

26  
27 The register includes details concerning inpatient care stays and days at hospital and diagnoses,  
28  
29 and has covered all public hospitals in Stockholm and Uppsala County since 1972, 85% of all  
30  
31 Swedish public inpatient care stays since 1983, and about 98–99% since 1987. The ICD  
32  
33 classifications for hospitalization and mortality were: Drug misuse – ICD-8: 304 and 965.0; ICD-  
34  
35 9: 304, 965A, 968F, 969G and 969H; and ICD-10: F11-12, F14, F15, F16, F18, F19, O35.5,  
36  
37 P04.4, T40.0–T40.3, T40.5–T40.9, T43.6, Z71.5, and X42. Alcohol misuse – ICD-8: 291, 303,  
38  
39 571.00, 571.01 and 980; ICD-9: 291, 303, 305A, 357F, 425F, 535D, 571A–571D and 980; and  
40  
41 ICD-10: E24.4, F10, G31.2, G62.1, G72.1, I42.6, K29.2, K70, K86.0, O35.4, P04.3, Q86.0, T51,  
42  
43 X45, Y91, Z50.2 and Z71.4. Suicide attempt: ICD-8 and ICD- 9: Determined suicide attempt:  
44  
45 E950-E959 and undetermined E980-E989; ICD-10: Determined X60-X84 and undetermined  
46  
47 suicide attempt: Y10-Y34.  
48  
49

### 50 51 **Suicide**

52  
53 Cause of Death Register provides mortality data and covers more than 99% of all deaths  
54  
55 occurring in Sweden and is based on information from death certificates. Suicide was classified  
56  
57  
58  
59  
60

1  
2  
3 according to ICD-8 and ICD-9: E950-E959 and ICD-10: X60-X84 or as death with undetermined  
4  
5 intent ICD-8 and ICD-9: E980-E989 and ICD-10: Y10-Y34. The same ICD-codes as for the  
6  
7 hospital register.  
8

### 9 10 **Measurement of crime**

11 Data from the National Crime Register were used to identify date, type, and number of criminal  
12  
13 offenses. The Crime Register contains information on all convictions in Sweden from 1966 and  
14  
15 onwards. Criminality was divided in three categories: no crime, violent crime and non-violent  
16  
17 crime. Violence was defined as: homicide, manslaughter and assault and non-violent crime all the  
18  
19 other convictions. We also categorized the cohort according to number of crimes meaning for  
20  
21 violent and non-violent offenders: (0, 1, and 2 or more crimes).  
22  
23

24 The data was linked at Statistics Sweden (Statistiska Centralbyrån) via the unique personal  
25  
26 number for each individual, which thereafter was replaced with an individual serial number  
27  
28 making the data anonymous to the research group, after approval of Karolinska Institute.  
29  
30

### 31 32 **Statistical analyses**

33 Cox proportional bivariate and multivariate regression analysis was used to calculate hazard ratios  
34  
35 (HRs) with 95% confidence intervals (95% CI) for violent and non-violent criminality and  
36  
37 suicide. We adjusted for early confounders measured at conscription in relation to time to  
38  
39 suicide. The survival time was calculated from September 1969 until time of death for those who  
40  
41 died during 1969 (2 subjects) and from 1 January 1970 until death or until 31 December 2004 for  
42  
43 all other subjects in the cohort.  
44  
45

46 We had no exact information whether a person had emigrated from Sweden or not during the  
47  
48 follow-up period, therefore we could not censor for emigration in the calculation of person time.  
49  
50

51 In order to investigate the association between the number of criminal offences and mortality, we  
52  
53 categorized subjects according to committed numbers of offences (0, 1, 2 and more) in relation to  
54  
55 the time to suicide by using Cox proportional regression analysis. We adjusted for potential risk  
56  
57  
58  
59  
60



1  
2  
3 factors as described above. These were measured at the time of conscription and only measured  
4  
5 once why the time order was difficult to prove. Some of these variables like alcohol- or substance  
6  
7 use could act as confounders or mediators on both criminality and suicide.  
8

9  
10 A test of the proportional hazard assumption was performed for each confounder in bivariate and  
11  
12 multivariate analyses by using a time-dependent explanatory variable. If the p-value was  
13  
14 significant ( $p < .05$ ) the proportional hazard assumption was violated and the variable was not  
15  
16 included in the analyses.  
17

18  
19 We used Kaplan-Meier survival curves to plot survival probability of suicide in non-criminals,  
20  
21 violence and other criminality during the 35 years follow-up.  
22

23  
24 Chi-square ( $X^2$ ) test was used when calculating early confounders and hospitalization in relation  
25  
26 to criminality.  
27

## 28 29 **RESULTS**

30  
31 Of the total cohort, 2,671 (5.5%) died during the follow-up period. Of these 615 (23.6%) died due to  
32  
33 suicide (474 determined and 141 undetermined). Suicide was prevalent in the criminal groups: no  
34  
35 criminality (4.11%), non-violent (7.25%) and violent criminality (13.67%).  
36  
37

38  
39 The suicide cases were rather equally distributed throughout the 35 years follow-up period.

40  
41 More than one third (34%) of the suicide cases were 30 years or younger, 30% were in the age  
42  
43 category 31-40 years and the remaining subjects (36%) were 41 years or older. The mean age was 36  
44  
45 years.  
46

47  
48 Table 1 shows the distribution of 11 confounders measured at conscription divided into the three  
49  
50 groups of criminals. All risk factors differed significantly ( $p < 0.0001$ ) between the groups, but mostly  
51  
52 contact with the police or juvenile authorities, and having had conducted problems at school.  
53

54  
55 Regarding hospitalization of alcohol or drug misuse which had occurred during the follow-up period,  
56  
57 alcohol misuse differed most significantly between the groups.  
58  
59  
60



### Methods of suicide

Poisoning was the most prevalent method of suicide (n=278) followed by hanging and suffocation (n=149) (Table 2). The violent offenders had nearly seven times higher hazard to die from poisoning (HR=6.92, 95%CI 4.91-9.76), while the non-criminal group had twice lower risk (HR=2.94, 95%CI 2.26-3.81). The violent group had three times higher hazard ratio to die due to shooting by firearm, while the non-violent group had no significant risk.

### Crude and multivariate analyses

Violent related criminality was mostly associated with suicide (HR=4.69, 95%CI 3.56-6.19) followed by non-violent criminality (HR=2.08, 95%CI 1.72-2.52) in bivariate analyses, while after adjustment for multiple confounders, the hazard ratios decreased to nearly three and two fold respectively (Table 3). In the fully adjusted model we also included alcohol and drug inpatient care stays and suicide attempt and found elevated hazard ratios, however, only significant in non-violent offenders.

### Repeated violent and non-violent offenders in relation to suicide

Both repeated non-violent and violent offences were associated with elevated hazard ratios of suicide in crude analyses (HR=3.27 and HR=5.40). When adjusted for early confounders the repeaters of both violent and non-violent offenders decreased to HRs=2.42 and 2.34, respectively (Table 4).

We conducted Kaplan-Meier survival distribution curves for the three criminal groups in relation to suicide from 1970 up to 2004. We found that violent criminality was associated with lower survival (Fig 1).

## DISCUSSION

This study aimed to analyse suicide in three groups concerning criminal offences: non-criminal, violent and non-violent criminal offenders.

1  
2  
3 We found that nearly one third of the death cases were due to suicide in those who had ever  
4 committed a violent offence and one fourth in the non-violent group, which is in line with earlier  
5 studies reporting high proportionate mortality (the percentage of the dead who died by suicide)  
6 among homicide offenders and among personality-disordered offenders subject to forensic  
7 psychiatric assessment.[27-29]  
8  
9

10  
11  
12  
13  
14 The main finding was that violent offenders had nearly five times higher crude risk and non-  
15 violent offenders more than two-fold higher risk for suicide compared to no criminals. Even after  
16 controlling for multiple confounders measured at conscription the hazard ratios remained  
17 significant. Alcohol and substance misuse and attempted suicide in the fully adjusted model were  
18 confounding on suicide remaining barely significant or non-significant risk for suicide. This imply  
19 a strong association between these clinical predictors and suicide risk.[11,30] However, we do not  
20 have knowledge about the time order between criminality and the clinical factors measured during  
21 the follow-up period, why we have to take the results with cautions.  
22  
23  
24  
25  
26  
27  
28  
29  
30

31  
32 We found that poisoning as method of completed suicide was most prevalent in violent and non-  
33 violent criminals, while hanging was the most prevalent method among non-criminals. That was  
34 also the case for men in the whole of Sweden.[31] In a Danish national register study of 9708  
35 suicide cases and 188,134 age and gender matched living controls, hanging was the leading  
36 suicide method among men, while poisoning among women.[32-33] One possible explanation to  
37 the high prevalence of poisoning in criminals in our study could be that alcohol and substance use  
38 was more prevalent in the criminal groups including fatal and non-fatal poisonings compared to  
39 non-criminals.  
40  
41  
42  
43  
44  
45  
46  
47  
48  
49

50  
51  
52 There is some evidence in the literature that violent criminals have higher rates of suicide, but  
53 these numbers are often derived from prison populations with often difficult circumstances such as  
54 overcrowded cells and spaces which may contribute to psychiatric illness.[34] Very few earlier  
55  
56  
57  
58  
59  
60

1  
2  
3 studies on the association between violent and non-violent criminality and suicide have been  
4  
5 conducted in a cohort representing the general population and with a long follow-up period.

6  
7 However, national data from England and Wales found after age standardization, 9- to 13-fold  
8  
9 increased risk for suicide in both prisoners and non-custody offenders.[34]

10  
11 The yearly incidence rates of suicide have not shown a clear decrease in the younger age  
12  
13 categories in Sweden, why it is important to identify delinquency at young ages and other risk  
14  
15 factors in order to find preventive strategies for this group.[5] Generally, suicide rates are higher  
16  
17 among the older age groups, often due to loneliness, anxiety disorder and depression.[35-36] In  
18  
19 this study, the suicide cases were rather equally distributed throughout the 35 years follow-up  
20  
21 period which probably means that all age categories seem to be vulnerable for suicide.  
22  
23

24  
25 It has been argued that suicide attempts by poisoning nowadays have mostly non-fatal outcome  
26  
27 because of lower dosages after the introduction of blister packaging and often being rescued by  
28  
29 accessible emergency care [37-38], indicating the importance of analysing both licit and illicit  
30  
31 drugs involving in suicide. As mentioned above the criminal groups are more likely to use illicit  
32  
33 drugs and additionally alcohol and prescribed drugs.[11, 35]

34  
35  
36 Suicide attempts had been experienced by 1192 men (2.4%), which could be considered as rather  
37  
38 low frequency when comparing with the completed suicides (n=615). An American national  
39  
40 study (National Survey on Drug Use and Health), based on interviews and web-questionnaires  
41  
42 from 92,264 respondents in year 2008 and 2009, found one suicide case for every 25 attempted  
43  
44 suicides.[39] We had data on only suicide attempts needing inpatient care, namely serious suicide  
45  
46 attempts, which could explain the ratio. We did not have data on attempted suicides that not turn  
47  
48 up as hospital records. Some suicide attempters do not search help at any care givers.[40-41]. In  
49  
50 our study, one out of five suicide victims had attempted suicide, confirming a strong association  
51  
52 between attempted and completed suicide. This was especially evident for violent offenders where  
53  
54 one in three had experienced attempted suicide. Suicide attempt has been considered as one of the  
55  
56  
57  
58  
59  
60

1  
2  
3 strongest predictors of suicide and the risk seem to be elevated up to older ages and during long  
4  
5 time periods.[42] Alcohol misuse has also in other studies been pointed out as a severe risk factor  
6  
7 for suicide and in some studies the second most common diagnostic group.[35,43]. Wilcox et  
8  
9 al.[16] found alcohol misusers having a 10-fold increase risk for suicide in a mixed-age cohort.  
10  
11 Likewise, in a longitudinal cohort study by Flensburg-Madsen et al.,[44] individuals with alcohol  
12  
13 use disorders had eight times higher hazard ratios of suicide compared to individuals with no  
14  
15 alcohol use. The hazard ratio fell to three after adjustment of psychiatric disorders. These findings  
16  
17 indicate the importance of early detection and prevention strategies and treatment for substance  
18  
19 users and especially those with suicidal tendencies in all ages.[36] In the present study, about half  
20  
21 of the violent offenders had reported either risky alcohol or substance use at the time of  
22  
23 conscription and nearly one third had been treated at hospital for an alcohol related diagnosis. The  
24  
25 relationship between alcohol use and violence seems to be complex.[45] The fact that the suicide  
26  
27 rate is somewhat higher in the violent criminals than non-violent criminals, one could assume that  
28  
29 alcohol misuse play an important role for both violence and suicide [43].  
30  
31  
32

33  
34 We found that one third of the violent offenders were already diagnosed at conscription with a  
35  
36 psychiatric diagnosis. Psychiatric disorders are strongly related to suicide risk, whereas the  
37  
38 association between mental illness and violent crime is not as evident. King and Barraclough[45]  
39  
40 found 27 times higher risk of unnatural death (suicide, accident and undetermined) among  
41  
42 individuals who had recently been in contact with psychiatric clinics compare to those who had  
43  
44 not. Persons with severe psychiatric disorders like affective disorder and schizophrenia have  
45  
46 highly elevated lifetime suicide risk.[46-47]  
47  
48

### 49 **Advantages and limitations**

50  
51 An advantage of this study is the large national cohort with a longitudinal design and with several  
52  
53 adolescent covariates. Only a small part 2-3 % of the conscripts was excluded from the study  
54  
55 mainly because of physical or psychiatric disorders. The two questionnaires used at conscription  
56  
57  
58  
59  
60

1  
2  
3 were non-anonymous, which could have contributed to a lower response rate of especially  
4  
5 problematic issues such as alcohol and substance use. However, other studies on conscription  
6  
7 cohort have compared register and self-reported information of alcohol and substance use and  
8  
9 found good agreement between the different sources of data [23]. A small number of the  
10  
11 conscripts missed one or some of the items in the questionnaires. That was especially evident for  
12  
13 those subjects who had committed violent offences whereas the response rate for the confounders  
14  
15 included in the study varied from 0.26 to 9.45%. The corresponding measures for other criminality  
16  
17 and non-criminals were: 0.20 to 6.37% and 0.13 to 4.19%. The violent offenders had probably  
18  
19 more severe risk factors than the non-violent and non-criminal groups which could have resulting  
20  
21 in underestimating of the hazard ratios of suicide. One could assume that these subjects also had  
22  
23 higher rates of substance use and other maladjusted behaviour measured at conscription which in  
24  
25 turn could have affected the outcome.[48] However, we have no reason to believe that the risk for  
26  
27 the outcome, suicide, has been considerable affected due the internal missing data.  
28  
29

30  
31 Another limitation of this study is that we do not have information about criminality not turning  
32  
33 up in the register. Some subjects could have committed many violent and non-violent crimes,  
34  
35 especially in combination with substance misuse, and never been convicted of a crime.  
36  
37

### 38 **Conclusions**

39  
40 We found that individuals registered for either violent or other criminality are at increased risk for  
41  
42 committing suicide in crude analysis and that is especially evident for those who were criminal  
43  
44 repeaters. However, after adjusting for confounders measured at conscription the risk was still  
45  
46 elevated and just slightly significant or non-significant in the fully adjusted model including  
47  
48 hospitalization due to alcohol and substance misuse and suicide attempt. The two criminal groups  
49  
50 were more likely to commit suicide by poisoning indicating prior experiences of substance misuse.  
51  
52 Hanging was most prevalent in the non-criminal group which is in line with the general population  
53  
54 in Sweden [31]. We suggest that authorities and the health care should observe the increased risk  
55  
56  
57  
58  
59  
60

1  
2  
3 for suicide in both violent and non-violent criminals, especially those with earlier suicide attempt  
4  
5 and comorbid alcohol and substance misuse.  
6

7 **Acknowledgements** We want to thank statistician Anders Leifman for the valuable statistical  
8  
9 advice.  
10

11 **Competing interests:** none.  
12

13  
14 **Funding:** The research for this study was supported by Co-ordination of the Swedish Drug Policy  
15  
16 (Dnr 238/2006:18), by the Swedish Research Council (Project numbers: K2009-61P-21304-04-4;  
17  
18 K2009-61X-21305-01-1) and through the regional agreement on medical training and clinical  
19  
20 research (ALF) between Stockholm County Council and Karolinska Institutet, Stockholm Centre  
21  
22 for Psychiatric Research and Education.  
23

24  
25 **Contributors:** MS planned the study, conducted the statistical analyses and wrote the final  
26  
27 version of the manuscript. AS contributed to the planning and data analyses. JJ and AR  
28  
29 contributed to the planning of the study and preparing of the manuscript. All authors contributed  
30  
31 to the final draft of the manuscript.  
32

33  
34 **Ethics approval:** Karolinska Institute Research Ethics Committee (Dnr 2007/174-31, Dnr  
35  
36 2008/1086-31/5).  
37  
38  
39  
40  
41  
42  
43  
44  
45  
46  
47  
48  
49  
50  
51  
52  
53  
54  
55  
56  
57  
58  
59  
60

## Reference

1. World Health Organization, World suicide prevention day 2012. <http://www.who.int/mediacentre/events/annual/world-suicide-prevention-day/en/>
1. Bertolote JM, Fleischmann A. A global perspective on the magnitude of suicide mortality. In: D Wasserman and C Wasserman (eds.). Oxford Textbook of Suicidology and Suicide Prevention: a global perspective. Oxford: Oxford University Press.2009;91-98.
2. Patton GC, Coffey C, Sawyer SM et al. Global patterns of mortality in young people: a systematic analysis of population health data. *Lancet* 2009;**374**: 881-892.
3. Karimina A, Law MG, Butler TG et al. Suicide risk among recently released prisoners in New South Wales, Australia. *Med J Aust* 2007;**18**:387-390.
4. Fazel S, Benning R, Danesh J. Suicides in male prisoners in England and Wales, 1978-2003. *Lancet* 2005;**366**:1301-2.
5. Webb R, Qin P, Stevens H. National study of suicide in all people with a criminal justice history. *Arch Gen Psychiatr* 2011;**68**,591-9.
6. Hayes LM. National study of jail suicides: seven year later. *Psychiatr Q* 1989;**60**:7-29.
7. Boardman AP, Grimbaldeston AH, Handley C. et. al. The North Staffordshire Suicide Study: a case-control study of suicide in one health district. *Psychol Med* 1999;**29**:27- 33.
8. Linsley KR, Johnson N, Martin J. Police contact within 3 months of suicide and associated health service contact. *Br J Psychiatry* 2007;**190**:170-1.
9. Björkenstam E, Björkenstam C, Vinnerljung B et al. Juvenile delinquency, social background-a Swedish national cohort study of 992881 young adults. *Int J Epidemiol* 2011;**40**:1585-92.
10. Harris EC, Barraclough B. Suicide as an outcome for mental disorders. A meta-analysis. *Br J Psychiatry* 1997;**170**:205-28.

- 1  
2  
3 11. Tidemalm D, Långström N, Lichtenstein P. et al., Risk of suicide after suicide attempt  
4 according to coexisting psychiatric disorder: Swedish cohort study with long term follow-up. BMJ  
5 2008;**337**:a2205doi:10.1136/bmj.a2205.  
6  
7
- 8  
9 12. Runeson B, Tidemalm D, Dahlin M et al. Method of attempted suicide as predictor of  
10 subsequent successful suicide: national long term cohort study. BMJ 2010;  
11  
12 **340**:c3222doi:10.1136/bmj.c3222.  
13  
14
- 15 13. Stenbacka M, Moberg T, Romelsjö A et al. Mortality and causes of death among violent  
16 offenders and victims - a Swedish population based longitudinal study. BMC public health  
17 2012;**12**:1-10.  
18  
19
- 20 14. Darke S, Douflou J, Torok M. Toxicology and circumstances of completed  
21 suicide by means other than overdose. J Forensic Sci 2009;**54**:490-4.  
22  
23
- 24 15. Darke S, Dufrou J, Totok M. Toxicology and characteristics of fatal oxycodone toxicity cases  
25 in New South Wales, Australia 1999-2008. J Forensic Sci 2011;**56**:690-3.  
26  
27
- 28 16. Wilcox HC, Conner KR, Caine ED. Association of alcohol and drug use disorders and  
29 completed suicide: an empirical review of cohort studies. Drug Alc Depend 2004;**7**:11-19.  
30  
31
- 32 17. Allebeck P, Allgulander C, Fisher LD. Predictors of completed suicide in a cohort of 50465  
33 young men: role of personality and deviant behaviour. BMJ 1988;**297**:176-178.  
34  
35
- 36 18. Andreasson S, Allebeck P, Romelsjö A. Alcohol and mortality among young men.  
37 Longitudinal study of Swedish conscripts. Br Med J 1988;**296**:1021-5.  
38  
39
- 40 19. Eriksson A, Romelsjö A, Stenbacka M. et al. Early risk factors for criminal offending in  
41 schizophrenia: a 35-year longitudinal cohort study. Soc Psychiatr Epidemiol. 2011 **46**:925-32.  
42  
43
- 44 20. Stenbacka M, Leifman L, Dalal K, et al.. Early Predictors of Injury Mortality among Swedish  
45 Conscripts:A 35-Year Follow-up Study. Accid Anal Prev 2011;**43**:228-34.  
46  
47
- 48 21. Davstad I, Allebeck P, Leifman A et al. Self-reported drug use and mortality among a  
49 nationwide sample of Swedish conscripts – A 35-year follow-up. Drug Alc Depend 2011;  
50  
51  
52  
53  
54  
55  
56  
57  
58  
59  
60



1  
2  
3 **118**:383-90.

4  
5 22. Otto U: Male youths. A sociopsychiatric study of a total annual population of Swedish  
6  
7 adolescent boys. *Acta Psychiatr Scand* 1976;Suppl **264**:1-312.

8  
9  
10 23. Benson G, Holmberg MB: Validity of questionnaire in population studies on drug use. *Acta*  
11  
12 *Psychiatr Scand* 1985;**70**:9-18.

13  
14 24. Rydelius P-A. Alcohol-abusing teenage boys. *Acta Psychiatr Scand* 1983;**68**:368-80.

15  
16 25. Ståhlberg B. I-provet (intelligence test: the Swedish enlistment battery). Karlstad.  
17  
18 Militärpsykologiska Institutet. 1971. (In Swedish)

19  
20 26. David AS, Malmberg L, Brandt L et al. 1997. IQ and risk for schizophrenia: a population-  
21  
22 based cohort study. *Psychol Med* 1997;**27**:1311–23.

23  
24 27. Kullgren G, Tengström A, Grann M. Suicide among personality-disordered offenders: a  
25  
26 follow-up study of 1943 male criminal offenders. *Psychiatr Epidemiol* 1998;**33**:102-6.

27  
28 28. Jokinen J, Forslund K, Nordström AL et al. Suicide risk after homicide in Sweden. *Arch*  
29  
30 *Suicide Res* 2009; **13**:297-301.

31  
32 29. Jokinen J, Forslund K, Ahnemark E et al. Karolinska Interpersonal Violence Scale predicts  
33  
34 suicide in suicide attempters. *J Clin Psychiatry* 2010; **71**:1025-1032.

35  
36 30. Waern M. Risk factors for suicide in the elderly: What do we know? What do we need to find  
37  
38 out? *Suicidologi* 2011;**16**:2:3-8.

39  
40 31. National Board on Health and Welfare, The Cause of Death Register, 2012.

41  
42 32. Webb RT, Qin P, Stevens H, Shaw J, Appleby L, Mortensen PB. National study of suicide  
43  
44 method in violent criminal offenders. *J Affect Disord* 2013; [[http://dx.doi.org/](http://dx.doi.org/10.1016/j.jad.2013.04.001)  
45  
46  
47  
48  
49  
50 10.1016/j.jad.2013.04.001].

51  
52 33. Titelman D, Oskarsson H, Wahlbeck K et al. Suicide mortality trends in the Nordic countries  
53  
54 1980–2009. *Nord J Psychiatry* 2013;1–10.23293897.

- 1  
2  
3 34. Sattar G. Rates and causes of death among prisoners and offenders under community  
4 supervision. Home Office Research Study. London Home Office. 2001;231.  
5  
6  
7 35. Waern M. Alcohol dependence and abuse in elderly suicides. Alcohol and Alcoholism  
8 2003;38:249-254.  
9  
10  
11 36. Whiteford HA, Degenhardt L, Rehm J et al. Global burden of disease attributable to mental  
12 and substance use disorders: findings from the Global Burden of Disease Study 2010.  
13 Lancet 2013;28. doi:pii: S0140-6736(13)61611-6. 10.1016/S0140-6736(13)61611-6  
14  
15  
16 37. Hawton K, Simkin S, Deeks J et al. UK legislation on analgesic packs: Before and after study  
17 of long term effect on poisonings. BMJ 2004; **329**:1076.  
18  
19  
20  
21 38. Hawton K, Bergen H, Simkin S et al. Long term effect of reduced pack sizes of paracetamol  
22 on poisoning deaths and liver transplant activity in England and Wales: interrupted time series  
23 analyses. BMJ 2013: 346, f403. doi:10.1136/bmj.f403.  
24  
25  
26  
27 39. Crosby AE, Han B, Ortega LAG et al. Suicidal thoughts and behaviors among adults aged  $\geq 18$   
28 years-United States, 2008-2009. MMWR Surveillance Summaries 2011;60(no. SS-13).  
29  
30  
31  
32 40. Guilherme B, Jules A, Nock MK et al. Risk factors for twelve-month suicide attempts in the  
33 National Comorbidity Survey Replication (NCS-R). Psychol Med 2006;**36**:1747-57.  
34  
35  
36  
37 41. De Leo D, Ester C, Kym S et al. Lifetime risk of suicide ideation and attempts in an Australian  
38 community: Prevalence, suicidal process, and help-seeking behaviour. 2005;**86**:215-24.  
39  
40  
41  
42 42. Suominen K, Isometsa E, Suokas J et al. Completed suicide after a suicide attempt: a 37-year  
43 follow-up study. Am J Psychiatry 2004;**161**:562-563.  
44  
45  
46  
47 43. Flensburg-Madsen T, Knop J, Mortensen EL et al. Alcohol use disorders increase the risk of  
48 completed suicide—Irrespective of other psychiatric disorders. A longitudinal cohort study.  
49 Psychiatry Research 2009;**167**:123-130.  
50  
51  
52  
53 44. Lipsey MW, Wilson DB, Cohen MA, Derzon JH: Is there a causal relationship between  
54 alcohol use and violence? A synthesis of evidence. Recent Dev Alcohol 1997;**13**:245-82.  
55  
56  
57  
58  
59  
60

- 1  
2  
3 45. King E, Barraclough B. Violent death and mental illness: A study of a single catchment area  
4  
5 over eight years. *Br J Psychiatry* 1990;**156**:714-20.  
6  
7 46. Carlborg A, Winnerbäck K, Jönson EG. et al. Suicide in schizophrenia. *Expert Review of*  
8  
9 *Neurotherapeutics* 2010;**10**,1153–1164.  
10  
11 47. Nordentoft M, Mortensen PB, Pedersen CB. Absolute risk of suicide after first hospital contact  
12  
13 in mental disorder. *Arch Gen Psychiatry*. 2011;**68**(10):1058-64.  
14  
15 48. Stattin H, Romelsjö R, Stenbacka M. Personal resources as modifiers of the risk for future  
16  
17 criminality: an analysis of protective factors in relation to 18-year-old boys. *Br J Criminol*  
18  
19 1997;**37**:198–223.  
20  
21  
22  
23  
24  
25  
26  
27  
28  
29  
30  
31  
32  
33  
34  
35  
36  
37  
38  
39  
40  
41  
42  
43  
44  
45  
46  
47  
48  
49  
50  
51  
52  
53  
54  
55  
56  
57  
58  
59  
60

Table 1. Risk factors and hospitalization in relation to non-violent and violent criminality

|                                               | No crime | Non-violent criminality | Violent criminality | Chisq, prob.**)   |
|-----------------------------------------------|----------|-------------------------|---------------------|-------------------|
| Fathers' social class                         |          |                         |                     |                   |
| III                                           | 47.67    | 50.38                   | 58.07               |                   |
| I-II                                          | 48.43    | 43.24                   | 32.48               | 204.72, p<0.0001  |
| Missing *)                                    | 3.90     | 6.37                    | 9.45                |                   |
| Medication for nervous problems in the family |          |                         |                     |                   |
| Yes (parents or other family members)         | 30.11    | 34.53                   | 40.35               |                   |
| No                                            | 67.02    | 61.61                   | 54.11               | 201.34, p<0.0001  |
| Missing                                       | 2.88     | 3.86                    | 5.54                |                   |
| Conduct problems at school                    |          |                         |                     |                   |
| Yes (at least once)                           | 17.69    | 33.44                   | 52.22               |                   |
| No                                            | 81.39    | 65.05                   | 45.45               | 2470.41, p<0.0001 |
| Missing                                       | 0.92     | 1.51                    | 2.33                |                   |
| Own medication for psychiatric problems       |          |                         |                     |                   |
| Yes                                           | 9.94     | 18.58                   | 45.6                |                   |
| No                                            | 89.02    | 85.22                   | 77.23               | 293.35, p<0.0001  |
| Missing                                       | 1.04     | 1.68                    | 2.73                |                   |

|                                                 |       |       |       |                   |
|-------------------------------------------------|-------|-------|-------|-------------------|
| Emotional control                               |       |       |       |                   |
| Very bad, bad                                   | 26.8  | 34.84 | 49.89 |                   |
| Very good, good, medium                         | 72.6  | 64.12 | 48.22 | 769.81, p<0.0001  |
| Missing                                         | 0.70  | 1.04  | 1.89  |                   |
| IQ                                              |       |       |       |                   |
| Below average                                   | 16.03 | 23.24 | 35.69 |                   |
| Above average, average                          | 83.84 | 76.56 | 64.04 | 764.81, p<0.0001  |
| Missing                                         | 0.13  | 0.20  | 0.26  |                   |
| Psychiatric diagnosis (at<br>conscription)      |       |       |       |                   |
| Yes (at least one diagnosis)                    | 9.73  | 15.87 | 29.85 |                   |
| No                                              | 88.58 | 82.06 | 68.53 | 1008.59, p<0.0001 |
| Missing                                         | 1.69  | 2.07  | 1.63  |                   |
| Contact with police and<br>juvenile authorities |       |       |       |                   |
| Yes (several or some times)                     | 20.77 | 39.38 | 64.09 |                   |
| No                                              | 77.86 | 58.62 | 33.14 | 3305.72, p<0.0001 |
| Missing                                         | 1.37  | 2.00  | 2.77  |                   |
| Risky alcohol use                               |       |       |       |                   |
| Yes                                             | 8.29  | 19.79 | 39.60 |                   |
| No                                              | 90.43 | 78.40 | 57.58 | 2681.86, p<0.0001 |
| Missing                                         | 1.28  | 1.81  | 2.91  |                   |
| Dug misuse                                      |       |       |       |                   |
| Yes                                             | 1.81  | 6.49  | 10.94 |                   |

|                                         |       |       |       |                    |
|-----------------------------------------|-------|-------|-------|--------------------|
| No                                      | 94.00 | 88.53 | 82.22 | 1022, 23, p<0.0001 |
| Missing                                 | 4.19  | 4.97  | 6.84  |                    |
| Sniffing                                |       |       |       |                    |
| At least once                           | 9.84  | 18.43 | 29.58 |                    |
| No                                      | 88.82 | 79.38 | 66.81 | 1234.54, p<0.0001  |
| Missing                                 | 1.34  | 2.19  | 3.60  |                    |
| <b>Hospitalization</b>                  |       |       |       |                    |
| Alcohol hospitalization                 |       |       |       |                    |
| Yes (at least once)                     | 1.76  | 10.75 | 31.96 |                    |
| No                                      | 98.24 | 89.25 | 68.04 | 4464.28, p<.00001  |
| Drug use hospitalization                |       |       |       |                    |
| Yes (at least once)                     | 0.15  | 2.48  | 11.65 |                    |
| No                                      | 99.85 | 97.52 | 88.35 | 2269.25, p<.00001  |
| Hospitalization for<br>suicide attempts |       |       |       |                    |
| Yes (at least once)                     | 0.94  | 4.10  | 13.54 |                    |
| No                                      | 99.06 | 95.90 | 86.46 | 1647.76, p<0.0001  |

\*) No answers were given to this item

\*\*) p-value calculated for non-missing observations

1  
2  
3  
4  
5  
6  
7  
8  
9  
10  
11  
12  
13  
14  
15  
16  
17  
18  
19  
20  
21  
22  
23  
24  
25  
26  
27  
28  
29  
30  
31  
32  
33  
34  
35  
36  
37  
38  
39  
40  
41  
42  
43  
44  
45  
46  
47  
48  
49  
50  
51  
52  
53  
54  
55  
56  
57  
58  
59  
60

| Suicide methods related to violent and non-violent criminality. Cox proportional regression analyses. |                   |                   |
|-------------------------------------------------------------------------------------------------------|-------------------|-------------------|
| Methods of suicide                                                                                    | Crime             | HR , 95% CI       |
| Poisoning (n=278):<br>E950-E952, E980-E982, X60-X69, Y10-Y19                                          | No crime          | 1.0               |
|                                                                                                       | Non-violent crime | 2.94, 2.26-3.81   |
|                                                                                                       | Violent crime     | 6.92, 4.91-9.76   |
| Hanging/suffocation (n=149): E953, E983, X70, Y20                                                     | No crime          | 1.0               |
|                                                                                                       | Non-violent crime | 1.28, 0.90-1.83   |
|                                                                                                       | Violent crime     | 2.54, 1.47-4.40   |
| Firearm (n=69):<br>E955,E985, X722-X74, Y422-Y424                                                     | No crime          | 1.0               |
|                                                                                                       | Non-violent crime | 1.39, 0.83-2.34   |
|                                                                                                       | Violent crime     | 3.08, 1.44-6.60   |
| Drowning (n=41):<br>E954, E984, X71,Y21                                                               | No crime          | 1.0               |
|                                                                                                       | Non-violent crime | 1.62, 0.82-3.20   |
|                                                                                                       | Violent crime     | 5.17, 2.19-12.24  |
| Jump from heights (n=27):<br>E957, E987, X80, Y30                                                     | No crime          | 1.0               |
|                                                                                                       | Non-violent crime | 3.23,1.43-7.26    |
|                                                                                                       | Violent crime     | 4.41, 1.21-16.00  |
| Moving train (n=22):<br>E9580, E9880, X81, Y31                                                        | No crime          | 1.0               |
|                                                                                                       | Non-violent crime | 2.07, 0.84- 5.10  |
|                                                                                                       | Violent crime     | 4.40, 1.21- 15.98 |
| Cutting (n=16):<br>E956, E986,X79,Y28                                                                 | No crime          | 1.0               |
|                                                                                                       | Non-violent crime | 4.61, 1.58-13.50  |
|                                                                                                       | Violent crime     | 2.95, 0.35-25.23  |
| Others (n=13):<br>E958-959,E988-989, X75-X77, X79, X82-X84, Y425-Y27, Y29, Y32-Y34                    | No crime          | 1.0               |
|                                                                                                       | Non-violent crime | 2.32, 0.67-8.01   |
|                                                                                                       | Violent crime     | 8.99, 2.15-37.63  |

1  
2  
3  
4  
5  
6  
7  
8  
9  
10  
11  
12  
13  
14  
15  
16  
17  
18  
19  
20  
21  
22  
23  
24  
25  
26  
27  
28  
29  
30  
31  
32  
33  
34  
35

| Table 3. Criminality in relation to suicide adjusted for early risk factors measured at conscription <sup>1)</sup> and in addition adjusted for alcohol and drug inpatient and suicide attempt <sup>2)</sup> . |                |              |                 |                           |                           |
|----------------------------------------------------------------------------------------------------------------------------------------------------------------------------------------------------------------|----------------|--------------|-----------------|---------------------------|---------------------------|
| Suicide                                                                                                                                                                                                        |                |              |                 |                           |                           |
| N=615                                                                                                                                                                                                          |                |              |                 |                           |                           |
| Criminality                                                                                                                                                                                                    | No. of exposed | No. of cases | HR Crude        | HR Adjusted <sup>1)</sup> | HR Adjusted <sup>2)</sup> |
| Never                                                                                                                                                                                                          | 32376          | 275          | 1.0             | 1.0                       | 1.0                       |
| Non-violent                                                                                                                                                                                                    | 14183          | 252          | 2.08, 1.72-2.52 | 1.65, 1.35- 2.01          | 1.35, 1.10- 1.67          |
| Violent                                                                                                                                                                                                        | 2275           | 88           | 4.69, 3.56-6.19 | 2.68, 1.98-3.64           | 1.30, 0.92-1.82           |

36  
37  
38  
39  
40  
41  
42  
43  
44

<sup>1)</sup> adjusted for fathers' social class, medication for nervous problems in the family, conduct problems at school, own medication for psychiatric disorder, contact with police and juvenile authorities, emotional control, intellectual capacity, psychiatric diagnosis at conscription, sniffing of solvents, risky alcohol misuse and substance misuse.

45  
46  
47  
48  
49  
50  
51  
52  
53  
54  
55  
56  
57  
58  
59  
60

<sup>2)</sup> In addition adjusted for alcohol and drug inpatient and suicide attempt.



Table 4. Number of offences adjusted for early risk factors at conscription <sup>1)</sup> and in addition for alcohol and drug inpatient and suicide attempt <sup>2)</sup>.

| Suicide                      |                 |                           |                           |
|------------------------------|-----------------|---------------------------|---------------------------|
| N=615                        |                 |                           |                           |
| Criminality                  | HR Crude        | HR Adjusted <sup>1)</sup> | HR Adjusted <sup>2)</sup> |
| Non-violent offence          |                 |                           |                           |
| 0 offence (n=32376, 66.30%)  | 1.0             | 1.0                       | 1.0                       |
| 1 offence (n=7322, 14.99%)   | 1.46, 1.15-1.85 | 1.25, 0.96-1.63           | 1.18, 0.91-1.55           |
| 2+ offences (n=9136, 18.71%) | 3.27, 2.75-3.88 | 2.24, 1.81-2.77           | 1.49, 1.17-1.89           |
| Violent offence              | HR Crude        | HR Adjusted <sup>1)</sup> | HR Adjusted <sup>2)</sup> |
| 0 offence (n=46559, 95.34%)  | 1.0             | 1.0                       | 1.0                       |
| 1 offence (n=1556, 3.19%)    | 2.65, 1.96-3.58 | 1.83, 1.29-2.59           | 1.17, 0.82-1.67           |
| 2+ offence (n=719, 1.47%)    | 5.40, 3.94-7.39 | 2.42, 1.61-2.59           | 0.84, 0.54-1.31           |

<sup>1)</sup> adjusted for fathers' social class, medication for nervous problems in the family, conduct problems at school, own medication for psychiatric disorder, contact with police and juvenile

1  
2  
3 authorities, emotional control, intellectual capacity, psychiatric diagnosis at conscription, sniffing  
4  
5 of solvents, risky alcohol misuse and substance misuse.  
6  
7

8  
9  
10 2) In addition adjusted for alcohol and drug inpatient and suicide attempt.  
11  
12  
13  
14  
15  
16  
17  
18  
19  
20  
21  
22  
23  
24  
25  
26  
27  
28  
29  
30  
31  
32  
33  
34  
35  
36  
37  
38  
39  
40  
41  
42  
43  
44  
45  
46  
47  
48  
49  
50  
51  
52  
53  
54  
55  
56  
57  
58  
59  
60

For peer review only

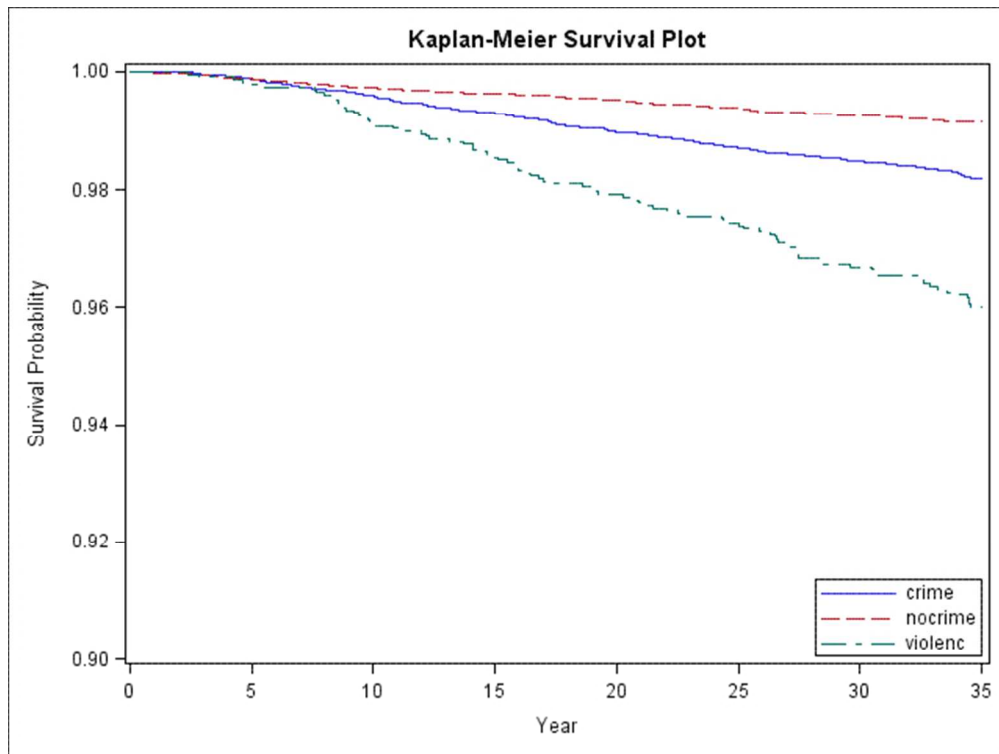

225x169mm (72 x 72 DPI)

Review only

1  
2  
3  
4  
5  
6  
7  
8  
9  
10  
11  
12  
13  
14  
15  
16  
17  
18  
19  
20  
21  
22  
23  
24  
25  
26  
27  
28  
29  
30  
31  
32  
33  
34  
35  
36  
37  
38  
39  
40  
41  
42  
43  
44  
45  
46  
47  
48  
49  
50  
51  
52  
53  
54  
55  
56  
57  
58  
59  
60

STROBE 2007 (v4) Statement—Checklist of items that should be included in reports of *cohort studies*

| Section/Topic                | Item # | Recommendation                                                                                                                                                                       | Reported on page # |
|------------------------------|--------|--------------------------------------------------------------------------------------------------------------------------------------------------------------------------------------|--------------------|
| Title and abstract           | 1      | (a) Indicate the study's design with a commonly used term in the title or the abstract                                                                                               | 1                  |
|                              |        | (b) Provide in the abstract an informative and balanced summary of what was done and what was found                                                                                  | 2                  |
| <b>Introduction</b>          |        |                                                                                                                                                                                      |                    |
| Background/rationale         | 2      | Explain the scientific background and rationale for the investigation being reported                                                                                                 | 4                  |
| Objectives                   | 3      | State specific objectives, including any prespecified hypotheses                                                                                                                     | 5                  |
| <b>Methods</b>               |        |                                                                                                                                                                                      |                    |
| Study design                 | 4      | Present key elements of study design early in the paper                                                                                                                              | 5                  |
| Setting                      | 5      | Describe the setting, locations, and relevant dates, including periods of recruitment, exposure, follow-up, and data collection                                                      | 5                  |
| Participants                 | 6      | (a) Give the eligibility criteria, and the sources and methods of selection of participants. Describe methods of follow-up                                                           | 5                  |
|                              |        | (b) For matched studies, give matching criteria and number of exposed and unexposed                                                                                                  |                    |
| Variables                    | 7      | Clearly define all outcomes, exposures, predictors, potential confounders, and effect modifiers. Give diagnostic criteria, if applicable                                             | 8                  |
| Data sources/<br>measurement | 8*     | For each variable of interest, give sources of data and details of methods of assessment (measurement). Describe comparability of assessment methods if there is more than one group | 6-8                |
| Bias                         | 9      | Describe any efforts to address potential sources of bias                                                                                                                            | 5,14               |
| Study size                   | 10     | Explain how the study size was arrived at                                                                                                                                            | 5                  |
| Quantitative variables       | 11     | Explain how quantitative variables were handled in the analyses. If applicable, describe which groupings were chosen and why                                                         | 8                  |
| Statistical methods          | 12     | (a) Describe all statistical methods, including those used to control for confounding                                                                                                | 8                  |
|                              |        | (b) Describe any methods used to examine subgroups and interactions                                                                                                                  | 8-9                |
|                              |        | (c) Explain how missing data were addressed                                                                                                                                          | 14-15,22           |
|                              |        | (d) If applicable, explain how loss to follow-up was addressed                                                                                                                       | 8-9                |
|                              |        | (e) Describe any sensitivity analyses                                                                                                                                                | 9                  |
| <b>Results</b>               |        |                                                                                                                                                                                      | 14-15              |

|                          |     |                                                                                                                                                                                                                                                                                                                                                                                                               |             |
|--------------------------|-----|---------------------------------------------------------------------------------------------------------------------------------------------------------------------------------------------------------------------------------------------------------------------------------------------------------------------------------------------------------------------------------------------------------------|-------------|
| Participants             | 13* | (a) Report numbers of individuals at each stage of study—eg numbers potentially eligible, examined for eligibility, confirmed eligible, included in the study, completing follow-up, and analysed<br>(b) Give reasons for non-participation at each stage<br>(c) Consider use of a flow diagram                                                                                                               |             |
| Descriptive data         | 14* | (a) Give characteristics of study participants (eg demographic, clinical, social) and information on exposures and potential confounders<br>(b) Indicate number of participants with missing data for each variable of interest<br>(c) Summarise follow-up time (eg, average and total amount)                                                                                                                |             |
| Outcome data             | 15* | Report numbers of outcome events or summary measures over time                                                                                                                                                                                                                                                                                                                                                | 8-9         |
| Main results             | 16  | (a) Give unadjusted estimates and, if applicable, confounder-adjusted estimates and their precision (eg, 95% confidence interval). Make clear which confounders were adjusted for and why they were included<br>(b) Report category boundaries when continuous variables were categorized<br>(c) If relevant, consider translating estimates of relative risk into absolute risk for a meaningful time period | 9-11, 22-26 |
| Other analyses           | 17  | Report other analyses done—eg analyses of subgroups and interactions, and sensitivity analyses                                                                                                                                                                                                                                                                                                                |             |
| <b>Discussion</b>        |     |                                                                                                                                                                                                                                                                                                                                                                                                               |             |
| Key results              | 18  | Summarise key results with reference to study objectives                                                                                                                                                                                                                                                                                                                                                      | 11          |
| <b>Limitations</b>       |     |                                                                                                                                                                                                                                                                                                                                                                                                               |             |
| Interpretation           | 20  | Give a cautious overall interpretation of results considering objectives, limitations, multiplicity of analyses, results from similar studies, and other relevant evidence                                                                                                                                                                                                                                    | 11-14       |
| Generalisability         | 21  | Discuss the generalisability (external validity) of the study results                                                                                                                                                                                                                                                                                                                                         |             |
| <b>Other information</b> |     |                                                                                                                                                                                                                                                                                                                                                                                                               |             |
| Funding                  | 22  | Give the source of funding and the role of the funders for the present study and, if applicable, for the original study on which the present article is based                                                                                                                                                                                                                                                 | 11          |

\*Give information separately for cases and controls in case-control studies and, if applicable, for exposed and unexposed groups in cohort and cross-sectional studies.

**Note:** An Explanation and Elaboration article discusses each checklist item and gives methodological background and published examples of transparent reporting. The STROBE checklist is best used in conjunction with this article (freely available on the Web sites of PLoS Medicine at <http://www.plosmedicine.org/>, Annals of Internal Medicine at <http://www.annals.org/>, and Epidemiology at <http://www.epidem.com/>). Information on the STROBE Initiative is available at [www.strobe-statement.org](http://www.strobe-statement.org).

## Criminality and Suicide—A longitudinal Swedish Cohort Study

Stenbacka M.,<sup>1,2</sup> Sidorchuk A.,<sup>2</sup> Romelsjö A.,<sup>2</sup> Jokinen J.,<sup>3</sup>

1). Addiction Center Stockholm, S:t Eriks Hospital Polhemsgatan 60, 112 82 Stockholm, Sweden.

2). Department of Public Health Sciences, Karolinska Institute, Widerströmska Building, 171 76 Stockholm, Sweden.

3). Department of Clinical Neuroscience, Karolinska Institute, Karolinska University Hospital Solna, 171 76 Stockholm, Sweden.

**Keywords:** criminality, risk factors, substance use, violence, suicide

**Word count:** 3698

## ABSTRACT

**Objectives:** This study aimed to investigate whether both violent and non-violent offending was related to elevated risk of suicide in a male cohort of 49,398 18-20 years young men during a 35-years period. We also investigated if the risk was higher among those with repeated offences and how experiences of substance abuse and suicide attempt modified the relationship.

**Design:** A cohort study with a longitudinal design.

**Participants:** Possible confounders were obtained from a nationally representative birth cohort of 49,398 18-20 years young men who were mandatory conscripted for military service in 1969/70

The cohort has been linked to mortality and hospitalization and crime records from 1970 and

onwards. Estimates of suicide risk were calculated as hazard ratio (HR) with 95% confidence intervals (CI) using Cox proportional regression analyses with adjustment for potential confounding by family, psychological and behavioural factors including alcohol and substance use and psychiatric disorders.

**Results:** In the whole cohort, 29.04% had at least one non-violent and 4.7% violent conviction.

Suicide by poisoning was most prevalent in the criminal groups, while hanging in the non-criminals. In the crude model, the violent offenders had nearly five times higher risk (HR=4.80, 3.73-6.19) to die from suicide and non-violent criminals about two (HR=2.14, 1.79-2.56). In the fully adjusted model the hazard ratios were still significant for suicide.

**Conclusions:** Having experiences of violent or non-violent criminality were associated with increased risk of suicide. Co-morbidity with alcohol and substance use and psychiatric disorders modified the risk, but were still significant for non-violent criminals. It is crucial to identify offenders and especially repeated offenders who also suffer from alcohol or substance misuse and psychiatric illness in clinical settings in order to prevent suicide.

## ARTICLE SUMMARY

### Article focus

The aim of this cohort study was to analyse the association between violent and non-violent criminality and suicide in a large population based cohort of 49,398 18-20 years Swedish male conscripts followed-up for 35 years. Early confounders were collected through two questionnaires and interviews regarding psychosocial conditions including alcohol and substance use.

Criminality, suicide attempt and suicide data were collected through official registers.

### Key messages

Formatted: Highlight

Formatted: Highlight

- 1
- 2
- 3
- 4
- 5
- 6
- 7
- 8
- 9
- 10
- 11
- 12
- 13
- 14
- 15
- 16
- 17
- 18
- 19
- 20
- 21
- 22
- 23
- 24
- 25
- 26
- 27
- 28
- 29
- 30
- 31
- 32
- 33
- 34
- 35
- 36
- 37
- 38
- 39
- 40
- 41
- 42
- 43
- 44
- 45
- 46
- 47
- 48
- 49
- 50
- 51
- 52
- 53
- 54
- 55
- 56
- 57
- 58
- 59
- 60
- In Cox proportional regression analyses, the violent offenders had nearly five times higher hazard ratio to die from suicide and non-violent criminals about two. After controlling for early covariates, the hazard ratios still remained significant for suicide.
- Suicide attempt, severe alcohol and substance use measured at follow-up modified the risk of criminality on suicide.
- Poisoning as a suicide method was most prevalent in the criminal groups, while hanging in the non-criminals.

#### Strengths and limitations of this study

- The study is based on a large national cohort with a longitudinal design and with several adolescent confounders. Only a small part 2-3 % of the participants was excluded from the study mainly because of physical or psychiatric disorder/disability.
- This study adds knowledge about the association between violent and non-violent criminality and the risk of suicide.
- The limitations were that non-anonymous questionnaires were used, which have contributed to a lower response rate of especially problematic issues such as alcohol and substance use, but the response rate was nevertheless high.



## INTRODUCTION

Almost one million people worldwide die from suicide every year. Suicide was accounted for 1.8% of the total disease burden in 1998 and has been estimated to be 2.4% by 2020.[1] Further, suicide is one of the three leading causes of mortality in the age category 15-44 years and the second among those aged 15-19.[2]

Earlier studies on the relationship between criminality and suicide have been mostly conducted on populations in prison or newly released from prison.[3-6] Studies have found an elevated risk of 5 to 9 and in some studies much higher depending on the age group for suicide among prison inmates compared to the general population and more than a third of the suicide cases had a history of criminality among men.[5-6]

Studies of suicide among offenders who are not in prisons are rather few, but an elevated risk in this population has also been reported.[7-8] Webb et al. examined various kinds of offences in a national population based study and found violent offences as the most important predictor for suicide with an odds ratio of nearly five and after adjustment for psychiatric admission, the odds decreased more than the double.[5]

In a Swedish national cohort study of 992 881 young adults both female and male repeated offenders had a suicide risk of about six times higher than non-offenders [9]. In the sub analyses controlled for psychiatric in-patient care and for substance abuse until the end of the follow-up, women had a risk of 3.7 and men had a risk of 3.0.[9]

A suicide attempt has been considered as the strongest clinical predictor of the subsequent suicide. The suicide risk after an attempt was up to 40 times the expected rate.[10] and lifetime prevalence suicide rates of suicide attempters with severe coexistent psychiatric disorder were even higher. [11]

In a Swedish national register based study, it was found that patients who had attempted suicide by hanging evinced highest risk to commit suicide in one year after the attempt.[12]

Studies on risk factors for suicide have stressed the importance of substance misuse for elevated mortality rates.[13-14] In most studies suicide is far higher in substance users than in the general population. For instance, Darke et al.[15] found about one third of the substance misusers had experiences of suicide attempts. Suicide among opioid misusers has been estimated to 14 times higher than the general population.[10,16] Further, one fifth or more of the suicide cases have substances presented in the blood.[15]

A previous study on the Swedish conscripts with a 13-years follow-up revealed that social and behavioural factors and neurotic and personality disorder measured at conscription were most

1  
2  
3  
4  
5  
6  
7 significantly associated with high rate of suicide.[17] Likewise, in a recent longitudinal study of  
8 the association between offenders and victims of violence and cause specific mortality found that  
9 suicide carried a hazard ratio of about two after adjustment for various psychosocial confounders.  
10 [13]

11  
12 In this representative, nationwide, general population study we followed 49,398 Swedish  
13 conscripts during 35 years, in order to examine whether both violent and non-violent offending  
14 were related to elevated risk of suicide. We also investigated if the risk is higher among those with  
15 repeated offences and how substance abuse and suicide attempt history modified the relationship.  
16 Moreover, we studied the choice of suicide methods for the violent and non-violent criminal  
17 groups.  
18  
19  
20  
21

22 This study aimed to address four main research questions:

- 23  
24 (1) Do conscripts with violent or non-violent criminality differ in respect to hazard ratio of  
25 suicide?  
26  
27 (2) Does suicide risk increase with repeated offences?  
28  
29 (3) Does history of previous suicide attempt and/or serious substance and alcohol misuse modify  
30 the relationship between violent and non-violent criminality on suicide?  
31  
32 (4) Do methods of suicide risks differ between the criminal groups?  
33

## 34 MATERIAL AND METHODS

### 35 Participants

36 This nationwide study is based on 49,398 18-20 years young Swedish men conscripted for  
37 military service from 1 July 1969 to 30 June 1970 to 2004. About 2-3% was exempted from the  
38 military service mainly because of a physical or psychiatric disorder/disability. In order to get a  
39 homogenous age group we included 48,411 conscripts born 1949 to 1950. Six per cent of the  
40 conscripts were born in 1949, 18 % in 1950 and 75 % in 1951. The mean age at the end of the  
41 follow-up was about 53 years of age for the survivors.  
42  
43  
44  
45  
46  
47

### 48 Measures

#### 49 Measurement of potential confounders

50  
51  
52  
53  
54  
55  
56  
57  
58  
59  
60

Formatted: Highlight

1  
2  
3  
4  
5  
6  
7 At conscription, each conscript was asked to answer two non-anonymous voluntary  
8 questionnaires. The first included questions about family and psychosocial background and  
9 health. The second about substance use including alcohol and drug use and sniffing of solvents.  
10  
11 Studies have shown that the questionnaires have been found to have sufficient validity for  
12 epidemiological studies[17-18].

13 Besides the measures of substance use, the confounders were selected from the conscription data,  
14 based on the scientific studies and earlier studies of this cohort.[9,13,18-21] We included  
15 11 confounders which have proved to be significant in the bivariate Cox proportional regression  
16 analysis.

17 The confounders were: Fathers' social class (social class III vs. I-II). Medication for nervous  
18 problems among parents or other members in the family (yes, at least one parent or family  
19 member vs. no). Conduct problems at school (at least once vs. no). Any prior contact with police  
20 and juvenile authorities (yes at least once vs. no). Having taken medication for psychiatric  
21 disorder (at least once vs. no).

22 The psychological variables were: Emotional control and intellectual ability were assessed by  
23 trained military psychologist who performed a structured interview with all conscripts. The  
24 psychologists used both questionnaire and interview data and the measures were assessed on a 5-  
25 point Likert scale. The ratings were regularly checked for interrater reliability, which was  
26 satisfactory.[22] If the psychologist discovered or the conscript reported any psychiatric disorder,  
27 the subject was referred to a psychiatrist and an eventual diagnosis was coded according to ICD-  
28 8.[17, 22] Details of this procedure and the validity of the assessments have been described  
29 earlier.[17, 23-24]

30 Intellectual ability (IQ) was based on four main intellectual and cognitive tests, measuring verbal,  
31 logical-inductive, spatial, and technical and mechanical ability. The results of the tests were  
32 aggregated in a 5-point summary score for overall intelligence, as described in detail by  
33  
34  
35  
36  
37  
38  
39  
40  
41  
42  
43  
44  
45  
46  
47  
48  
49  
50  
51  
52  
53  
54

1  
2  
3  
4  
5  
6  
7 Ståhlberg[25] and David et al.[26] These scale of intelligence capacity was scored 1=very bad;  
8 2=bad; 3=moderate; 4=good; 5=very good and expressed as intelligence (1–3 vs. 4–5). Details of  
9 this procedure and the validity of the assessments have been described by Otto.[22]  
10  
11 Problematic alcohol use was dichotomized (yes vs. no, with yes defined as one or more of  
12 consumption of  $\geq 210$  g pure alcohol per week, having ever taken an ‘eye-opener’, being  
13 intoxicated often, having been taking into custody for public drunkenness on at least one  
14 occasion, and non-prescription drug (ever vs. never). Drug misuse was coded (yes vs. no), with  
15 yes defined as used illicit drugs 10 times or more or any intravenous drug use.  
16  
17  
18  
19  
20  
21

### 22 **Measures of alcohol and drug misuse and suicide attempt**

23  
24 Data from the National Swedish inpatient register were used to identify inpatient care with alcohol  
25 and drug misuse according to ICD-8 and ICD-9 from 1987 and ICD-10 from 1997 onwards.  
26  
27 The register includes details concerning inpatient care stays and days at hospital and diagnoses,  
28 and has covered all public hospitals in Stockholm and Uppsala County since 1972, 85% of all  
29 Swedish public inpatient care stays since 1983, and about 98–99% since 1987. The ICD  
30 classifications for hospitalization and mortality were: Drug misuse – ICD-8: 304 and 965.0; ICD-  
31 9: 304, 965A, 968F, 969G and 969H; and ICD-10: F11-12, F14, F15, F16, F18, F19, O35.5,  
32 P04.4, T40.0–T40.3, T40.5–T40.9, T43.6, Z71.5, and X42. Alcohol misuse – ICD-8: 291, 303,  
33 571.00, 571.01 and 980; ICD-9: 291, 303, 305A, 357F, 425F, 535D, 571A–571D and 980; and  
34 ICD-10: E24.4, F10, G31.2, G62.1, G72.1, I42.6, K29.2, K70, K86.0, O35.4, P04.3, Q86.0, T51,  
35 X45, Y91, Z50.2 and Z71.4. Suicide attempt: ICD-8 and ICD- 9: Determined suicide attempt:  
36 E950-E959 and undetermined E980-E989; ICD-10: Determined X60-X84 and undetermined  
37 suicide attempt: Y10-Y34.  
38  
39  
40  
41  
42  
43  
44  
45  
46  
47

### 48 **Suicide**

49  
50 Cause of Death Register provides mortality data and covers more than 99% of all deaths  
51 occurring in Sweden and is based on information from death certificates. Suicide was classified  
52  
53  
54  
55  
56  
57  
58  
59  
60

1  
2  
3  
4  
5  
6  
7 according to ICD-8 and ICD-9: E950-E959 and ICD-10: X60-X84 or as death with undetermined  
8  
9 intent ICD-8 and ICD-9: E980-E989 and ICD-10: Y10-Y34. The same ICD-codes as for the  
10  
11 hospital register.

### 12 **Measurement of crime**

14 Data from the National Crime Register were used to identify date, type, and number of criminal  
15  
16 offenses. The Crime Register contains information on all convictions in Sweden from 1966 and  
17  
18 onwards. Criminality was divided in three categories: no crime, violent crime and non-violent  
19  
20 crime. Violence was defined as: homicide, manslaughter and assault and non-violent crime all the  
21  
22 other convictions. We also categorized the cohort according to number of crimes meaning for  
23  
24 violent and non-violent offenders: (0, 1, and 2 or more crimes).

26 The data was linked at Statistics Sweden (Statistiska Centralbyrån) via the unique personal  
27  
28 number for each individual, which thereafter was replaced with an individual serial number  
29  
30 making the data anonymous to the research group, after approval of Karolinska Institute.

Formatted: Highlight

### 31 **Statistical analyses**

Formatted: Highlight

33 Cox proportional bivariate and multivariate regression analysis was used to calculate hazard ratios  
34  
35 (HRs) with 95% confidence intervals (95% CI) for violent and non-violent criminality and  
36  
37 suicide. We adjusted for early confounders measured at conscription in relation to time to  
38  
39 suicide. The survival time was calculated from September 1969 until time of death for those who  
40  
41 died during 1969 (2 subjects) and from 1 January 1970 until death or until 31 December 2004 for  
42  
43 all other subjects in the cohort.

44 We had no exact information whether a person had emigrated from Sweden or not during the  
45  
46 follow-up period, therefore we could not censor for emigration in the calculation of person time.

48 In order to investigate the association between the number of criminal offences and mortality, we  
49  
50 categorized subjects according to committed numbers of offences (0, 1, 2 and more) in relation to  
51  
52 the time to suicide by using Cox proportional regression analysis. We adjusted for potential risk  
53  
54

factors as described above. These were measured at the time of conscription and only measured once why the time order was difficult to prove. Some of these variables like alcohol- or substance use could act as confounders or mediators on both criminality and suicide.

A test of the proportional hazard assumption was performed for each confounder in bivariate and multivariate analyses by using a time-dependent explanatory variable. If the p-value was significant ( $p < .05$ ) the proportional hazard assumption was violated and the variable was not included in the analyses.

We used Kaplan-Meier survival curves to plot survival probability of suicide in non-criminals, violence and other criminality during the 35 years follow-up.

Chi-square ( $X^2$ ) test was used when calculating early confounders and hospitalization in relation to criminality.

## RESULTS

Of the total cohort, 2,671 (5.5%) died during the follow-up period. Of these 615 (23.6%) died due to suicide (474 determined and 141 undetermined). Suicide was prevalent in the criminal groups: no criminality (4.11%), non-violent (7.25%) and violent criminality (13.67%).

The suicide cases were rather equally distributed throughout the 35 years follow-up period.

More than one third (34%) of the suicide cases were 30 years or younger, 30% were in the age category 31-40 years and the remaining subjects (36%) were 41 years or older. The mean age was 36 years.

Table 1 shows the distribution of 11 confounders measured at conscription divided into the three groups of criminals. All risk factors differed significantly ( $p < 0.0001$ ) between the groups, but mostly contact with the police or juvenile authorities, and having had conducted problems at school.

Regarding hospitalization of alcohol or drug misuse which had occurred during the follow-up period, alcohol misuse differed most significantly between the groups.

Formatted: Highlight

Formatted: Highlight

### Methods of suicide

Poisoning was the most prevalent method of suicide (n=278) followed by hanging and suffocation (n=149) (Table 2). The violent offenders had nearly seven times higher hazard to die from poisoning (HR=6.92, 95%CI 4.91-9.76), while the non-criminal group had twice lower risk (HR=2.94, 95%CI 2.26-3.81). The violent group had three times higher hazard ratio to die due to shooting by firearm, while the non-violent group had no significant risk.

### Crude and multivariate analyses

Violent related criminality was mostly associated with suicide (HR=4.69, 95%CI 3.56-6.19) followed by non-violent criminality (HR=2.08, 95%CI 1.72-2.52) in bivariate analyses, while after adjustment for multiple confounders, the hazard ratios decreased to nearly three and two fold respectively (Table 3). In the fully adjusted model we also included alcohol and drug inpatient care stays and suicide attempt and found elevated hazard ratios, however, only significant in non-violent offenders.

### Repeated violent and non-violent offenders in relation to suicide

Both repeated non-violent and violent offences were associated with elevated hazard ratios of suicide in crude analyses (HR=3.27 and HR=5.40). When adjusted for early confounders the repeaters of both violent and non-violent offenders decreased to HRs=2.42 and 2.34, respectively (Table 4).

We conducted Kaplan-Meier survival distribution curves for the three criminal groups in relation to suicide from 1970 up to 2004. We found that violent criminality was associated with lower survival (Fig 1).

## DISCUSSION

This study aimed to analyse suicide in three groups concerning criminal offences: non-criminal, violent and non-violent criminal offenders.

Formatted: Highlight

1  
2  
3  
4  
5  
6  
7 We found that nearly one third of the death cases were due to suicide in those who had ever  
8 committed a violent offence and one fourth in the non-violent group, which is in line with earlier  
9 studies reporting high proportionate mortality (the percentage of the dead who died by suicide)  
10 among homicide offenders and among personality-disordered offenders subject to forensic  
11 psychiatric assessment.[27-29]

12  
13  
14  
15  
16 The main finding was that violent offenders had nearly five times higher crude risk and non-  
17 violent offenders more than two-fold higher risk for suicide compared to no criminals. Even after  
18 controlling for multiple confounders measured at conscription the hazard ratios remained  
19 significant. Alcohol and substance misuse and attempted suicide in the fully adjusted model were  
20 confounding on suicide remaining barely significant or non-significant risk for suicide. This imply  
21 a strong association between these clinical predictors and suicide risk.[11,30] However, we do not  
22 have knowledge about the time order between criminality and the clinical factors measured during  
23 the follow-up period, why we have to take the results with cautions.

24  
25  
26  
27  
28 We found that poisoning as method of completed suicide was most prevalent in violent and non-  
29 violent criminals, while hanging was the most prevalent method among non-criminals. That was

30  
31  
32 also the case for men in the whole of Sweden.[31] In a Danish national register study of 9708

33  
34  
35  
36  
37  
38  
39  
40  
41  
42  
43  
44  
45  
46  
47  
48  
49  
50  
51  
52  
53  
54  
55  
56  
57  
58  
59  
60  
suicide cases and 188,134 age and gender matched living controls, hanging was the leading  
suicide method among men, while poisoning among women.[32-33] One possible explanation to

the high prevalence of poisoning in criminals in our study could be that alcohol and substance use  
was more prevalent in the criminal groups including fatal and non-fatal poisonings compared to  
non-criminals.

There is some evidence in the literature that violent criminals have higher rates of suicide, but  
these numbers are often derived from prison populations with often difficult circumstances such as  
overcrowded cells and spaces which may contribute to psychiatric illness.[34] Very few earlier

Formatted: Highlight

Formatted: Highlight



1  
2  
3  
4  
5  
6  
7 studies on the association between violent and non-violent criminality and suicide have been  
8  
9 conducted in a cohort representing the general population and with a long follow-up period.  
10

11 However, national data from England and Wales found after age standardization, 9- to 13-fold  
12 increased risk for suicide in both prisoners and non-custody offenders.[34]  
13

14 The yearly incidence rates of suicide have not shown a clear decrease in the younger age  
15 categories in Sweden, why it is important to identify delinquency at young ages and other risk  
16 factors in order to find preventive strategies for this group.[5] Generally, suicide rates are higher  
17 among the older age groups, often due to loneliness, anxiety disorder and depression.[35-36] In  
18 this study, the suicide cases were rather equally distributed throughout the 35 years follow-up  
19 period which probably means that all age categories seem to be vulnerable for suicide.  
20

21 It has been argued that suicide attempts by poisoning nowadays have mostly non-fatal outcome  
22 because of lower dosages after the introduction of blister packaging and often being rescued by  
23 accessible emergency care [37-38], indicating the importance of analysing both licit and illicit  
24 drugs involving in suicide. As mentioned above the criminal groups are more likely to use illicit  
25 drugs and additionally alcohol and prescribed drugs.[11, 35]  
26

27 Suicide attempts had been experienced by 1192 men (2.4%), which could be considered as rather  
28 low frequency when comparing with the completed suicides (n=615). An American national  
29 study (National Survey on Drug Use and Health), based on interviews and web-questionnaires  
30 from 92,264 respondents in year 2008 and 2009, found one suicide case for every 25 attempted  
31 suicides.[39] We had data on only suicide attempts needing inpatient care, namely serious suicide  
32 attempts, which could explain the ratio. We did not have data on attempted suicides that not turn  
33 up as hospital records. Some suicide attempters do not search help at any care givers.[40-41]. In  
34 our study, one out of five suicide victims had attempted suicide, confirming a strong association  
35 between attempted and completed suicide. This was especially evident for violent offenders where  
36 one in three had experienced attempted suicide. Suicide attempt has been considered as one of the  
37  
38  
39  
40  
41  
42  
43  
44  
45  
46  
47  
48  
49  
50  
51  
52  
53  
54

1  
2  
3  
4  
5  
6  
7 strongest predictors of suicide and the risk seem to be elevated up to older ages and during long  
8 time periods.[42] Alcohol misuse has also in other studies been pointed out as a severe risk factor  
9 for suicide and in some studies the second most common diagnostic group.[35,43]. Wilcox et  
10 al.[16] found alcohol misusers having a 10-fold increase risk for suicide in a mixed-age cohort.  
11 Likewise, in a longitudinal cohort study by Flensburg-Madsen et al.,[44] individuals with alcohol  
12 use disorders had eight times higher hazard ratios of suicide compared to individuals with no  
13 alcohol use. The hazard ratio fell to three after adjustment of psychiatric disorders. These findings  
14 indicate the importance of early detection and prevention strategies and treatment for substance  
15 users and especially those with suicidal tendencies in all ages.[36] In the present study, about half  
16 of the violent offenders had reported either risky alcohol or substance use at the time of  
17 conscription and nearly one third had been treated at hospital for an alcohol related diagnosis. The  
18 relationship between alcohol use and violence seems to be complex.[45] The fact that the suicide  
19 rate is somewhat higher in the violent criminals than non-violent criminals, one could assume that  
20 alcohol misuse play an important role for both violence and suicide [43].

21 We found that one third of the violent offenders were already diagnosed at conscription with a  
22 psychiatric diagnosis. Psychiatric disorders are strongly related to suicide risk, whereas the  
23 association between mental illness and violent crime is not as evident. King and Barraclough[45]  
24 found 27 times higher risk of unnatural death (suicide, accident and undetermined) among  
25 individuals who had recently been in contact with psychiatric clinics compare to those who had  
26 not. Persons with severe psychiatric disorders like affective disorder and schizophrenia have  
27 highly elevated lifetime suicide risk.[46-47]

#### 28 **Advantages and limitations**

29 An advantage of this study is the large national cohort with a longitudinal design and with several  
30 adolescent covariates. Only a small part 2-3 % of the conscripts was excluded from the study  
31 mainly because of physical or psychiatric disorders. The two questionnaires used at conscription  
32

1  
2  
3  
4  
5  
6  
7 were non-anonymous, which could have contributed to a lower response rate of especially  
8 problematic issues such as alcohol and substance use. However, other studies on conscription  
9 cohort have compared register and self-reported information of alcohol and substance use and  
10 found good agreement between the different sources of data [23]. A small number of the  
11 conscripts missed one or some of the items in the questionnaires. That was especially evident for  
12 those subjects who had committed violent offences whereas the response rate for the confounders  
13 included in the study varied from 0.26 to 9.45%. The corresponding measures for other criminality  
14 and non-criminals were: 0.20 to 6.37% and 0.13 to 4.19%. The violent offenders had probably  
15 more severe risk factors than the non-violent and non-criminal groups which could have resulting  
16 in underestimating of the hazard ratios of suicide. One could assume that these subjects also had  
17 higher rates of substance use and other maladjusted behaviour measured at conscription which in  
18 turn could have affected the outcome.[48] However, we have no reason to believe that the risk for  
19 the outcome, suicide, has been considerable affected due the internal missing data.

20  
21  
22  
23  
24  
25  
26  
27  
28  
29  
30  
31 Another limitation of this study is that we do not have information about criminality not turning  
32 up in the register. Some subjects could have committed many violent and non-violent crimes,  
33 especially in combination with substance misuse, and never been convicted of a crime.

### 34 35 36 37 **Conclusions**

38  
39 We found that individuals registered for either violent or other criminality are at increased risk for  
40 committing suicide in crude analysis and that is especially evident for those who were criminal  
41 repeaters. However, after adjusting for confounders measured at conscription the risk was still  
42 elevated and just slightly significant or non-significant in the fully adjusted model including  
43 hospitalization due to alcohol and substance misuse and suicide attempt. The two criminal groups  
44 were more likely to commit suicide by poisoning indicating prior experiences of substance misuse.  
45  
46  
47  
48  
49  
50 Hanging was most prevalent in the non-criminal group which is in line with the general population  
51 in Sweden [31]. We suggest that authorities and the health care should observe the increased risk  
52  
53  
54

1  
2  
3  
4  
5  
6  
7 for suicide in both violent and non-violent criminals, especially those with earlier suicide attempt  
8 and comorbid alcohol and substance misuse.

9  
10  
11 **Acknowledgements** We want to thank statistician Anders Leifman for the valuable statistical  
12 advice.

13  
14  
15 **Competing interests:** none.

Formatted: Highlight

16  
17 **Funding:** The research for this study was supported by Co-ordination of the Swedish Drug Policy  
18 (Dnr 238/2006:18), by the Swedish Research Council (Project numbers: K2009-61P-21304-04-4;  
19 K2009-61X-21305-01-1) and through the regional agreement on medical training and clinical  
20 research (ALF) between Stockholm County Council and Karolinska Institutet, Stockholm Centre  
21 for Psychiatric Research and Education.

22  
23  
24 **Contributors:** MS planned the study, conducted the statistical analyses and wrote the final  
25 version of the manuscript. AS contributed to the planning and data analyses. JJ and AR  
26 contributed to the planning of the study and preparing of the manuscript. All authors contributed  
27 to the final draft of the manuscript.

28  
29  
30  
31  
32  
33 **Ethics approval:** Karolinska Institute Research Ethics Committee (Dnr 2007/174-31, Dnr  
34 2008/1086-31/5).

## Reference

1. World Health Organization, World suicide prevention day 2012. <http://www.who.int/mediacentre/events/annual/world-suicide-prevention-day/en/>
1. Bertolote JM, Fleischmann A. A global perspective on the magnitude of suicide mortality. In: D Wasserman and C Wasserman (eds.). *Oxford Textbook of Suicidology and Suicide Prevention: a global perspective*. Oxford: Oxford University Press.2009;91-98.
2. Patton GC, Coffey C, Sawyer SM et al. Global patterns of mortality in young people: a systematic analysis of population health data. *Lancet* 2009;**374**: 881-892.
3. Karimina A, Law MG, Butler TG et al. Suicide risk among recently released prisoners in New South Wales, Australia. *Med J Aust* 2007;**18**:387-390.
4. Fazel S, Benning R, Danesh J. Suicides in male prisoners in England and Wales, 1978-2003. *Lancet* 2005;**366**:1301-2.
5. Webb R, Qin P, Stevens H. National study of suicide in all people with a criminal justice history. *Arch Gen Psychiatr* 2011;**68**,591-9.
6. Hayes LM. National study of jail suicides: seven year later. *Psychiatr Q* 1989;**60**:7-29.
7. Boardman AP, Grimbaldeston AH, Handley C. et. al. The North Staffordshire Suicide Study: a case-control study of suicide in one health district. *Psychol Med* 1999;**29**:27- 33.
8. Linsley KR, Johnson N, Martin J. Police contact within 3 months of suicide and associated health service contact. *Br J Psychiatry* 2007;**190**:170-1.
9. Björkenstam E, Björkenstam C, Vinnerljung B et al. Juvenile delinquency, social background-a Swedish national cohort study of 992881 young adults. *Int J Epidemiol* 2011;**40**:1585-92.
10. Harris EC, Barraclough B. Suicide as an outcome for mental disorders. A meta-analysis. *Br J Psychiatry* 1997;**170**:205-28.

- 1  
2  
3  
4  
5  
6  
7 11. Tidemalm D, Långström N, Lichtenstein P. et al., Risk of suicide after suicide attempt  
8 according to coexisting psychiatric disorder: Swedish cohort study with long term follow-up. BMJ  
9 2008;**337**:a2205doi:10.1136/bmj.a2205.  
10  
11 12. Runeson B, Tidemalm D, Dahlin M et al. Method of attempted suicide as predictor of  
12 subsequent successful suicide: national long term cohort study. BMJ 2010;  
13 **340**:c3222doi:10.1136/bmj.c3222.  
14  
15 13. Stenbacka M, Moberg T, Romelsjö A et al. Mortality and causes of death among violent  
16 offenders and victims - a Swedish population based longitudinal study. BMC public health  
17 2012;**12**:1-10.  
18  
19 14. Darke S, Douflou J, Torok M. Toxicology and circumstances of completed  
20 suicide by means other than overdose. J Forensic Sci 2009;**54**:490-4.  
21  
22 15. Darke S, Duflo J, Totok M. Toxicology and characteristics of fatal oxycodone toxicity cases  
23 in New South Wales, Australia 1999-2008. J Forensic Sci 2011;**56**:690-3.  
24  
25 16. Wilcox HC, Conner KR, Caine ED. Association of alcohol and drug use disorders and  
26 completed suicide: an empirical review of cohort studies. Drug Alc Depend 2004;**7**:11-19.  
27  
28 17. Allebeck P, Allgulander C, Fisher LD. Predictors of completed suicide in a cohort of 50465  
29 young men: role of personality and deviant behaviour. BMJ 1988;**297**:176-178.  
30  
31 18. Andreasson S, Allebeck P, Romelsjö A. Alcohol and mortality among young men.  
32 Longitudinal study of Swedish conscripts. Br Med J 1988;**296**:1021-5.  
33  
34 19. Eriksson A, Romelsjö A, Stenbacka M. et al. Early risk factors for criminal offending in  
35 schizophrenia: a 35-year longitudinal cohort study. Soc Psychiatr Epidemiol. 2011 **46**:925-32.  
36  
37 20. Stenbacka M, Leifman L, Dalal K,et al.. Early Predictors of Injury Mortality among Swedish  
38 Conscripts:A 35-Year Follow-up Study. Accid Anal Prev 2011;**43**:228-34.  
39  
40 21. Davstad I, Allebeck P, Leifman A et al. Self-reported drug use and mortality among a  
41 nationwide sample of Swedish conscripts – A 35-year follow-up. Drug Alc Depend 2011;  
42  
43  
44  
45  
46  
47  
48  
49  
50  
51  
52  
53  
54  
55  
56  
57  
58  
59  
60

Formatted: Highlight

1  
2  
3  
4  
5  
6  
7 **118**:383-90.

8  
9 22. Otto U: Male youths. A sociopsychiatric study of a total annual population of Swedish  
10 adolescent boys. *Acta Psychiatr Scand* 1976;Suppl **264**:1-312.

11  
12 23. Benson G, Holmberg MB: Validity of questionnaire in population studies on drug use. *Acta*  
13 *Psychiatr Scand* 1985;**70**:9-18.

14  
15 24. Rydelius P-A. Alcohol-abusing teenage boys. *Acta Psychiatr Scand* 1983;**68**:368-80.

16  
17 25. Ståhlberg B. I-provet (intelligence test: the Swedish enlistment battery). Karlstad.  
18  
19  
20 Militärpsykologiska Institutet. 1971. (In Swedish)

21  
22 26. David AS, Malmberg L, Brandt L et al. 1997. IQ and risk for schizophrenia: a population-  
23 based cohort study. *Psychol Med* 1997;**27**:1311–23.

24  
25 27. Kullgren G, Tengström A, Grann M. Suicide among personality-disordered offenders: a  
26  
27 follow-up study of 1943 male criminal offenders. *Psychiatr Epidemiol* 1998;**33**:102-6.

28  
29 28. Jokinen J, Forslund K, Nordström AL et al. Suicide risk after homicide in Sweden. *Arch*  
30 *Suicide Res* 2009; **13**:297-301.

31  
32 29. Jokinen J, Forslund K, Ahnemark E et al. Karolinska Interpersonal Violence Scale predicts  
33  
34 suicide in suicide attempters. *J Clin Psychiatry* 2010; **71**:1025-1032.

35  
36 30. Waern M. Risk factors for suicide in the elderly: What do we know? What do we need to find  
37  
38 out? *Suicidologi* 2011;**16**:2:3-8.

39  
40 31. National Board on Health and Welfare, The Cause of Death Register, 2012.

41  
42 32. Webb RT, Qin P, Stevens H, Shaw J, Appleby L, Mortensen PB. National study of suicide  
43  
44 method in violent criminal offenders. *J Affect Disord* 2013; [[http://dx.doi.org/](http://dx.doi.org/10.1016/j.jad.2013.04.001)  
45  
46  
47 [10.1016/j.jad.2013.04.001](http://dx.doi.org/10.1016/j.jad.2013.04.001)].

48  
49 33. Titelman D, Oskarsson H, Wahlbeck K et al. Suicide mortality trends in the Nordic countries  
50  
51 1980–2009. *Nord J Psychiatry* 2013;1–10.23293897.

- 1  
2  
3  
4  
5  
6  
7 34. Sattar G. Rates and causes of death among prisoners and offenders under community  
8 supervision. Home Office Research Study. London Home Office. 2001;231.
- 9  
10 35. Waern M. Alcohol dependence and abuse in elderly suicides. Alcohol and Alcoholism  
11 2003;38:249-254.
- 12  
13 36. Whiteford HA, Degenhardt L, Rehm J et al. Global burden of disease attributable to mental  
14 and substance use disorders: findings from the Global Burden of Disease Study 2010.  
15 Lancet 2013;28. doi:pii: S0140-6736(13)61611-6. 10.1016/S0140-6736(13)61611-6  
16  
17  
18  
19 37. Hawton K, Simkin S, Deeks J et al. UK legislation on analgesic packs: Before and after study  
20 of long term effect on poisonings. BMJ 2004; **329**:1076.
- 21  
22  
23 38. Hawton K, Bergen H, Simkin S et al. Long term effect of reduced pack sizes of paracetamol  
24 on poisoning deaths and liver transplant activity in England and Wales: interrupted time series  
25 analyses. BMJ 2013: 346, f403. doi:10.1136/bmj.f403.
- 26  
27  
28  
29 39. Crosby AE, Han B, Ortega LAG et al. Suicidal thoughts and behaviors among adults aged  $\geq 18$   
30 years-United States, 2008-2009. MMWR Surveillance Summaries 2011;60(no. SS-13).
- 31  
32  
33 40. Guilherme B, Jules A, Nock MK et al. Risk factors for twelve-month suicide attempts in the  
34 National Comorbidity Survey Replication (NCS-R). Psychol Med 2006;**36**:1747-57.
- 35  
36  
37 41. De Leo D, Ester C, Kym S et al. Lifetime risk of suicide ideation and attempts in an Australian  
38 community: Prevalence, suicidal process, and help-seeking behaviour. 2005;**86**:215-24.
- 39  
40  
41 42. Suominen K, Isometsa E, Suokas J et al. Completed suicide after a suicide attempt: a 37-year  
42 follow-up study. Am J Psychiatry 2004;**161**:562-563.
- 43  
44  
45 43. Flensburg-Madsen T, Knop J, Mortensen EL et al. Alcohol use disorders increase the risk of  
46 completed suicide—Irrespective of other psychiatric disorders. A longitudinal cohort study.  
47 Psychiatry Research 2009;**167**:123-130.
- 48  
49  
50 44. Lipsey MW, Wilson DB, Cohen MA, Derzon JH: Is there a causal relationship between  
51 alcohol use and violence? A synthesis of evidence. Recent Dev Alcohol 1997;**13**:245-82.
- 52  
53  
54  
55  
56  
57  
58  
59  
60



- 1  
2  
3  
4  
5  
6  
7 45. King E, Barraclough B. Violent death and mental illness: A study of a single catchment area  
8 over eight years. *Br J Psychiatry* 1990;**156**:714-20.  
9  
10 46. Carlborg A, Winnerbäck K, Jönson EG. et al. Suicide in schizophrenia. *Expert Review of*  
11 *Neurotherapeutics* 2010;**10**,1153–1164.  
12  
13 47. Nordentoft M, Mortensen PB, Pedersen CB. Absolute risk of suicide after first hospital contact  
14 in mental disorder. *Arch Gen Psychiatry*. 2011;**68**(10):1058-64.  
15  
16 48. Stattin H, Romelsjö R, Stenbacka M. Personal resources as modifiers of the risk for future  
17 criminality: an analysis of protective factors in relation to 18-year-old boys. *Br J Criminol*  
18 1997;**37**:198–223.  
19  
20  
21  
22  
23  
24  
25  
26  
27  
28  
29  
30  
31  
32  
33  
34  
35  
36  
37  
38  
39  
40  
41  
42  
43  
44  
45  
46  
47  
48  
49  
50  
51  
52  
53  
54  
55  
56  
57  
58  
59  
60

1  
2  
3  
4  
5  
6  
7  
8  
9  
10  
11  
12  
13  
14  
15  
16  
17  
18  
19  
20  
21  
22  
23  
24  
25  
26  
27  
28  
29  
30  
31  
32  
33  
34  
35  
36  
37  
38  
39  
40  
41  
42  
43  
44  
45  
46  
47  
48  
49  
50  
51  
52  
53  
54  
55  
56  
57  
58  
59  
60

| Table 1. Risk factors and hospitalization in relation to non-violent and violent criminality |          |                         |                     |                   |
|----------------------------------------------------------------------------------------------|----------|-------------------------|---------------------|-------------------|
|                                                                                              | No crime | Non-violent criminality | Violent criminality | Chisq, prob.**)   |
| Fathers' social class                                                                        |          |                         |                     |                   |
| III                                                                                          | 47.67    | 50.38                   | 58.07               |                   |
| 1-II                                                                                         | 48.43    | 43.24                   | 32.48               | 204.72, p<0.0001  |
| Missing *)                                                                                   | 3.90     | 6.37                    | 9.45                |                   |
| Medication for nervous problems in the family                                                |          |                         |                     |                   |
| Yes (parents or other family members)                                                        | 30.11    | 34.53                   | 40.35               |                   |
| No                                                                                           | 67.02    | 61.61                   | 54.11               | 201.34, p<0.0001  |
| Missing                                                                                      | 2.88     | 3.86                    | 5.54                |                   |
| Conduct problems at school                                                                   |          |                         |                     |                   |
| Yes (at least once)                                                                          | 17.69    | 33.44                   | 52.22               |                   |
| No                                                                                           | 81.39    | 65.05                   | 45.45               | 2470.41, p<0.0001 |
| Missing                                                                                      | 0.92     | 1.51                    | 2.33                |                   |
| Own medication for psychiatric problems                                                      |          |                         |                     |                   |
| Yes                                                                                          | 9.94     | 1858                    | 456                 |                   |
| No                                                                                           | 89.02    | 85.22                   | 77.23               | 293,35, p<0.0001  |
| Missing                                                                                      | 1.04     | 1.68                    | 2.73                |                   |

|                                              |       |       |       |                   |
|----------------------------------------------|-------|-------|-------|-------------------|
| Emotional control                            |       |       |       |                   |
| Very bad, bad                                | 26.8  | 34.84 | 49.89 |                   |
| Very good, good, medium                      | 72.6  | 64.12 | 48.22 | 769.81, p<0.0001  |
| Missing                                      | 0.70  | 1.04  | 1.89  |                   |
| IQ                                           |       |       |       |                   |
| Below average                                | 16.03 | 23.24 | 35.69 |                   |
| Above average, average                       | 83.84 | 76.56 | 64.04 | 764.81, p<0.0001  |
| Missing                                      | 0.13  | 0.20  | 0.26  |                   |
| Psychiatric diagnosis (at conscription)      |       |       |       |                   |
| Yes (at least one diagnosis)                 | 9.73  | 15.87 | 29.85 |                   |
| No                                           | 88.58 | 82.06 | 68.53 | 1008.59, p<0.0001 |
| Missing                                      | 1.69  | 2.07  | 1.63  |                   |
| Contact with police and juvenile authorities |       |       |       |                   |
| Yes (several or some times)                  | 20.77 | 39.38 | 64.09 |                   |
| No                                           | 77.86 | 58.62 | 33.14 | 3305.72, p<0.0001 |
| Missing                                      | 1.37  | 2.00  | 2.77  |                   |
| Risky alcohol use                            |       |       |       |                   |
| Yes                                          | 8.29  | 19.79 | 39.60 |                   |
| No                                           | 90.43 | 78.40 | 57.58 | 2681.86, p<0.0001 |
| Missing                                      | 1.28  | 1.81  | 2.91  |                   |
| Dug misuse                                   |       |       |       |                   |
| Yes                                          | 1.81  | 6.49  | 10.94 |                   |

|                                         |       |       |       |                    |
|-----------------------------------------|-------|-------|-------|--------------------|
| No                                      | 94.00 | 88.53 | 82.22 | 1022, 23, p<0.0001 |
| Missing                                 | 4.19  | 4.97  | 6.84  |                    |
| Sniffing                                |       |       |       |                    |
| At least once                           | 9.84  | 18.43 | 29.58 |                    |
| No                                      | 88.82 | 79.38 | 66.81 | 1234.54, p<0.0001  |
| Missing                                 | 1.34  | 2.19  | 3.60  |                    |
| <b>Hospitalization</b>                  |       |       |       |                    |
| Alcohol hospitalization                 |       |       |       |                    |
| Yes (at least once)                     | 1.76  | 10.75 | 31.96 |                    |
| No                                      | 98.24 | 89.25 | 68.04 | 4464.28, p<.00001  |
| Drug use hospitalization                |       |       |       |                    |
| Yes (at least once)                     | 0.15  | 2.48  | 11.65 |                    |
| No                                      | 99.85 | 97.52 | 88.35 | 2269.25, p<.00001  |
| Hospitalization for<br>suicide attempts |       |       |       |                    |
| Yes (at least once)                     | 0.94  | 4.10  | 13.54 |                    |
| No                                      | 99.06 | 95.90 | 86.46 | 1647.76, p<0.0001  |

\*) No answers were given to this item

\*\*) p-value calculated for non-missing observations

1  
2  
3  
4  
5  
6  
7  
8  
9  
10  
11  
12  
13  
14  
15  
16  
17  
18  
19  
20  
21  
22  
23  
24  
25  
26  
27  
28  
29  
30  
31  
32  
33  
34  
35  
36  
37  
38  
39  
40  
41  
42  
43  
44  
45  
46  
47  
48  
49  
50  
51  
52  
53  
54  
55  
56  
57  
58  
59  
60

| Suicide methods related to violent and non-violent criminality. Cox proportional regression analyses. |                   |                   |
|-------------------------------------------------------------------------------------------------------|-------------------|-------------------|
| Methods of suicide                                                                                    | Crime             | HR , 95% CI       |
| Poisoning (n=278):<br>E950-E952, E980-E982, X60-X69, Y10-Y19                                          | No crime          | 1.0               |
|                                                                                                       | Non-violent crime | 2.94, 2.26-3.81   |
|                                                                                                       | Violent crime     | 6.92, 4.91-9.76   |
| Hanging/suffocation (n=149): E953, E983, X70, Y20                                                     | No crime          | 1.0               |
|                                                                                                       | Non-violent crime | 1.28, 0.90-1.83   |
|                                                                                                       | Violent crime     | 2.54, 1.47-4.40   |
| Firearm (n=69):<br>E955,E985, X722-X74, Y422-Y424                                                     | No crime          | 1.0               |
|                                                                                                       | Non-violent crime | 1.39, 0.83-2.34   |
|                                                                                                       | Violent crime     | 3.08, 1.44-6.60   |
| Drowning (n=41):<br>E954, E984, X71,Y21                                                               | No crime          | 1.0               |
|                                                                                                       | Non-violent crime | 1.62, 0.82-3.20   |
|                                                                                                       | Violent crime     | 5.17, 2.19-12.24  |
| Jump from heights (n=27):<br>E957, E987, X80, Y30                                                     | No crime          | 1.0               |
|                                                                                                       | Non-violent crime | 3.23,1.43-7.26    |
|                                                                                                       | Violent crime     | 4.41, 1.21-16.00  |
| Moving train (n=22):<br>E9580, E9880, X81, Y31                                                        | No crime          | 1.0               |
|                                                                                                       | Non-violent crime | 2.07, 0.84- 5.10  |
|                                                                                                       | Violent crime     | 4.40, 1.21- 15.98 |
| Cutting (n=16):<br>E956, E986,X79,Y28                                                                 | No crime          | 1.0               |
|                                                                                                       | Non-violent crime | 4.61, 1.58-13.50  |
|                                                                                                       | Violent crime     | 2.95, 0.35-25.23  |
| Others (n=13):<br>E958-959,E988-989, X75-X77, X79, X82-X84, Y425-Y27, Y29, Y32-Y34                    | No crime          | 1.0               |
|                                                                                                       | Non-violent crime | 2.32, 0.67-8.01   |
|                                                                                                       | Violent crime     | 8.99, 2.15-37.63  |

Formatted: Highlight

1  
2  
3  
4  
5  
6  
7  
8  
9  
10  
11  
12  
13  
14  
15  
16  
17  
18  
19  
20  
21  
22  
23  
24  
25  
26  
27  
28  
29  
30  
31  
32  
33  
34  
35  
36  
37  
38  
39  
40  
41  
42  
43  
44  
45  
46  
47  
48  
49  
50  
51  
52  
53  
54  
55  
56  
57  
58  
59  
60

Table 3. Criminality in relation to suicide adjusted for early risk factors measured at conscription <sup>1)</sup> and in addition adjusted for alcohol and drug inpatient and suicide attempt <sup>2)</sup>.

| Suicide     |                |              |                 |                           |                           |
|-------------|----------------|--------------|-----------------|---------------------------|---------------------------|
| N=615       |                |              |                 |                           |                           |
| Criminality | No. of exposed | No. of cases | HR Crude        | HR Adjusted <sup>1)</sup> | HR Adjusted <sup>2)</sup> |
| Never       | 32376          | 275          | 1.0             | 1.0                       | 1.0                       |
| Non-violent | 14183          | 252          | 2.08, 1.72-2.52 | 1.65, 1.35- 2.01          | 1.35, 1.10- 1.67          |
| Violent     | 2275           | 88           | 4.69, 3.56-6.19 | 2.68, 1.98-3.64           | 1.30, 0.92-1.82           |

<sup>1)</sup> adjusted for fathers' social class, medication for nervous problems in the family, conduct problems at school, own medication for psychiatric disorder, contact with police and juvenile authorities, emotional control, intellectual capacity, psychiatric diagnosis at conscription, sniffing of solvents, risky alcohol misuse and substance misuse.

<sup>2)</sup> In addition adjusted for alcohol and drug inpatient and suicide attempt.

Table 4. Number of offences adjusted for early risk factors at conscription <sup>1)</sup> and in addition for alcohol and drug inpatient and suicide attempt <sup>2)</sup>.

| Suicide<br>N=615                |                 |                           |                           |
|---------------------------------|-----------------|---------------------------|---------------------------|
| Criminality                     | HR Crude        | HR Adjusted <sup>1)</sup> | HR Adjusted <sup>2)</sup> |
| Non-violent offence             |                 |                           |                           |
| 0 offence (n=32376,<br>66.30%)  | 1.0             | 1.0                       | 1.0                       |
| 1 offence<br>(n=7322, 14.99%)   | 1.46, 1.15-1.85 | 1.25, 0.96-1.63           | 1.18, 0.91-1.55           |
| 2+ offences<br>(n=9136, 18.71%) | 3.27, 2.75-3.88 | 2.24, 1.81-2.77           | 1.49, 1.17-1.89           |
| Violent offence                 | HR Crude        | HR Adjusted <sup>1)</sup> | HR Adjusted <sup>2)</sup> |
| 0 offence (n=46559,<br>95.34%)  | 1.0             | 1.0                       | 1.0                       |
| 1 offence<br>(n=1556, 3.19%)    | 2.65, 1.96-3.58 | 1.83, 1.29-2.59           | 1.17, 0.82-1.67           |
| 2+ offence<br>(n=719, 1.47%)    | 5.40, 3.94-7.39 | 2.42, 1.61-2.59           | 0.84, 0.54-1.31           |

<sup>1)</sup> adjusted for fathers' social class, medication for nervous problems in the family, conduct problems at school, own medication for psychiatric disorder, contact with police and juvenile

1  
2  
3  
4  
5  
6  
7  
8  
9  
10  
11  
12  
13  
14  
15  
16  
17  
18  
19  
20  
21  
22  
23  
24  
25  
26  
27  
28  
29  
30  
31  
32  
33  
34  
35  
36  
37  
38  
39  
40  
41  
42  
43  
44  
45  
46  
47  
48  
49  
50  
51  
52  
53  
54  
55  
56  
57  
58  
59  
60

authorities, emotional control, intellectual capacity, psychiatric diagnosis at conscription, sniffing of solvents, risky alcohol misuse and substance misuse.

2) In addition adjusted for alcohol and drug inpatient and suicide attempt.

For peer review only

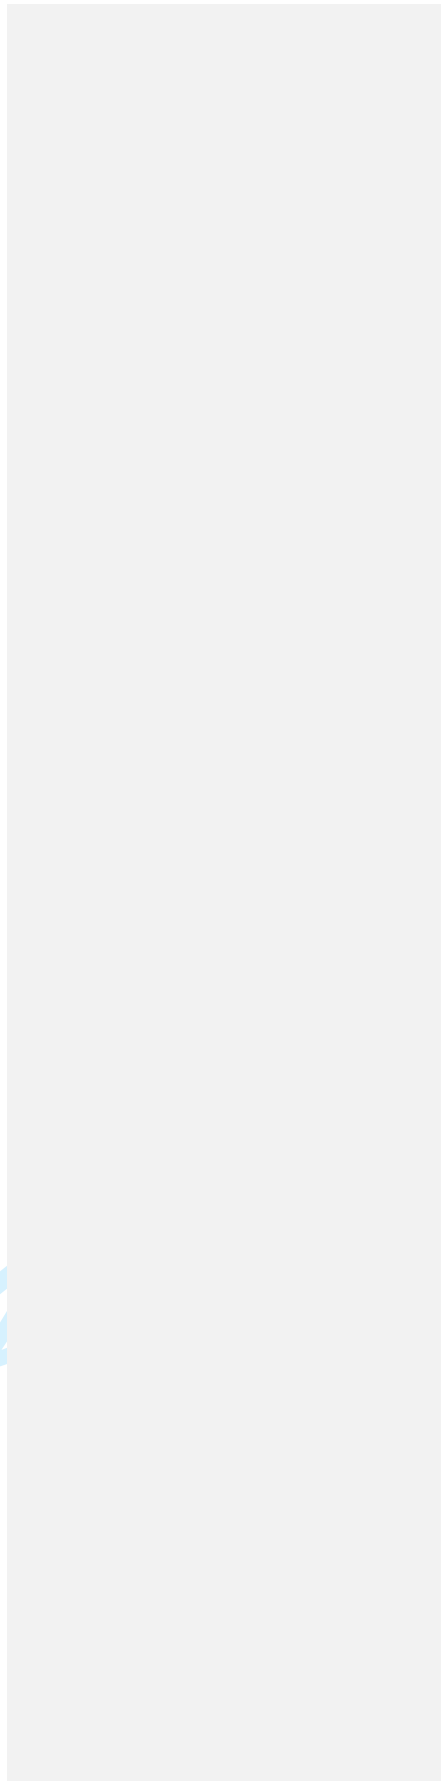





## Criminality and Suicide – A longitudinal Swedish Cohort Study

|                                 |                                                                                                                                                                                                                                                           |
|---------------------------------|-----------------------------------------------------------------------------------------------------------------------------------------------------------------------------------------------------------------------------------------------------------|
| Journal:                        | <i>BMJ Open</i>                                                                                                                                                                                                                                           |
| Manuscript ID:                  | bmjopen-2013-003497.R2                                                                                                                                                                                                                                    |
| Article Type:                   | Research                                                                                                                                                                                                                                                  |
| Date Submitted by the Author:   | 19-Nov-2013                                                                                                                                                                                                                                               |
| Complete List of Authors:       | Stenbacka, Marlene; Karolinska Institute, Public Health<br>Sidorchuk, Anna; Karolinska Institute, Public Health Sciences<br>Romelsjö, Anders; Karolinska Institute, Public Health Sciences<br>Jokinen, Jussi; Karolinska Institute, Clinical Neuroscience |
| <b>Primary Subject Heading</b>: | Epidemiology                                                                                                                                                                                                                                              |
| Secondary Subject Heading:      | Public health, Mental health, Epidemiology, Addiction                                                                                                                                                                                                     |
| Keywords:                       | EPIDEMIOLOGY, Substance misuse < PSYCHIATRY, Suicide & self-harm < PSYCHIATRY, PUBLIC HEALTH                                                                                                                                                              |
|                                 |                                                                                                                                                                                                                                                           |

SCHOLARONE™  
Manuscripts

Peer Review Only

## Criminality and Suicide—A longitudinal Swedish Cohort Study

Stenbacka M.,<sup>1,2</sup> Sidorchuk A.,<sup>2</sup> Romelsjö A.,<sup>2</sup> Jokinen J.,<sup>3</sup>

1). Addiction Center Stockholm, S:t Eriks Hospital Polhemsgatan 60, 112 82 Stockholm, Sweden.

2). Department of Public Health Sciences, Karolinska Institute, Widerströmska Building, 171 76 Stockholm, Sweden.

3). Department of Clinical Neuroscience, Karolinska Institute, Karolinska University Hospital Solna, 171 76 Stockholm, Sweden.

**Keywords: criminality, risk factors, substance use, violence, suicide**

**Word count: 3640**

## ABSTRACT

**Objectives:** This study aimed to investigate whether both violent and non-violent offending was related to elevated risk of suicide. We also investigated if the risk was higher among those with repeated offences and how experiences of substance abuse and suicide attempt modified the relationship.

**Design:** A nationwide prospective cohort study.

**Setting:** A register study of 49,398 conscripted men in 1969/70 in Sweden followed up during a 35-years period in official registers.

**Participants:** A Birth cohort of 49,398 men who were mandatory conscripted for military service in 1969/70 at age of 18-20 years. Possible confounders were retrieved from psychological assessments at conscription and the cohort was linked to mortality and hospitalization and crime records from 1970 and onwards. Estimates of suicide risks were calculated as hazard ratio (HR) with 95% confidence intervals (CI) using Cox proportional regression analyses with adjustment for potential confounding by family, psychological and behavioural factors including substance use and psychiatric disorders.

**Results:** Of the total cohort 2,671 (5.5%) persons died during the follow-up period. Of these 615 (23.6%) died due to suicide. Non-violent criminality was evident for 29.0% and violent criminality for 4.7% of all the participants. In the crude model, the violent offenders had nearly five times higher risk (HR=4.80, 3.73-6.19) to die from suicide and non-violent criminals about two (HR=2.14, 1.79-2.56). In the fully adjusted model the hazard ratios were still significant for suicide.

**Conclusions:** Experiences of violent or non-violent criminality were associated with increased risk of suicide. Co-morbidity with alcohol and substance use and psychiatric disorders modified the risk, but the suicide risk remained significantly elevated for non-violent criminals. It is crucial to identify offenders and especially repeated offenders who also suffer from alcohol or substance misuse and psychiatric illness in clinical settings in order to prevent suicide.

## ARTICLE SUMMARY

### Article focus

The aim of this cohort study was to analyse the association between violent and non-violent criminality and suicide in a large population based cohort of 49.398 18-20 years Swedish male conscripts followed-up for 35 years. Early confounders were collected through two questionnaires and interviews regarding psychosocial conditions including alcohol and substance use.

Criminality, suicide attempt and suicide data were collected through official registers.

### Key messages

- In Cox proportional regression analyses, the violent offenders had nearly five times higher hazard ratio to die from suicide and non-violent criminals about two. After controlling for early covariates, the hazard ratios still remained significant for suicide.
- Suicide attempt, severe alcohol and substance use measured at follow-up modified the risk of criminality on suicide.
- Poisoning as a suicide method was most prevalent in the criminal groups, while hanging in the non-criminals.

### Strengths and limitations of this study

- The study is based on a large national cohort with a longitudinal design and with several adolescent confounders. Only a small part 2-3 % of the participants was excluded from the study mainly because of physical or psychiatric disorder/disability.
- This study adds knowledge about the association between violent and non-violent criminality and the risk of suicide.
- The limitations were that non-anonymous questionnaires were used, which may have contributed to a lower response rate of especially problematic issues such as alcohol and substance use, but the response rate was nevertheless high.

## INTRODUCTION

Almost one million people worldwide die from suicide every year. Suicide was accounted for 1.8% of the total disease burden in 1998 and has been estimated to be 2.4% by 2020.[1] Further, suicide is one of the three leading causes of mortality in the age category 15-44 years and the second among those aged 15-19.[2]

Earlier studies on the relationship between criminality and suicide have been mostly conducted on populations in prison or newly released from prison.[3-6] Studies have found an elevated risk of 5 to 9 and in some studies much higher depending on the age group for suicide among prison inmates compared to the general population and more than a third of the male suicide cases had a history of criminality.[5-6]

Studies of suicide among offenders who are not in prisons are rather few, but an elevated risk in this population has also been reported.[7-8] Webb et al. examined suicide risk among people processed by Danish criminal justice system in a nested case-control study of 27,219 suicide cases and 524,899 matched living controls over 3 decades. More than one third of the male cases had a criminal history and when comparing with the general population custodial sentence, and psychiatric treatment and violent offences were important predictors for suicide.[5]

In a Swedish national cohort study of 992 881 young adults found that both female and male repeated offenders had a suicide risk of about six times higher than non-offenders. [9] Young female offenders had a risk of 3.7 and young male offenders had a risk of 3.0 after control for psychiatric in-patient care and for substance abuse until the end of the follow-up.[9]

A suicide attempt has been considered as the strongest predictor of the subsequent suicide. The suicide risk after an attempt was up to 40 times the expected rate[10] and lifetime prevalence suicide rates of suicide attempters with severe coexistent psychiatric disorder were even higher.

[11]

1  
2  
3 In a Swedish national register based study, it was found that patients who had attempted suicide by  
4 hanging evinced highest risk for suicide in one year after the attempt.[12]  
5

6  
7 Studies on risk factors for suicide have stressed the importance of substance misuse for elevated  
8 mortality rates.[13-14] In most studies suicide is far more prevalent in substance users than in the  
9 general population. For instance, Darke et al.[15] found that about one third of the substance  
10 misusers had experiences of suicide attempts. Suicide among opioid misusers has been estimated  
11 to be 14 times higher than the general population.[10,16] Further, one fifth or more of the suicide  
12 cases had substances presented in the blood in one study.[15]  
13

14  
15 A previous study on the Swedish conscripts with a 13-years follow-up revealed that social and  
16 behavioural factors and neurotic and personality disorder measured at conscription were most  
17 significantly associated with high rate of suicide.[17] Likewise, a longitudinal study of offenders  
18 and victims of violence and cause specific mortality showed that the hazard ratio for suicide risk  
19 was about two after adjustment for various psychosocial confounders.[13]  
20

21  
22 In this representative, nationwide, general population study we followed 49,398 Swedish  
23 conscripts during 35 years, in order to examine whether violent and non-violent offending were  
24 related to elevated risk of suicide. We also investigated if the risk was higher among those with  
25 repeated offences and how substance abuse and suicide attempt history modified the relationship.  
26  
27 Moreover, we studied the choice of suicide methods for the violent and non-violent criminal  
28 groups.  
29  
30

31  
32 This study aimed to address four main research questions:  
33

- 34  
35 (1) Do conscripts with violent or non-violent criminality offences differ in respect to risk of  
36 suicide?  
37  
38 (2) Does suicide risk increase with repeated offences?  
39  
40  
41  
42  
43  
44  
45  
46  
47  
48  
49  
50  
51  
52  
53  
54  
55  
56  
57  
58  
59  
60

1  
2  
3 (3) Does history of previous suicide attempt and/or serious substance and alcohol misuse modify  
4 the relationship between violent and non-violent criminality on suicide?  
5  
6

7 (4) Do methods of suicide differ between the criminal groups?  
8  
9

## 10 11 **MATERIAL AND METHODS**

### 12 13 **Participants**

14  
15 This nationwide study is based on 49,398 18-20 years young Swedish men conscripted for  
16 military service from 1 July 1969 to 30 June 1970. About 2-3% was exempted from the military  
17 service mainly because of a physical or psychiatric disorder/disability. In order to get a  
18 homogenous age group we included 48,411 conscripts born 1949 to 1951. Six per cent of the  
19 conscripts were born in 1949, 18 % in 1950 and 75 % in 1951. The mean age at the end of the  
20 follow-up was about 53 years of age for the survivors.  
21  
22

### 23 24 **Measures**

#### 25 26 **Measurement of potential confounders**

27  
28 At conscription, each conscript was asked to answer two non-anonymous voluntary  
29 questionnaires. The first included questions about family and psychosocial background and  
30 health. The second about substance use including alcohol and drug use and sniffing of solvents.  
31 Studies have shown that the questionnaires have been found to have sufficient validity for  
32 epidemiological studies.[17-18]  
33

34 Besides the measures of substance use, the confounders were selected from the conscription data,  
35 based on the scientific studies and earlier studies of this cohort.[9,13,18-21]  
36

37 The confounders were: Father's occupation: social class I+II vs. social class III.  
38

39 Social class I includes proprietors, private entrepreneurs and high salaried employees in private  
40 entrepreneurs and high-income employees in private and public sectors, Social class II other  
41 incomes and small entrepreneurs, and social class III mainly blue-collar workers.[22]  
42  
43  
44  
45  
46  
47  
48  
49  
50  
51  
52  
53  
54  
55  
56  
57  
58  
59  
60

1  
2  
3 Medication for nervous problems among parents or other members in the family (yes, at least one  
4 parent or family member vs. no). Conduct problems at school (at least once vs. no). Any prior  
5 contact with police and juvenile authorities (yes at least once vs. no). Having taken medication for  
6 psychiatric disorder (at least once vs. no).  
7  
8

9  
10  
11 The psychological variables were: Emotional control and intellectual capacity were assessed by  
12 trained military psychologist who performed a structured interview with all conscripts. The  
13 psychologists used both questionnaire and interview data and the measures were assessed on a 5-  
14 point Likert scale. The ratings were regularly checked for interrater reliability, which was  
15 satisfactory.[23] If the psychologist discovered or the conscript reported any psychiatric disorder,  
16 the subject was referred to a psychiatrist and an eventual diagnosis was coded according to ICD-  
17 8.[17, 23] Details of this procedure and the validity of the assessments have been described  
18 earlier.[17, 23-25]  
19  
20

21  
22 Intellectual capacity (IQ) was based on four main intellectual and cognitive tests, measuring  
23 verbal, logical-inductive, spatial, and technical and mechanical ability. The results of the tests  
24 were aggregated in a 5-point summary score for overall intelligence, as described in detail by  
25 Ståhlberg[26] and David et al.[27] These scale of intelligence capacity was scored 1=very bad;  
26 2=bad; 3=moderate; 4=good; 5=very good and expressed as intelligence (1–3 vs. 4–5). Details of  
27 this procedure and the validity of the assessments have been described by Otto.[23]  
28  
29

30  
31 Problematic alcohol use was dichotomized (yes vs. no, with yes defined as one or more of  
32 consumption of  $\geq 210$  g pure alcohol per week, having ever taken an ‘eye-opener’, being  
33 intoxicated often, having been taking into custody for public drunkenness on at least one  
34 occasion, and non-prescription drug (ever vs. never). Drug misuse was coded (yes vs. no), with  
35 yes defined as used illicit drugs 10 times or more or any intravenous drug use.  
36  
37  
38  
39  
40  
41  
42

#### 43 **Measures of alcohol and drug misuse and suicide attempt**

44  
45  
46  
47  
48  
49  
50  
51  
52  
53  
54



1  
2  
3 Data from the National Swedish inpatient register were used to identify inpatient care with an  
4 alcohol or drug diagnosis of dependence or abuse according to ICD-8 and ICD-9 from 1987 and  
5 ICD-10 from 1997 onwards.  
6  
7

8  
9 The register includes details concerning inpatient care stays and days at hospital and diagnoses,  
10 and has covered all public hospitals in Stockholm and Uppsala County since 1972, 85% of all  
11 Swedish public inpatient care stays since 1983, and about 98–99% since 1987. The ICD  
12 classifications for hospitalization and mortality were: Drug misuse – ICD-8: 304 and 965.0; ICD-  
13 9: 304, 965A, 968F, 969G and 969H; and ICD-10: F11-12, F14, F15, F16, F18, F19, O35.5,  
14 P04.4, T40.0–T40.3, T40.5–T40.9, T43.6, Z71.5, and X42. Alcohol misuse – ICD-8: 291, 303,  
15 571.00, 571.01 and 980; ICD-9: 291, 303, 305A, 357F, 425F, 535D, 571A–571D and 980; and  
16 ICD-10: E24.4, F10, G31.2, G62.1, G72.1, I42.6, K29.2, K70, K86.0, O35.4, P04.3, Q86.0, T51,  
17 X45, Y91, Z50.2 and Z71.4. Suicide attempt: ICD-8 and ICD- 9: Determined suicide attempt:  
18 E950-E959 and undetermined E980-E989; ICD-10: Determined X60-X84 and undetermined  
19 suicide attempt: Y10-Y34.  
20  
21  
22  
23  
24  
25  
26  
27  
28  
29  
30  
31  
32  
33

### 34 **Suicide**

35  
36 Information about suicide was obtained from Cause of Death Register which provides mortality  
37 data and covers more than 99% of all deaths occurring in Sweden and is based on information  
38 from death certificates. Suicide was classified according to ICD-8 and ICD-9: E950-E959 and  
39 ICD-10: X60-X84 or as death with undetermined intent ICD-8 and ICD-9: E980-E989 and ICD-  
40 10: Y10-Y34. The same ICD-codes as for the hospital register.  
41  
42  
43  
44  
45  
46

### 47 **Measurement of crime**

48  
49 Data from the National Crime Register were used to identify date, type, and number of criminal  
50 offenses. The Crime Register contains information on all convictions in Sweden from 1966 and  
51 onwards. Criminality was divided in three categories: no crime, violent crime and non-violent  
52 crime. Violence was defined as: homicide, manslaughter and assault and non-violent crime all the  
53  
54  
55  
56  
57  
58  
59  
60

1  
2  
3 other convictions. We also categorized the cohort according to number of crimes meaning for  
4  
5 violent and non-violent offenders: (0, 1, and 2 or more crimes).  
6

7 Information about alcohol and drug inpatient-care, criminality and suicide was linked at  
8  
9 Statistics Sweden (Statistiska Centralbyrån) via the unique personal number for each individual in  
10  
11 the cohort. This personal number was then replaced with an individual serial number making the  
12  
13 data anonymous to the research group, after approval of Regional ethical review board in  
14  
15 Stockholm.  
16

### 17 18 **Statistical analyses** 19

20 Cox proportional bivariate and multivariate regression analysis was used to calculate hazard ratios  
21  
22 (HRs) with 95% confidence intervals (95% CI) for violent and non-violent criminality and  
23  
24 suicide. We adjusted for confounders measured at conscription in relation to time to suicide. The  
25  
26 surveillance time was calculated from September 1969 until death or until 31 December 2004 for  
27  
28 all subjects in the cohort.  
29

30  
31 We had no exact information whether a person had emigrated from Sweden or not during the  
32  
33 follow-up period, therefore we could not censor for emigration in the calculation of person time.  
34

35  
36 In order to investigate the association between the number of criminal offences and mortality, we  
37  
38 categorized subjects according to committed numbers of offences (0, 1, 2 and more) in relation to  
39  
40 the time to suicide by using Cox proportional regression analysis. These were measured at the  
41  
42 time of conscription and only measured once why the time order was difficult to prove. Some of  
43  
44 these variables like alcohol- or substance use could act as confounders or mediators on both  
45  
46 criminality and suicide.  
47

48  
49 A test of the proportional hazard assumption was performed for each confounder (X) in bivariate  
50  
51 and multivariate analyses by using a time-dependent explanatory variable in the model (X\*(log  
52  
53 time – average value of the log time)). If the p-value was significant (p<.05) the proportional  
54  
55 hazard assumption was not fulfilled and the variable was not included in the analyses.  
56  
57  
58  
59  
60

1  
2  
3  
4  
5 We used Kaplan-Meier survival curves to plot survival probability of suicide in non-criminals,  
6  
7 violence and other criminality during the 35 years follow-up.  
8

9  
10 Chi-square ( $X^2$ ) test was used when calculating early confounders and hospitalization in relation  
11  
12 to criminality.  
13

## 14 15 16 **RESULTS**

17  
18 Of the total cohort, 2,671 subjects (5.5%) died during the follow-up period. Of these 615 (23.6%)  
19  
20 died due to suicide (474 determined and 141 undetermined). Suicide was more prevalent in the  
21  
22 criminal groups: no criminality (4.11%), non-violent (7.3%) and violent criminality (13.7%).  
23

24  
25 The suicide cases were rather equally distributed throughout the 35 years follow-up period.  
26

27  
28 More than one third (34%) of the suicide cases were 30 years or younger, 30% were in the age  
29  
30 category 31-40 years and the remaining subjects (36%) were 41 years or older. The mean age was 36  
31  
32 years.  
33

34  
35 Table 1 shows the distribution of 11 confounders measured at conscription divided into the three  
36  
37 groups of criminals. All risk factors differed significantly ( $p < 0.0001$ ) between the groups, but mostly  
38  
39 prior contact with the police or juvenile authorities, and having had conducted problems at school.  
40

41  
42 Regarding hospitalization of alcohol or drug misuse which had occurred during the follow-up period,  
43  
44 alcohol misuse differed most significantly between the groups.  
45

### 46 **Methods of suicide**

47  
48 Poisoning was the most prevalent method of suicide ( $n=278$ ) followed by hanging and suffocation  
49  
50 ( $n=149$ ) (Table 2). The violent offenders had nearly seven times higher hazard to die from poisoning  
51  
52 ( $HR=6.92$ , 95%CI 4.91-9.76), while the non-violent criminal group had almost three times higher  
53  
54 risk ( $HR=2.94$ , 95%CI 2.26-3.81). The violent group had three times higher hazard ratio to die due to  
55  
56 shooting by firearm, while the non-violent group had no significant risk.  
57  
58  
59  
60

### Crude and multivariate analyses

Violent related criminality had the highest hazard ratio for suicide (HR=4.69, 95%CI 3.56-6.19) followed by non-violent criminality (HR=2.08, 95%CI 1.72-2.52) in bivariate analyses. After adjustment for multiple confounders, the hazard ratios decreased to nearly three (HR=2.68) and two fold (HR=1.65) respectively (Table 3). Four out of 11 of the confounders in the model e.g. low emotional control (HR=1.4), low intellectual capacity (1.36), own medication for psychiatric problems (HR=1.40) and medication for nervous problem in the family (HR=1.23) were significantly associated with suicide. In the fully adjusted model we also included alcohol and drug inpatient care stays and suicide attempt and found elevated hazard ratios, however, only significant in non-violent offenders (HR=1.35, 95%CI 1.10-1.67). All these three inpatient-care variables were associated with suicide: suicide attempt carried an hazard of 4.83, while alcohol and drug misuse had lower hazards (2.00 and 1.74, respectively).

### Repeated violent and non-violent offenders in relation to suicide

Both repeated non-violent and violent offences were associated with elevated hazard ratios of suicide in crude analyses (HR=3.27 and HR=5.40). When adjusted for early confounders the repeaters of both violent and non-violent offenders decreased to HRs=2.42 and 2.24, respectively (Table 4).

We conducted Kaplan-Meier survival distribution curves for the three criminal groups in relation to suicide from 1970 up to 2004. We found that violent criminality was associated with lower survival (Fig 1).

### DISCUSSION

One aim of this study was to analyse the association between male violent and non-violent offending and risk for suicide in a population-based cohort during a 35-years follow-up.

1  
2  
3 A main finding was that nearly one third of the death cases were due to suicide in those who had  
4  
5 ever committed a violent offence and one fourth in the non-violent group. This is in line with  
6  
7 earlier studies reporting high proportionate mortality among homicide offenders and among  
8  
9 personality-disordered offenders subject to forensic psychiatric assessment.[28-30]  
10

11  
12 Another main finding was that violent offenders had nearly five times higher crude risk and non-  
13  
14 violent offenders more than two-fold higher risk for suicide compared to non-criminals. Even after  
15  
16 controlling for multiple confounders measured at conscription the hazard ratios remained  
17  
18 significant. Alcohol and substance misuse and attempted suicide in the fully adjusted model were  
19  
20 confounding on suicide and only association between non-violent offending and suicide remained  
21  
22 significant. This implies a strong association between these clinical predictors and suicide  
23  
24 risk.[11,31] However, we do not have knowledge about the time order between criminality and the  
25  
26 clinical factors measured during the follow-up period, why we have to take the results with  
27  
28 cautions.  
29  
30

31  
32 There is some evidence in the literature that violent criminals have higher rates of suicide, but  
33  
34 these numbers are often derived from prison populations with often difficult circumstances such as  
35  
36 overcrowded cells and spaces.[32] Very few earlier studies on the association between violent and  
37  
38 non-violent criminality and suicide have been conducted in a cohort representing the general  
39  
40 population and with a long follow-up period. However, national data from England and Wales  
41  
42 found after age standardization, 9- to 13-fold increased risk for suicide in both prisoners and non-  
43  
44 custody offenders.[32]  
45  
46

47  
48 We found the suicide cases were rather equally distributed throughout the 35 years follow-up  
49  
50 period which probably means that all age categories seem to be vulnerable for suicide. Other  
51  
52 studies have shown that the yearly incidence rates of suicide have not shown a clear decrease in  
53  
54 the younger age categories in Sweden, why it is important to identify delinquency at young ages  
55  
56 and other risk factors in order to find preventive strategies for this group.[5] Generally, suicide  
57  
58  
59  
60

1  
2  
3 rates are higher among the older age groups, often due to loneliness, anxiety disorder and  
4  
5 depression.[33-34]

6  
7 Another finding was that poisoning as method of completed suicide was most prevalent in violent  
8  
9 and non-violent criminals, while hanging was the most prevalent method among non-criminals.

10  
11 That was also the case for men in the whole of Sweden.[35] In a Danish national register study of  
12  
13 9708 suicide cases and 188,134 age and gender matched living controls, hanging was the leading  
14  
15 suicide method among men, while poisoning among women.[36-37] One possible explanation to  
16  
17 the high prevalence of poisoning in criminals in our study could be that alcohol and substance use  
18  
19 was more prevalent in the criminal groups including fatal and non-fatal poisonings compared to  
20  
21 non-criminals.  
22  
23

#### 24 25 **Suicide attempt and alcohol misuse**

26  
27 We found that one third of the violent offenders were already diagnosed at conscription with a  
28  
29 psychiatric diagnosis. Psychiatric disorders are strongly related to suicide risk, whereas the  
30  
31 association between mental illness and violent crime is not as evident. King and Barraclough [38]  
32  
33 found 27 times higher risk of unnatural death (suicide, accident and undetermined) among  
34  
35 individuals who had recently been in contact with psychiatric clinics compared to those who had  
36  
37 not. Persons with severe psychiatric disorders like affective disorder and schizophrenia have  
38  
39 highly elevated lifetime suicide risk.[39-40]  
40  
41

42  
43 One out of five suicide victims in this study had attempted suicide, confirming a strong association  
44  
45 between suicide attempt and suicide. This was especially evident for violent offenders where one  
46  
47 in three had attempted suicide. Suicide attempt has been considered as one of the strongest  
48  
49 predictors of suicide and the risk seem to be elevated up to older ages and during long time  
50  
51 periods.[41] In the total cohort, we found that 1192 men (2.4%), had attempted suicide which  
52  
53 could be considered as rather low frequency when comparing with the suicides (n=615). An  
54  
55 American national study (National Survey on Drug Use and Health), based on interviews and  
56  
57  
58  
59  
60

1  
2  
3 web-questionnaires from 92,264 respondents in year 2008 and 2009, found one suicide case for  
4 every 25 attempted suicides.[42] We had data on only suicide attempts needing inpatient care,  
5 namely serious suicide attempts, which could explain the ratio. We did not have data on attempted  
6 suicides that not turn up as hospital records. Some suicide attempters do not search help at any  
7 care givers.[43-44]  
8  
9

10  
11  
12  
13  
14 In the present study, about half of the violent offenders had reported either risky alcohol or  
15 substance use at the time of conscription and nearly one third had been treated at hospital for an  
16 alcohol related diagnosis. Alcohol misuse has also been pointed out as an important risk factor for  
17 suicide and in some studies the second most common diagnostic group.[33,45] Wilcox et al.[16]  
18 found alcohol misusers having a 10-fold increase risk for suicide in a mixed-age cohort. Likewise,  
19 in a longitudinal cohort study by Flensburg-Madsen et al.[45] individuals with alcohol use  
20 disorders had eight times higher hazard ratios of suicide compared to individuals with no alcohol  
21 use. The hazard ratio fell to three after adjustment of psychiatric disorders. These findings indicate  
22 the importance of early detection and prevention strategies and treatment for substance users and  
23 especially those with suicidal tendencies in all ages.[34] The relationship between alcohol use and  
24 violence seems to be complex.[46] The fact that the suicide rate is somewhat higher in the violent  
25 criminals than non-violent criminals, one could assume that alcohol misuse play an important role  
26 for both violence and suicide.[45]  
27  
28  
29  
30  
31  
32  
33  
34  
35  
36  
37  
38  
39  
40  
41  
42

### 43 **Advantages and limitations**

44  
45 An advantage of this study is the large national cohort with a longitudinal design and with several  
46 adolescent confounders. Only a small part 2-3 % of the conscripts was excluded from the study  
47 mainly because of physical or psychiatric disorders. The two questionnaires used at conscription  
48 were non-anonymous, which could have contributed to a lower response rate of especially  
49 problematic issues such as alcohol and substance use. However, other studies on conscription  
50 cohort have compared register and self-reported information of alcohol and substance use and  
51  
52  
53  
54  
55  
56  
57  
58  
59  
60

1  
2  
3 found good agreement between the different sources of data. [24] A small number of the  
4  
5 conscripts missed one or some of the items in the questionnaires. That was especially evident for  
6  
7 those subjects who had committed violent offences whereas the response rate for the confounders  
8  
9 included in the study varied from 0.26 to 9.45%. The corresponding measures for other criminality  
10  
11 and non-criminals were: 0.20 to 6.37% and 0.13 to 4.19%. The violent offenders had probably  
12  
13 more severe risk factors than the non-violent and non-criminal groups which could have resulting  
14  
15 in underestimating of the hazard ratios of suicide. One could assume that these subjects also had  
16  
17 higher rates of substance use and other maladjusted behaviour measured at conscription which in  
18  
19 turn could have affected the outcome.[47] However, we have no reason to believe that the risk for  
20  
21 the outcome, suicide, has been considerable affected due the internal missing data.  
22  
23

24  
25 Another limitation of this study is that we do not have information about criminality not turning  
26  
27 up in the register. Some subjects could have committed many violent and non-violent crimes,  
28  
29 especially in combination with substance misuse, and never been convicted of a crime.  
30

### 31 **Conclusions**

32  
33 We found that individuals registered for either violent or other criminality are at increased risk for  
34  
35 committing suicide and that is especially evident for those who were criminal repeaters. However,  
36  
37 after adjusting for confounders measured at conscription the risk was still elevated and just  
38  
39 slightly significant or non-significant in the fully adjusted model including hospitalization due to  
40  
41 alcohol and substance misuse and suicide attempt. The two criminal groups were more likely to  
42  
43 use poisoning as suicide method indicating prior experiences of substance misuse. Hanging was  
44  
45 most prevalent in the non-criminal group which is in line with the general population in Sweden.  
46  
47 [35] We suggest that authorities and the health care should observe the increased risk for suicide  
48  
49 in both violent and non-violent criminals, especially those with earlier suicide attempt and  
50  
51 comorbid alcohol and substance misuse.  
52  
53  
54  
55  
56  
57  
58  
59  
60



1  
2  
3 **Acknowledgements** We want to thank statistician Anders Leifman for the valuable statistical  
4  
5 advice.

6  
7 **Competing interests:** none.

8  
9 **Funding:** The research for this study was supported by Co-ordination of the Swedish Drug Policy  
10  
11 (Dnr 238/2006:18), by the Swedish Research Council (Project numbers: K2009-61P-21304-04-4;  
12  
13 K2009-61X-21305-01-1) and through the regional agreement on medical training and clinical  
14  
15 research (ALF) between Stockholm County Council and Karolinska Institutet, Stockholm Centre  
16  
17 for Psychiatric Research and Education.

18  
19 **Contributors:** MS planned the study, conducted the statistical analyses and wrote the final  
20  
21 version of the manuscript. AS contributed to the planning and data analyses. JJ and AR  
22  
23 contributed to the planning of the study and preparing of the manuscript. All authors contributed  
24  
25 to the final draft of the manuscript.

26  
27 **Ethics approval:** Regional ethical review board in Stockholm. (Dnr 2007/174-31, Dnr  
28  
29 2008/1086-31/5).

30  
31 **Data sharing:** No additional data available.

32  
33  
34  
35  
36  
37  
38 **Figure legend:**

39  
40 Fig 1. Kaplan-Meier survival plot for suicide in violent and non-violent criminals  
41  
42  
43  
44  
45  
46  
47  
48  
49  
50  
51  
52  
53  
54  
55  
56  
57  
58  
59  
60

**Reference**

1. World Health Organization, World suicide prevention day 2012. <http://www.who.int/mediacentre/events/annual/world-suicide-prevention-day/en/>
1. Bertolote JM, Fleischmann A. A global perspective on the magnitude of suicide mortality. In: D Wasserman and C Wasserman (eds.). *Oxford Textbook of Suicidology and Suicide Prevention: a global perspective*. Oxford: Oxford University Press.2009;91-98.
2. Patton GC, Coffey C, Sawyer SM et al. Global patterns of mortality in young people: a systematic analysis of population health data. *Lancet* 2009;**374**: 881-892.
3. Karimina A, Law MG, Butler TG et al. Suicide risk among recently released prisoners in New South Wales, Australia. *Med J Aust* 2007;**18**:387-390.
4. Fazel S, Benning R, Danesh J. Suicides in male prisoners in England and Wales, 1978-2003. *Lancet* 2005;**366**:1301-2.
5. Webb R, Qin P, Stevens H. National study of suicide in all people with a criminal justice history. *Arch Gen Psychiatr* 2011;**68**,591-9.
6. Hayes LM. National study of jail suicides: seven year later. *Psychiatr Q* 1989;**60**:7-29.
7. Boardman AP, Grimbaldeston AH, Handley C. et. al. The North Staffordshire Suicide Study: a case-control study of suicide in one health district. *Psychol Med* 1999;**29**:27- 33.
8. Linsley KR, Johnson N, Martin J. Police contact within 3 months of suicide and associated health service contact. *Br J Psychiatry* 2007;**190**:170-1.
9. Björkenstam E, Björkenstam C, Vinnerljung B et al. Juvenile delinquency, social background-a Swedish national cohort study of 992881 young adults. *Int J Epidemiol* 2011;**40**:1585-92.
10. Harris EC, Barraclough B. Suicide as an outcome for mental disorders. A meta-analysis. *Br J Psychiatry* 1997;**170**:205-28.

- 1  
2  
3 11. Tidemalm D, Långström N, Lichtenstein P. et al., Risk of suicide after suicide attempt  
4 according to coexisting psychiatric disorder: Swedish cohort study with long term follow-up. BMJ  
5 2008;**337**:a2205doi:10.1136/bmj.a2205.  
6  
7
- 8  
9 12. Runeson B, Tidemalm D, Dahlin M et al. Method of attempted suicide as predictor of  
10 subsequent successful suicide: national long term cohort study. BMJ 2010;  
11  
12 **340**:c3222doi:10.1136/bmj.c3222.  
13  
14
- 15 13. Stenbacka M, Moberg T, Romelsjö A et al. Mortality and causes of death among violent  
16 offenders and victims - a Swedish population based longitudinal study. BMC public health  
17 2012;**12**:1-10.  
18  
19
- 20 14. Darke S, Douflou J, Torok M. Toxicology and circumstances of completed  
21 suicide by means other than overdose. J Forensic Sci 2009;**54**:490-4.  
22  
23
- 24 15. Darke S, Dufrou J, Totok M. Toxicology and characteristics of fatal oxycodone toxicity cases  
25 in New South Wales, Australia 1999-2008. J Forensic Sci 2011;**56**:690-3.  
26  
27
- 28 16. Wilcox HC, Conner KR, Caine ED. Association of alcohol and drug use disorders and  
29 completed suicide: an empirical review of cohort studies. Drug Alc Depend 2004;**7**:11-19.  
30  
31
- 32 17. Allebeck P, Allgulander C, Fisher LD. Predictors of completed suicide in a cohort of 50465  
33 young men: role of personality and deviant behaviour. BMJ 1988;**297**:176-178.  
34  
35
- 36 18. Andreasson S, Allebeck P, Romelsjö A. Alcohol and mortality among young men.  
37 Longitudinal study of Swedish conscripts. Br Med J 1988;**296**:1021-5.  
38  
39
- 40 19. Eriksson A, Romelsjö A, Stenbacka M. et al. Early risk factors for criminal offending in  
41 schizophrenia: a 35-year longitudinal cohort study. Soc Psychiatr Epidemiol. 2011 **46**:925-32.  
42  
43
- 44 20. Stenbacka M, Leifman L, Dalal K, et al.. Early Predictors of Injury Mortality among Swedish  
45 Conscripts:A 35-Year Follow-up Study. Accid Anal Prev 2011;**43**:228-34.  
46  
47
- 48 21. Davstad I, Allebeck P, Leifman A et al. Self-reported drug use and mortality among a  
49 nationwide sample of Swedish conscripts – A 35-year follow-up. Drug Alc Depend 2011;  
50  
51  
52  
53  
54  
55  
56  
57  
58  
59  
60

- 1  
2  
3 22. Uppmark M, Karlsson G, Romelsjö A. Drink driving and criminal behaviours as risk factors  
4 for receipt of disability pension and sick leave: a prospective study of young men. *Addiction*  
5 94:507-19. **118**:383-90.  
6  
7  
8  
9  
10 23. Otto U: Male youths. A sociopsychiatric study of a total annual population of Swedish  
11 adolescent boys. *Acta Psychiatr Scand* 1976;Suppl **264**:1-312.  
12  
13 24. Benson G, Holmberg MB: Validity of questionnaire in population studies on drug use. *Acta*  
14 *Psychiatr Scand* 1985;**70**:9-18.  
15  
16 25. Rydelius P-A. Alcohol-abusing teenage boys. *Acta Psychiatr Scand* 1983;**68**:368-80.  
17  
18 26. Ståhlberg B. I-provet (intelligence test: the Swedish enlistment battery). Karlstad.  
19 *Militärpsykologiska Institutet*. 1971. (In Swedish)  
20  
21 27. David AS, Malmberg L, Brandt L et al. 1997. IQ and risk for schizophrenia: a population-  
22 based cohort study. *Psychol Med* 1997;**27**:1311-23.  
23  
24 28. Kullgren G, Tengström A, Grann M. Suicide among personality-disordered offenders: a  
25 follow-up study of 1943 male criminal offenders. *Psychiatr Epidemiol* 1998;**33**:102-6.  
26  
27 29. Jokinen J, Forslund K, Nordström AL et al. Suicide risk after homicide in Sweden. *Arch*  
28 *Suicide Res* 2009; **13**:297-301.  
29  
30 30. Jokinen J, Forslund K, Ahnemark E et al. Karolinska Interpersonal Violence Scale predicts  
31 suicide in suicide attempters. *J Clin Psychiatry* 2010; **71**:1025-1032.  
32  
33 31. Waern M. Risk factors for suicide in the elderly: What do we know? What do we need to find  
34 out? *Suicidologi* 2011;**16**:2:3-8.  
35  
36 32. Sattar G. Rates and causes of death among prisoners and offenders under community  
37 supervision. Home Office Research Study. London Home Office. 2001;231.  
38  
39 33. Waern M. Alcohol dependence and abuse in elderly suicides. *Alcohol and Alcoholism*  
40 2003;**38**:249-254.  
41  
42  
43  
44  
45  
46  
47  
48  
49  
50  
51  
52  
53  
54  
55  
56  
57  
58  
59  
60

- 1  
2  
3 34. Whiteford HA, Degenhardt L, Rehm J et al. Global burden of disease attributable to mental  
4 and substance use disorders: findings from the Global Burden of Disease Study 2010.  
5 Lancet 2013;28. doi:pii: S0140-6736(13)61611-6. 10.1016/S0140-6736(13)61611-6.  
6  
7  
8  
9  
10 35. National Board on Health and Welfare, The Cause of Death Register, 2012.  
11  
12 36. Webb RT, Qin P, Stevens H, Shaw J, Appleby L, Mortensen PB. National study of suicide  
13 method in violent criminal offenders. J Affect Disord 2013; [http://dx.doi.org/  
14 10.1016/j.jad.2013.04.001].  
15  
16  
17  
18 37. Titelman D, Oskarsson H, Wahlbeck K et al. Suicide mortality trends in the Nordic countries  
19 1980–2009. Nord J Psychiatry 2013;1–10.23293897.  
20  
21  
22  
23 38. King E, Barraclough B. Violent death and mental illness: A study of a single catchment area  
24 over eight years. Br J Psychiatry 1990;156:714-20.  
25  
26  
27  
28 39. Carlborg A, Winnerbäck K, Jönson EG. et al. Suicide in schizophrenia. Expert Review of  
29 Neurotherapeutics 2010;10,1153–1164.  
30  
31  
32 40. Nordentoft M, Mortensen PB, Pedersen CB. Absolute risk of suicide after first hospital contact  
33 in mental disorder. Arch Gen Psychiatry. 2011;68(10):1058-64.  
34  
35  
36  
37 41. Suominen K, Isometsa E, Suokas J et al. Completed suicide after a suicide attempt: a 37-year  
38 follow-up study. Am J Psychiatry 2004;161:562-563.  
39  
40  
41 42. Crosby AE, Han B, Ortega LAG et al. Suicidal thoughts and behaviors among adults aged ≥18  
42 years-United States, 2008-2009. MMWR Surveillance Summaries 2011;60(no. SS-13).  
43  
44  
45 43. Guilherme B, Jules A, Nock MK et al. Risk factors for twelve-month suicide attempts in the  
46 National Comorbidity Survey Replication (NCS-R). Psychol Med 2006;36:1747–57.  
47  
48  
49 44. De Leo D, Ester C, Kym S et al. Lifetime risk of suicide ideation and attempts in an Australian  
50 community: Prevalence, suicidal process, and help-seeking behaviour. 2005;86:215–24.  
51  
52  
53  
54  
55  
56  
57  
58  
59  
60

- 1  
2  
3 45. Flensburg-Madsen T, Knop J, Mortensen EL et al. Alcohol use disorders increase the risk of  
4 completed suicide—Irrespective of other psychiatric disorders. A longitudinal cohort study.  
5  
6 Psychiatry Research 2009;**167**:123–130.  
7  
8  
9  
10 46. Lipsey MW, Wilson DB, Cohen MA, Derzon JH: Is there a causal relationship between  
11 alcohol use and violence? A synthesis of evidence. Recent Dev Alcohol 1997;**13**:245-82.  
12  
13 47. Stattin H, Romelsjö R, Stenbacka M. Personal resources as modifiers of the risk for future  
14 criminality: an analysis of protective factors in relation to 18-year-old boys. Br J Criminol  
15  
16 1997;**37**:198–223.  
17  
18  
19  
20  
21  
22  
23  
24  
25  
26  
27  
28  
29  
30  
31  
32  
33  
34  
35  
36  
37  
38  
39  
40  
41  
42  
43  
44  
45  
46  
47  
48  
49  
50  
51  
52  
53  
54  
55  
56  
57  
58  
59  
60

| Table 1. Baseline characteristics and hospitalization in relation to non-violent and violent criminality |               |                         |                     |                   |
|----------------------------------------------------------------------------------------------------------|---------------|-------------------------|---------------------|-------------------|
|                                                                                                          | No crime      | Non-violent criminality | Violent criminality | Chisq, prob. **)  |
| Fathers' social class                                                                                    |               |                         |                     |                   |
| III                                                                                                      | 15433 (47.67) | 7146 (50.38)            | 1321(58.07)         |                   |
| I-II                                                                                                     | 15680 (48.43) | 6133 (43.24)            | 739(32.48)          | 204.72,p<0.0001   |
| Missing *)                                                                                               | 1262 ( 3.90)  | 904 (6.37)              | 215(9.45)           |                   |
| Medication for nervous problems in the family                                                            |               |                         |                     |                   |
| Yes (parents or other family members)                                                                    | 9747(30.11)   | 4897(34.53)             | 918(40.35)          |                   |
| No                                                                                                       | 21698(67.02)  | 8738(61.61)             | 1231(54.11)         | 201.34, p<0.0001  |
| Missing                                                                                                  | 931(2.88)     | 548(3.86)               | 126(5.54)           |                   |
| Conduct problems at school                                                                               |               |                         |                     |                   |
| Yes (at least once)                                                                                      | 5726 (17.69)  | 4743 (33.44)            | 1188 (52.22)        |                   |
| No                                                                                                       | 26352 (81.39) | 9226 (65.05)            | 1034 (45.45)        | 2470.41, p<0.0001 |
| Missing                                                                                                  | 298 (0.92)    | 214 (1.51)              | 53(2.33)            |                   |
| Taken medication for psychiatric problems                                                                |               |                         |                     |                   |
| Yes                                                                                                      | 3217(9.94)    | 1858(13.10)             | 456(20.04)          |                   |
| No                                                                                                       | 28821(89.02)  | 12087(85.22)            | 1757(77.23)         | 293,35, p<0.0001  |

|                                                 |               |               |              |                   |
|-------------------------------------------------|---------------|---------------|--------------|-------------------|
| Missing                                         | 338(1.04)     | 238(1.68)     | 62(2.73)     |                   |
| Emotional control                               |               |               |              |                   |
| Very bad, bad                                   | 8677 (26.8)   | 4941(34.84)   | 1135(49.89)  |                   |
| Very good, good,<br>medium                      | 23471(72.6)   | 9094(64.12)   | 1097 (48.22) | 769.81, p<0.0001  |
| Missing                                         | 228(0.70)     | 148(1.04)     | 43(1.89)     |                   |
| Intellectual capacity (IQ)                      |               |               |              |                   |
| Below average                                   | 5190 (16.03)  | 3296(23.24)   | 812(35.69)   |                   |
| Above average, average                          | 27145(83.84)  | 10859(76.56)  | 1457(64.04)  | 764.81,p<0.0001   |
| Missing                                         | 41(0.13)      | 28(0.20)      | 6 (0.26)     |                   |
| Psychiatric diagnosis (at<br>conscriptioin)     |               |               |              |                   |
| Yes (at least one<br>diagnosis)                 | 3151 (9.73)   | 2251 (15.87)  | 679 (29.85)  |                   |
| No                                              | 28679 (88.58) | 11639 (82.06) | 1559 (68.53) | 1008.59, p<0.0001 |
| Missing                                         | 546 (1.69)    | 293 (2.07)    | 37(1.63)     |                   |
| Contact with police and<br>juvenile authorities |               |               |              |                   |
| Yes (several or some<br>times)                  | 6726 (20.77)  | 5585 (39.38)  | 1458 (64.09) |                   |
| No                                              | 25208 (77.86) | 8314 (58.62)  | 754 (33.14)  | 3305.72, p<0.0001 |
| Missing                                         | 442 (1.37)    | 284 (2.00)    | 63 (2.77)    |                   |
| Risky alcohol use                               |               |               |              |                   |
| Yes                                             | 2683 (8.29)   | 2807(19.79)   | 901(39.60)   |                   |



|                                         |              |              |             |                    |
|-----------------------------------------|--------------|--------------|-------------|--------------------|
| No                                      | 29279(90.43) | 11119(78.40) | 1310(57.58) | 2681.86, p<0.0001  |
| Missing                                 | 414(1.28)    | 257(1.81)    | 64(2.91)    |                    |
| Dug misuse                              |              |              |             |                    |
| Yes                                     | 585 (1.81)   | 919(6.48)    | 248(10.9)   |                    |
| No                                      | 30410(94.00) | 12533(88.37) | 1864(81.93) | 1063, 23, p<0.0001 |
| Missing                                 | 1381(4.27)   | 731(5.15)    | 163(7.16)   |                    |
| Sniffing                                |              |              |             |                    |
| At least once                           | 3187(9.84)   | 2614(18.43)  | 673(29.58)  |                    |
| No                                      | 28756(88.82) | 11259(79.38) | 1520(66.81) | 1234.54, p<0.0001  |
| Missing                                 | 433(1.34)    | 310(2.19)    | 82(3.60)    |                    |
| <b>Hospitalization</b>                  |              |              |             |                    |
| Alcohol hospitalization                 |              |              |             |                    |
| Yes (at least once)                     | 571(1.76)    | 1524(10.75)  | 727(31.96)  |                    |
| No                                      | 31805(98.24) | 12659(89.25) | 1548(68.04) | 4464.28, p<.00001  |
| Drug use hospitalization                |              |              |             |                    |
| Yes (at least once)                     | 50,(0.15)    | 352(2.48)    | 265(11.65)  |                    |
| No                                      | 32326(99.85) | 13831(97.52) | 2010(88.35) | 2269.25, p<.00001  |
| Hospitalization for<br>suicide attempts |              |              |             |                    |
| Yes (at least once)                     | 303(0.94)    | 581(4.10)    | 308 (13.54) |                    |
| No                                      | 32073(99.06) | 13602(95.90) | 1967(86.46) | 1647.76, p<0.0001  |

\*) No answers were given to this item

\*\* ) p-value calculated for non-missing observations

1  
2  
3  
4  
5  
6  
7  
8  
9  
10  
11  
12  
13  
14  
15  
16  
17  
18  
19  
20  
21  
22  
23  
24  
25  
26  
27  
28  
29  
30  
31  
32  
33  
34  
35  
36  
37  
38  
39  
40  
41  
42  
43  
44  
45  
46  
47  
48  
49  
50  
51  
52  
53  
54  
55  
56  
57  
58  
59  
60

| Table 2. Suicide methods related to violent and non-violent criminality. Cox proportional regression analyses. |                   |                   |
|----------------------------------------------------------------------------------------------------------------|-------------------|-------------------|
| Methods of suicide                                                                                             | Crime             | HR , 95% CI       |
| Poisoning (n=278):<br>E950-E952, E980-E982, X60-X69, Y10-Y19                                                   | No crime          | 1.0               |
|                                                                                                                | Non-violent crime | 2.94, 2.26-3.81   |
|                                                                                                                | Violent crime     | 6.92, 4.91-9.76   |
| Hanging/suffocation (n=149): E953, E983, X70, Y20                                                              | No crime          | 1.0               |
|                                                                                                                | Non-violent crime | 1.28, 0.90-1.83   |
|                                                                                                                | Violent crime     | 2.54, 1.47-4.40   |
| Firearm (n=69):<br>E955,E985, X722-X74, Y422-Y424                                                              | No crime          | 1.0               |
|                                                                                                                | Non-violent crime | 1.39, 0.83-2.34   |
|                                                                                                                | Violent crime     | 3.08, 1.44-6.60   |
| Drowning (n=41):<br>E954, E984, X71,Y21                                                                        | No crime          | 1.0               |
|                                                                                                                | Non-violent crime | 1.62, 0.82-3.20   |
|                                                                                                                | Violent crime     | 5.17, 2.19-12.24  |
| Jump from heights (n=27):<br>E957, E987, X80, Y30                                                              | No crime          | 1.0               |
|                                                                                                                | Non-violent crime | 3.23,1.43-7.26    |
|                                                                                                                | Violent crime     | 4.41, 1.21-16.00  |
| Moving train (n=22):<br>E9580, E9880, X81, Y31                                                                 | No crime          | 1.0               |
|                                                                                                                | Non-violent crime | 2.07, 0.84- 5.10  |
|                                                                                                                | Violent crime     | 4.40, 1.21- 15.98 |
| Cutting (n=16):<br>E956, E986,X79,Y28                                                                          | No crime          | 1.0               |
|                                                                                                                | Non-violent crime | 4.61, 1.58-13.50  |
|                                                                                                                | Violent crime     | 2.95, 0.35-25.23  |
| Others (n=13):<br>E958-959,E988-989, X75-X77, X79, X82-X84, Y425-Y27, Y29, Y32-Y34                             | No crime          | 1.0               |
|                                                                                                                | Non-violent crime | 2.32, 0.67-8.01   |
|                                                                                                                | Violent crime     | 8.99, 2.15-37.63  |

1  
2  
3  
4  
5  
6  
7  
8  
9  
10  
11  
12  
13  
14  
15  
16  
17  
18  
19  
20  
21  
22  
23  
24  
25  
26  
27  
28  
29  
30  
31  
32  
33  
34  
35  
36  
37  
38  
39  
40  
41  
42  
43  
44  
45  
46  
47  
48  
49  
50  
51  
52  
53  
54  
55  
56  
57  
58  
59  
60

| Table 3. Criminality in relation to suicide adjusted for early risk factors measured at conscription <sup>1)</sup> and in addition adjusted for alcohol and drug inpatient and suicide attempt <sup>2)</sup> . |                |              |                 |                           |                           |
|----------------------------------------------------------------------------------------------------------------------------------------------------------------------------------------------------------------|----------------|--------------|-----------------|---------------------------|---------------------------|
| Suicide                                                                                                                                                                                                        |                |              |                 |                           |                           |
| N=615                                                                                                                                                                                                          |                |              |                 |                           |                           |
| Criminality                                                                                                                                                                                                    | No. of exposed | No. of cases | HR Crude        | HR Adjusted <sup>1)</sup> | HR Adjusted <sup>2)</sup> |
| Never                                                                                                                                                                                                          | 32376          | 275          | 1.0             | 1.0                       | 1.0                       |
| Non-violent                                                                                                                                                                                                    | 14183          | 252          | 2.08, 1.72-2.52 | 1.65, 1.35- 2.01          | 1.35, 1.10- 1.67          |
| Violent                                                                                                                                                                                                        | 2275           | 88           | 4.69, 3.56-6.19 | 2.68, 1.98-3.64           | 1.30, 0.92-1.82           |

<sup>1)</sup> adjusted for fathers' social class, medication for nervous problems in the family, conduct problems at school, own medication for psychiatric disorder, contact with police and juvenile authorities, emotional control, intellectual capacity, psychiatric diagnosis at conscription, sniffing of solvents, risky alcohol misuse and substance misuse. <sup>2)</sup> In addition adjusted for alcohol and drug inpatient and suicide attempt.

| Table 4. Violent and non-violent offences and suicide. Bivariate and multivariate Cox proportional regression analyses. |                 |                           |                           |
|-------------------------------------------------------------------------------------------------------------------------|-----------------|---------------------------|---------------------------|
| SuicideN=615                                                                                                            |                 |                           |                           |
| Criminality                                                                                                             | HR Crude        | HR Adjusted <sup>1)</sup> | HR Adjusted <sup>2)</sup> |
| Non-violent offence                                                                                                     |                 |                           |                           |
| 0 offence (n=32376, 66.30%)                                                                                             | 1.0             | 1.0                       | 1.0                       |
| 1 offence (n=7322, 14.99%)                                                                                              | 1.46, 1.15-1.85 | 1.25, 0.96-1.63           | 1.18, 0.91-1.55           |
| 2+ offences (n=9136, 18.71%)                                                                                            | 3.27, 2.75-3.88 | 2.24, 1.81-2.77           | 1.49, 1.17-1.89           |
| Violent offence                                                                                                         |                 |                           |                           |
| 0 offence (n=46559, 95.34%)                                                                                             | 1.0             | 1.0                       | 1.0                       |
| 1 offence (n=1556, 3.19%)                                                                                               | 2.65, 1.96-3.58 | 1.83, 1.29-2.59           | 1.17, 0.82-1.67           |
| 2+ offence (n=719, 1.47%)                                                                                               | 5.40, 3.94-7.39 | 2.42, 1.61-2.59           | 0.84, 0.54-1.31           |

<sup>1)</sup> adjusted for fathers' social class, medication for nervous problems in the family, conduct problems at school, own medication for psychiatric disorder, contact with police and juvenile authorities, emotional control, intellectual capacity, psychiatric diagnosis at conscription, sniffing of solvents, risky alcohol misuse and substance misuse. <sup>2)</sup> In addition adjusted for alcohol and drug inpatient and suicide attempt.

1  
2  
3  
4  
5  
6  
7  
8  
9  
10  
11  
12  
13  
14  
15  
16  
17  
18  
19  
20  
21  
22  
23  
24  
25  
26  
27  
28  
29  
30  
31  
32  
33  
34  
35  
36  
37  
38  
39  
40  
41  
42  
43  
44  
45  
46  
47  
48  
49  
50  
51  
52  
53  
54  
55  
56  
57  
58  
59  
60

For peer review only

## Criminality and Suicide—A longitudinal Swedish Cohort Study

Stenbacka M.,<sup>1,2</sup> Sidorchuk A.,<sup>2</sup> Romelsjö A.,<sup>2</sup> Jokinen J.,<sup>3</sup>

1). Addiction Center Stockholm, S:t Eriks Hospital Polhemsgatan 60, 112 82 Stockholm, Sweden.

2). Department of Public Health Sciences, Karolinska Institute, Widerströmska Building, 171 76 Stockholm, Sweden.

3). Department of Clinical Neuroscience, Karolinska Institute, Karolinska University Hospital Solna, 171 76 Stockholm, Sweden.

**Keywords: criminality, risk factors, substance use, violence, suicide**

**Word count: 3640**

## ABSTRACT

**Objectives:** This study aimed to investigate whether both violent and non-violent offending was related to elevated risk of suicide. We also investigated if the risk was higher among those with repeated offences and how experiences of substance abuse and suicide attempt modified the relationship.

**Design:** A nationwide prospective cohort study.

**Setting:** A register study of 49,398 conscripted men in 1969/70 in Sweden followed up during a 35-years period in official registers.

**Participants:** A Birth cohort of 49,398 men who were mandatory conscripted for military service in 1969/70 at age of 18-20 years. Possible confounders were retrieved from psychological assessments at conscription and the cohort was linked to mortality and hospitalization and crime records from 1970 and onwards. Estimates of suicide risks were calculated as hazard ratio (HR) with 95% confidence intervals (CI) using Cox proportional regression analyses with adjustment for potential confounding by family, psychological and behavioural factors including substance use and psychiatric disorders.

**Results:** Of the total cohort 2,671 (5.5%) persons died during the follow-up period. Of these 615 (23.6%) died due to suicide. Non-violent criminality was evident for 29.0% and violent criminality for 4.7% of all the participants. In the crude model, the violent offenders had nearly five times higher risk (HR=4.80, 3.73-6.19) to die from suicide and non-violent criminals about two (HR=2.14, 1.79-2.56). In the fully adjusted model the hazard ratios were still significant for suicide.

**Conclusions:** Experiences of violent or non-violent criminality were associated with increased risk of suicide. Co-morbidity with alcohol and substance use and psychiatric disorders modified the risk, but the suicide risk remained significantly elevated for non-violent criminals. It is crucial to identify offenders and especially repeated offenders who also suffer from alcohol or substance misuse and psychiatric illness in clinical settings in order to prevent suicide.

## ARTICLE SUMMARY

**Article focus**

The aim of this cohort study was to analyse the association between violent and non-violent criminality and suicide in a large population based cohort of 49.398 18-20 years Swedish male conscripts followed-up for 35 years. Early confounders were collected through two questionnaires and interviews regarding psychosocial conditions including alcohol and substance use. Criminality, suicide attempt and suicide data were collected through official registers.

**Key messages**

- In Cox proportional regression analyses, the violent offenders had nearly five times higher hazard ratio to die from suicide and non-violent criminals about two. After controlling for early covariates, the hazard ratios still remained significant for suicide.
- Suicide attempt, severe alcohol and substance use measured at follow-up modified the risk of criminality on suicide.
- Poisoning as a suicide method was most prevalent in the criminal groups, while hanging in the non-criminals.

**Strengths and limitations of this study**

- The study is based on a large national cohort with a longitudinal design and with several adolescent confounders. Only a small part 2-3 % of the participants was excluded from the study mainly because of physical or psychiatric disorder/disability.
- This study adds knowledge about the association between violent and non-violent criminality and the risk of suicide.
- The limitations were that non-anonymous questionnaires were used, which may have contributed to a lower response rate of especially problematic issues such as alcohol and substance use, but the response rate was nevertheless high.



## INTRODUCTION

Almost one million people worldwide die from suicide every year. Suicide was accounted for 1.8% of the total disease burden in 1998 and has been estimated to be 2.4% by 2020.[1] Further, suicide is one of the three leading causes of mortality in the age category 15-44 years and the second among those aged 15-19.[2]

Earlier studies on the relationship between criminality and suicide have been mostly conducted on populations in prison or newly released from prison.[3-6] Studies have found an elevated risk of 5 to 9 and in some studies much higher depending on the age group for suicide among prison inmates compared to the general population and more than a third of the male suicide cases had a history of criminality.[5-6]

Studies of suicide among offenders who are not in prisons are rather few, but an elevated risk in this population has also been reported.[7-8] Webb et al. examined suicide risk among people processed by Danish criminal justice system in a nested case-control study of 27,219 suicide cases and 524,899 matched living controls over 3 decades. More than one third of the male cases had a criminal history and when comparing with the general population custodial sentence, and psychiatric treatment and violent offences were important predictors for suicide.[5]

In a Swedish national cohort study of 992 881 young adults found that both female and male repeated offenders had a suicide risk of about six times higher than non-offenders. [9] Young female offenders had a risk of 3.7 and young male offenders had a risk of 3.0 after control for psychiatric in-patient care and for substance abuse until the end of the follow-up.[9]

A suicide attempt has been considered as the strongest predictor of the subsequent suicide. The suicide risk after an attempt was up to 40 times the expected rate[10] and lifetime prevalence suicide rates of suicide attempters with severe coexistent psychiatric disorder were even higher.

[11]

1  
2  
3 In a Swedish national register based study, it was found that patients who had attempted suicide by  
4 hanging evinced highest risk for suicide in one year after the attempt.[12]  
5

6  
7 Studies on risk factors for suicide have stressed the importance of substance misuse for elevated  
8 mortality rates.[13-14] In most studies suicide is far more prevalent in substance users than in the  
9 general population. For instance, Darke et al.[15] found that about one third of the substance  
10 misusers had experiences of suicide attempts. Suicide among opioid misusers has been estimated  
11 to be 14 times higher than the general population.[10,16] Further, one fifth or more of the suicide  
12 cases had substances presented in the blood in one study.[15]  
13

14  
15 A previous study on the Swedish conscripts with a 13-years follow-up revealed that social and  
16 behavioural factors and neurotic and personality disorder measured at conscription were most  
17 significantly associated with high rate of suicide.[17] Likewise, a longitudinal study of offenders  
18 and victims of violence and cause specific mortality showed that the hazard ratio for suicide risk  
19 was about two after adjustment for various psychosocial confounders.[13]  
20

21  
22 In this representative, nationwide, general population study we followed 49,398 Swedish  
23 conscripts during 35 years, in order to examine whether violent and non-violent offending were  
24 related to elevated risk of suicide. We also investigated if the risk was higher among those with  
25 repeated offences and how substance abuse and suicide attempt history modified the relationship.  
26 Moreover, we studied the choice of suicide methods for the violent and non-violent criminal  
27 groups.  
28  
29

30  
31 This study aimed to address four main research questions:

- 32  
33  
34  
35  
36  
37  
38  
39  
40  
41  
42  
43  
44  
45  
46  
47  
48  
49 (1) Do conscripts with violent or non-violent criminality offences differ in respect to risk of  
50 suicide?  
51  
52  
53  
54 (2) Does suicide risk increase with repeated offences?  
55  
56  
57  
58  
59  
60

1  
2  
3 (3) Does history of previous suicide attempt and/or serious substance and alcohol misuse modify  
4 the relationship between violent and non-violent criminality on suicide?  
5  
6

7 (4) Do methods of suicide differ between the criminal groups?  
8  
9

## 10 11 MATERIAL AND METHODS

### 12 13 Participants

14  
15  
16 This nationwide study is based on 49,398 18-20 years young Swedish men conscripted for  
17  
18 military service from 1 July 1969 to 30 June 1970. About 2-3% was exempted from the military  
19  
20 service mainly because of a physical or psychiatric disorder/disability. In order to get a  
21  
22 homogenous age group we included 48,411 conscripts born 1949 to 1951. Six per cent of the  
23  
24 conscripts were born in 1949, 18 % in 1950 and 75 % in 1951. The mean age at the end of the  
25  
26 follow-up was about 53 years of age for the survivors.  
27  
28

### 29 30 Measures

#### 31 32 Measurement of potential confounders

33  
34 At conscription, each conscript was asked to answer two non-anonymous voluntary  
35  
36 questionnaires. The first included questions about family and psychosocial background and  
37  
38 health. The second about substance use including alcohol and drug use and sniffing of solvents.  
39  
40 Studies have shown that the questionnaires have been found to have sufficient validity for  
41  
42 epidemiological studies.[17-18]  
43

44  
45 Besides the measures of substance use, the confounders were selected from the conscription data,  
46  
47 based on the scientific studies and earlier studies of this cohort.[9,13,18-21]  
48

49  
50 The confounders were: Father's occupation: social class I+II vs. social class III.

51  
52 Social class I includes proprietors, private entrepreneurs and high salaried employees in private  
53  
54 entrepreneurs and high-income employees in private and public sectors, Social class II other  
55  
56 incomes and small entrepreneurs, and social class III mainly blue-collar workers.[22]  
57  
58  
59  
60

1  
2  
3 Medication for nervous problems among parents or other members in the family (yes, at least one  
4 parent or family member vs. no). Conduct problems at school (at least once vs. no). Any prior  
5 contact with police and juvenile authorities (yes at least once vs. no). Having taken medication for  
6 psychiatric disorder (at least once vs. no).  
7  
8

9  
10  
11 The psychological variables were: Emotional control and intellectual capacity were assessed by  
12 trained military psychologist who performed a structured interview with all conscripts. The  
13 psychologists used both questionnaire and interview data and the measures were assessed on a 5-  
14 point Likert scale. The ratings were regularly checked for interrater reliability, which was  
15 satisfactory.[23] If the psychologist discovered or the conscript reported any psychiatric disorder,  
16 the subject was referred to a psychiatrist and an eventual diagnosis was coded according to ICD-  
17 8.[17, 23] Details of this procedure and the validity of the assessments have been described  
18 earlier.[17, 23-25]  
19  
20  
21  
22  
23  
24  
25  
26  
27  
28

29 Intellectual capacity (IQ) was based on four main intellectual and cognitive tests, measuring  
30 verbal, logical-inductive, spatial, and technical and mechanical ability. The results of the tests  
31 were aggregated in a 5-point summary score for overall intelligence, as described in detail by  
32 Ståhlberg[26] and David et al.[27] These scale of intelligence capacity was scored 1=very bad;  
33 2=bad; 3=moderate; 4=good; 5=very good and expressed as intelligence (1–3 vs. 4–5). Details of  
34 this procedure and the validity of the assessments have been described by Otto.[23]  
35  
36  
37  
38  
39  
40  
41  
42

43 Problematic alcohol use was dichotomized (yes vs. no, with yes defined as one or more of  
44 consumption of  $\geq 210$  g pure alcohol per week, having ever taken an ‘eye-opener’, being  
45 intoxicated often, having been taking into custody for public drunkenness on at least one  
46 occasion, and non-prescription drug (ever vs. never). Drug misuse was coded (yes vs. no), with  
47 yes defined as used illicit drugs 10 times or more or any intravenous drug use.  
48  
49  
50  
51  
52  
53

#### 54 **Measures of alcohol and drug misuse and suicide attempt**

55  
56  
57  
58  
59  
60

1  
2  
3 Data from the National Swedish inpatient register were used to identify inpatient care with an  
4 alcohol or drug diagnosis of dependence or abuse according to ICD-8 and ICD-9 from 1987 and  
5 ICD-10 from 1997 onwards.  
6  
7

8  
9 The register includes details concerning inpatient care stays and days at hospital and diagnoses,  
10 and has covered all public hospitals in Stockholm and Uppsala County since 1972, 85% of all  
11 Swedish public inpatient care stays since 1983, and about 98–99% since 1987. The ICD  
12 classifications for hospitalization and mortality were: Drug misuse – ICD-8: 304 and 965.0; ICD-  
13 9: 304, 965A, 968F, 969G and 969H; and ICD-10: F11-12, F14, F15, F16, F18, F19, O35.5,  
14 P04.4, T40.0–T40.3, T40.5–T40.9, T43.6, Z71.5, and X42. Alcohol misuse – ICD-8: 291, 303,  
15 571.00, 571.01 and 980; ICD-9: 291, 303, 305A, 357F, 425F, 535D, 571A–571D and 980; and  
16 ICD-10: E24.4, F10, G31.2, G62.1, G72.1, I42.6, K29.2, K70, K86.0, O35.4, P04.3, Q86.0, T51,  
17 X45, Y91, Z50.2 and Z71.4. Suicide attempt: ICD-8 and ICD- 9: Determined suicide attempt:  
18 E950-E959 and undetermined E980-E989; ICD-10: Determined X60-X84 and undetermined  
19 suicide attempt: Y10-Y34.  
20  
21  
22  
23  
24  
25  
26  
27  
28  
29  
30  
31  
32  
33

### 34 **Suicide**

35  
36 Information about suicide was obtained from Cause of Death Register which provides mortality  
37 data and covers more than 99% of all deaths occurring in Sweden and is based on information  
38 from death certificates. Suicide was classified according to ICD-8 and ICD-9: E950-E959 and  
39 ICD-10: X60-X84 or as death with undetermined intent ICD-8 and ICD-9: E980-E989 and ICD-  
40 10: Y10-Y34. The same ICD-codes as for the hospital register.  
41  
42  
43  
44  
45  
46

### 47 **Measurement of crime**

48  
49 Data from the National Crime Register were used to identify date, type, and number of criminal  
50 offenses. The Crime Register contains information on all convictions in Sweden from 1966 and  
51 onwards. Criminality was divided in three categories: no crime, violent crime and non-violent  
52 crime. Violence was defined as: homicide, manslaughter and assault and non-violent crime all the  
53  
54  
55  
56  
57  
58  
59  
60

1  
2  
3 other convictions. We also categorized the cohort according to number of crimes meaning for  
4  
5 violent and non-violent offenders: (0, 1, and 2 or more crimes).

6  
7 Information about alcohol and drug inpatient-care, criminality and suicide was linked at  
8  
9 Statistics Sweden (Statistiska Centralbyrån) via the unique personal number for each individual in  
10  
11 the cohort. This personal number was then replaced with an individual serial number making the  
12  
13 data anonymous to the research group, after approval of Regional ethical review board in  
14  
15 Stockholm.

### 16 17 18 **Statistical analyses**

19  
20 Cox proportional bivariate and multivariate regression analysis was used to calculate hazard ratios  
21  
22 (HRs) with 95% confidence intervals (95% CI) for violent and non-violent criminality and  
23  
24 suicide. We adjusted for confounders measured at conscription in relation to time to suicide. The  
25  
26 surveillance time was calculated from September 1969 until death or until 31 December 2004 for  
27  
28 all subjects in the cohort.

29  
30 We had no exact information whether a person had emigrated from Sweden or not during the  
31  
32 follow-up period, therefore we could not censor for emigration in the calculation of person time.

33  
34 In order to investigate the association between the number of criminal offences and mortality, we  
35  
36 categorized subjects according to committed numbers of offences (0, 1, 2 and more) in relation to  
37  
38 the time to suicide by using Cox proportional regression analysis. These were measured at the  
39  
40 time of conscription and only measured once why the time order was difficult to prove. Some of  
41  
42 these variables like alcohol- or substance use could act as confounders or mediators on both  
43  
44 criminality and suicide.

45  
46 A test of the proportional hazard assumption was performed for each confounder (X) in bivariate  
47  
48 and multivariate analyses by using a time-dependent explanatory variable in the model ( $X \cdot (\log$   
49  
50  $\text{time} - \text{average value of the log time})$ ). If the p-value was significant ( $p < .05$ ) the proportional  
51  
52 hazard assumption was not fulfilled and the variable was not included in the analyses.  
53  
54  
55  
56  
57  
58  
59  
60

1  
2  
3  
4  
5 We used Kaplan-Meier survival curves to plot survival probability of suicide in non-criminals,  
6  
7 violence and other criminality during the 35 years follow-up.  
8

9  
10 Chi-square ( $X^2$ ) test was used when calculating early confounders and hospitalization in relation  
11  
12 to criminality.  
13

## 14 15 16 **RESULTS**

17  
18 Of the total cohort, 2,671 subjects (5.5%) died during the follow-up period. Of these 615 (23.6%)  
19  
20 died due to suicide (474 determined and 141 undetermined). Suicide was more prevalent in the  
21  
22 criminal groups: no criminality (4.11%), non-violent (7.3%) and violent criminality (13.7%).  
23

24  
25 The suicide cases were rather equally distributed throughout the 35 years follow-up period.  
26

27  
28 More than one third (34%) of the suicide cases were 30 years or younger, 30% were in the age  
29  
30 category 31-40 years and the remaining subjects (36%) were 41 years or older. The mean age was 36  
31  
32 years.  
33

34  
35 Table 1 shows the distribution of 11 confounders measured at conscription divided into the three  
36  
37 groups of criminals. All risk factors differed significantly ( $p < 0.0001$ ) between the groups, but mostly  
38  
39 prior contact with the police or juvenile authorities, and having had conducted problems at school.  
40

41  
42 Regarding hospitalization of alcohol or drug misuse which had occurred during the follow-up period,  
43  
44 alcohol misuse differed most significantly between the groups.  
45

### 46 **Methods of suicide**

47  
48 Poisoning was the most prevalent method of suicide ( $n=278$ ) followed by hanging and suffocation  
49  
50 ( $n=149$ ) (Table 2). The violent offenders had nearly seven times higher hazard to die from poisoning  
51  
52 ( $HR=6.92$ , 95%CI 4.91-9.76), while the non-violent criminal group had almost three times higher  
53  
54 risk ( $HR=2.94$ , 95%CI 2.26-3.81). The violent group had three times higher hazard ratio to die due to  
55  
56 shooting by firearm, while the non-violent group had no significant risk.  
57  
58  
59  
60

### Crude and multivariate analyses

Violent related criminality had the highest hazard ratio for suicide (HR=4.69, 95%CI 3.56-6.19) followed by non-violent criminality (HR=2.08, 95%CI 1.72-2.52) in bivariate analyses. After adjustment for multiple confounders, the hazard ratios decreased to nearly three (HR=2.68) and two fold (HR=1.65) respectively (Table 3). Four out of 11 of the confounders in the model e.g. low emotional control (HR=1.4), low intellectual capacity (1.36), own medication for psychiatric problems (HR=1.40) and medication for nervous problem in the family (HR=1.23) were significantly associated with suicide. In the fully adjusted model we also included alcohol and drug inpatient care stays and suicide attempt and found elevated hazard ratios, however, only significant in non-violent offenders (HR=1.35, 95%CI 1.10-1.67). All these three inpatient-care variables were associated with suicide: suicide attempt carried an hazard of 4.83, while alcohol and drug misuse had lower hazards (2.00 and 1.74, respectively).

### Repeated violent and non-violent offenders in relation to suicide

Both repeated non-violent and violent offences were associated with elevated hazard ratios of suicide in crude analyses (HR=3.27 and HR=5.40). When adjusted for early confounders the repeaters of both violent and non-violent offenders decreased to HRs=2.42 and 2.24, respectively (Table 4).

We conducted Kaplan-Meier survival distribution curves for the three criminal groups in relation to suicide from 1970 up to 2004. We found that violent criminality was associated with lower survival (Fig 1).

### DISCUSSION

One aim of this study was to analyse the association between male violent and non-violent offending and risk for suicide in a population-based cohort during a 35-years follow-up.



1  
2  
3 A main finding was that nearly one third of the death cases were due to suicide in those who had  
4  
5 ever committed a violent offence and one fourth in the non-violent group. This is in line with  
6  
7 earlier studies reporting high proportionate mortality among homicide offenders and among  
8  
9 personality-disordered offenders subject to forensic psychiatric assessment.[28-30]  
10

11  
12 Another main finding was that violent offenders had nearly five times higher crude risk and non-  
13  
14 violent offenders more than two-fold higher risk for suicide compared to non-criminals. Even after  
15  
16 controlling for multiple confounders measured at conscription the hazard ratios remained  
17  
18 significant. Alcohol and substance misuse and attempted suicide in the fully adjusted model were  
19  
20 confounding on suicide and only association between non-violent offending and suicide remained  
21  
22 significant. This implies a strong association between these clinical predictors and suicide  
23  
24 risk.[11,31] However, we do not have knowledge about the time order between criminality and the  
25  
26 clinical factors measured during the follow-up period, why we have to take the results with  
27  
28 cautions.  
29  
30

31  
32 There is some evidence in the literature that violent criminals have higher rates of suicide, but  
33  
34 these numbers are often derived from prison populations with often difficult circumstances such as  
35  
36 overcrowded cells and spaces.[32] Very few earlier studies on the association between violent and  
37  
38 non-violent criminality and suicide have been conducted in a cohort representing the general  
39  
40 population and with a long follow-up period. However, national data from England and Wales  
41  
42 found after age standardization, 9- to 13-fold increased risk for suicide in both prisoners and non-  
43  
44 custody offenders.[32]  
45  
46

47  
48 We found the suicide cases were rather equally distributed throughout the 35 years follow-up  
49  
50 period which probably means that all age categories seem to be vulnerable for suicide. Other  
51  
52 studies have shown that the yearly incidence rates of suicide have not shown a clear decrease in  
53  
54 the younger age categories in Sweden, why it is important to identify delinquency at young ages  
55  
56 and other risk factors in order to find preventive strategies for this group.[5] Generally, suicide  
57  
58  
59  
60

1  
2  
3 rates are higher among the older age groups, often due to loneliness, anxiety disorder and  
4  
5 depression.[33-34]

6  
7 Another finding was that poisoning as method of completed suicide was most prevalent in violent  
8  
9 and non-violent criminals, while hanging was the most prevalent method among non-criminals.

10  
11 That was also the case for men in the whole of Sweden.[35] In a Danish national register study of  
12  
13 9708 suicide cases and 188,134 age and gender matched living controls, hanging was the leading  
14  
15 suicide method among men, while poisoning among women.[36-37] One possible explanation to  
16  
17 the high prevalence of poisoning in criminals in our study could be that alcohol and substance use  
18  
19 was more prevalent in the criminal groups including fatal and non-fatal poisonings compared to  
20  
21 non-criminals.  
22  
23

#### 24 25 **Suicide attempt and alcohol misuse**

26  
27 We found that one third of the violent offenders were already diagnosed at conscription with a  
28  
29 psychiatric diagnosis. Psychiatric disorders are strongly related to suicide risk, whereas the  
30  
31 association between mental illness and violent crime is not as evident. King and Barraclough [38]  
32  
33 found 27 times higher risk of unnatural death (suicide, accident and undetermined) among  
34  
35 individuals who had recently been in contact with psychiatric clinics compared to those who had  
36  
37 not. Persons with severe psychiatric disorders like affective disorder and schizophrenia have  
38  
39 highly elevated lifetime suicide risk.[39-40]  
40  
41

42  
43 One out of five suicide victims in this study had attempted suicide, confirming a strong association  
44  
45 between suicide attempt and suicide. This was especially evident for violent offenders where one  
46  
47 in three had attempted suicide. Suicide attempt has been considered as one of the strongest  
48  
49 predictors of suicide and the risk seem to be elevated up to older ages and during long time  
50  
51 periods.[41] In the total cohort, we found that 1192 men (2.4%), had attempted suicide which  
52  
53 could be considered as rather low frequency when comparing with the suicides (n=615). An  
54  
55 American national study (National Survey on Drug Use and Health), based on interviews and  
56  
57  
58  
59  
60

1  
2  
3 web-questionnaires from 92,264 respondents in year 2008 and 2009, found one suicide case for  
4 every 25 attempted suicides.[42] We had data on only suicide attempts needing inpatient care,  
5 namely serious suicide attempts, which could explain the ratio. We did not have data on attempted  
6 suicides that not turn up as hospital records. Some suicide attempters do not search help at any  
7 care givers.[43-44]  
8  
9

10  
11  
12  
13  
14 In the present study, about half of the violent offenders had reported either risky alcohol or  
15 substance use at the time of conscription and nearly one third had been treated at hospital for an  
16 alcohol related diagnosis. Alcohol misuse has also been pointed out as an important risk factor for  
17 suicide and in some studies the second most common diagnostic group.[33,45] Wilcox et al.[16]  
18 found alcohol misusers having a 10-fold increase risk for suicide in a mixed-age cohort. Likewise,  
19 in a longitudinal cohort study by Flensburg-Madsen et al.[45] individuals with alcohol use  
20 disorders had eight times higher hazard ratios of suicide compared to individuals with no alcohol  
21 use. The hazard ratio fell to three after adjustment of psychiatric disorders. These findings indicate  
22 the importance of early detection and prevention strategies and treatment for substance users and  
23 especially those with suicidal tendencies in all ages.[34] The relationship between alcohol use and  
24 violence seems to be complex.[46] The fact that the suicide rate is somewhat higher in the violent  
25 criminals than non-violent criminals, one could assume that alcohol misuse play an important role  
26 for both violence and suicide.[45]  
27  
28  
29  
30  
31  
32  
33  
34  
35  
36  
37  
38  
39  
40  
41  
42

### 43 **Advantages and limitations**

44  
45 An advantage of this study is the large national cohort with a longitudinal design and with several  
46 adolescent confounders. Only a small part 2-3 % of the conscripts was excluded from the study  
47 mainly because of physical or psychiatric disorders. The two questionnaires used at conscription  
48 were non-anonymous, which could have contributed to a lower response rate of especially  
49 problematic issues such as alcohol and substance use. However, other studies on conscription  
50 cohort have compared register and self-reported information of alcohol and substance use and  
51  
52  
53  
54  
55  
56  
57  
58  
59  
60

1  
2  
3 found good agreement between the different sources of data. [24] A small number of the  
4  
5 conscripts missed one or some of the items in the questionnaires. That was especially evident for  
6  
7 those subjects who had committed violent offences whereas the response rate for the confounders  
8  
9 included in the study varied from 0.26 to 9.45%. The corresponding measures for other criminality  
10  
11 and non-criminals were: 0.20 to 6.37% and 0.13 to 4.19%. The violent offenders had probably  
12  
13 more severe risk factors than the non-violent and non-criminal groups which could have resulting  
14  
15 in underestimating of the hazard ratios of suicide. One could assume that these subjects also had  
16  
17 higher rates of substance use and other maladjusted behaviour measured at conscription which in  
18  
19 turn could have affected the outcome.[47] However, we have no reason to believe that the risk for  
20  
21 the outcome, suicide, has been considerable affected due the internal missing data.  
22  
23

24  
25 Another limitation of this study is that we do not have information about criminality not turning  
26  
27 up in the register. Some subjects could have committed many violent and non-violent crimes,  
28  
29 especially in combination with substance misuse, and never been convicted of a crime.  
30

### 31 **Conclusions**

32  
33 We found that individuals registered for either violent or other criminality are at increased risk for  
34  
35 committing suicide and that is especially evident for those who were criminal repeaters. However,  
36  
37 after adjusting for confounders measured at conscription the risk was still elevated and just  
38  
39 slightly significant or non-significant in the fully adjusted model including hospitalization due to  
40  
41 alcohol and substance misuse and suicide attempt. The two criminal groups were more likely to  
42  
43 use poisoning as suicide method indicating prior experiences of substance misuse. Hanging was  
44  
45 most prevalent in the non-criminal group which is in line with the general population in Sweden.  
46  
47 [35] We suggest that authorities and the health care should observe the increased risk for suicide  
48  
49 in both violent and non-violent criminals, especially those with earlier suicide attempt and  
50  
51 comorbid alcohol and substance misuse.  
52  
53  
54  
55  
56  
57  
58  
59  
60

1  
2  
3 **Acknowledgements** We want to thank statistician Anders Leifman for the valuable statistical  
4  
5 advice.

6  
7 **Competing interests:** none.

8  
9 **Funding:** The research for this study was supported by Co-ordination of the Swedish Drug Policy  
10  
11 (Dnr 238/2006:18), by the Swedish Research Council (Project numbers: K2009-61P-21304-04-4;  
12  
13 K2009-61X-21305-01-1) and through the regional agreement on medical training and clinical  
14  
15 research (ALF) between Stockholm County Council and Karolinska Institutet, Stockholm Centre  
16  
17 for Psychiatric Research and Education.

18  
19 **Contributors:** MS planned the study, conducted the statistical analyses and wrote the final  
20  
21 version of the manuscript. AS contributed to the planning and data analyses. JJ and AR  
22  
23 contributed to the planning of the study and preparing of the manuscript. All authors contributed  
24  
25 to the final draft of the manuscript.

26  
27 **Ethics approval:** Regional ethical review board in Stockholm. (Dnr 2007/174-31, Dnr  
28  
29 2008/1086-31/5).

## Reference

1. World Health Organization, World suicide prevention day 2012. <http://www.who.int/mediacentre/events/annual/world-suicide-prevention-day/en/>
1. Bertolote JM, Fleischmann A. A global perspective on the magnitude of suicide mortality. In: D Wasserman and C Wasserman (eds.). *Oxford Textbook of Suicidology and Suicide Prevention: a global perspective*. Oxford: Oxford University Press.2009;91-98.
2. Patton GC, Coffey C, Sawyer SM et al. Global patterns of mortality in young people: a systematic analysis of population health data. *Lancet* 2009;**374**: 881-892.
3. Karimina A, Law MG, Butler TG et al. Suicide risk among recently released prisoners in New South Wales, Australia. *Med J Aust* 2007;**18**:387-390.
4. Fazel S, Benning R, Danesh J. Suicides in male prisoners in England and Wales, 1978-2003. *Lancet* 2005;**366**:1301-2.
5. Webb R, Qin P, Stevens H. National study of suicide in all people with a criminal justice history. *Arch Gen Psychiatr* 2011;**68**,591-9.
6. Hayes LM. National study of jail suicides: seven year later. *Psychiatr Q* 1989;**60**:7-29.
7. Boardman AP, Grimbaldeston AH, Handley C. et. al. The North Staffordshire Suicide Study: a case-control study of suicide in one health district. *Psychol Med* 1999;**29**:27- 33.
8. Linsley KR, Johnson N, Martin J. Police contact within 3 months of suicide and associated health service contact. *Br J Psychiatry* 2007;**190**:170-1.
9. Björkenstam E, Björkenstam C, Vinnerljung B et al. Juvenile delinquency, social background-a Swedish national cohort study of 992881 young adults. *Int J Epidemiol* 2011;**40**:1585-92.
10. Harris EC, Barraclough B. Suicide as an outcome for mental disorders. A meta-analysis. *Br J Psychiatry* 1997;**170**:205-28.

- 1  
2  
3 11. Tidemalm D, Långström N, Lichtenstein P. et al., Risk of suicide after suicide attempt  
4 according to coexisting psychiatric disorder: Swedish cohort study with long term follow-up. BMJ  
5 2008;**337**:a2205doi:10.1136/bmj.a2205.  
6  
7
- 8  
9 12. Runeson B, Tidemalm D, Dahlin M et al. Method of attempted suicide as predictor of  
10 subsequent successful suicide: national long term cohort study. BMJ 2010;  
11  
12 **340**:c3222doi:10.1136/bmj.c3222.  
13  
14
- 15 13. Stenbacka M, Moberg T, Romelsjö A et al. Mortality and causes of death among violent  
16 offenders and victims - a Swedish population based longitudinal study. BMC public health  
17 2012;**12**:1-10.  
18  
19
- 20 14. Darke S, Douflou J, Torok M. Toxicology and circumstances of completed  
21 suicide by means other than overdose. J Forensic Sci 2009;**54**:490-4.  
22  
23
- 24 15. Darke S, Dufrou J, Totok M. Toxicology and characteristics of fatal oxycodone toxicity cases  
25 in New South Wales, Australia 1999-2008. J Forensic Sci 2011;**56**:690-3.  
26  
27
- 28 16. Wilcox HC, Conner KR, Caine ED. Association of alcohol and drug use disorders and  
29 completed suicide: an empirical review of cohort studies. Drug Alc Depend 2004;**7**:11-19.  
30  
31
- 32 17. Allebeck P, Allgulander C, Fisher LD. Predictors of completed suicide in a cohort of 50465  
33 young men: role of personality and deviant behaviour. BMJ 1988;**297**:176-178.  
34  
35
- 36 18. Andreasson S, Allebeck P, Romelsjö A. Alcohol and mortality among young men.  
37 Longitudinal study of Swedish conscripts. Br Med J 1988;**296**:1021-5.  
38  
39
- 40 19. Eriksson A, Romelsjö A, Stenbacka M. et al. Early risk factors for criminal offending in  
41 schizophrenia: a 35-year longitudinal cohort study. Soc Psychiatr Epidemiol. 2011 **46**:925-32.  
42  
43
- 44 20. Stenbacka M, Leifman L, Dalal K, et al.. Early Predictors of Injury Mortality among Swedish  
45 Conscripts:A 35-Year Follow-up Study. Accid Anal Prev 2011;**43**:228-34.  
46  
47
- 48 21. Davstad I, Allebeck P, Leifman A et al. Self-reported drug use and mortality among a  
49 nationwide sample of Swedish conscripts – A 35-year follow-up. Drug Alc Depend 2011;  
50  
51  
52  
53  
54  
55  
56  
57  
58  
59  
60

- 1  
2  
3 22. Uppmark M, Karlsson G, Romelsjö A. Drink driving and criminal behaviours as risk factors  
4 for receipt of disability pension and sick leave: a prospective study of young men. *Addiction*  
5 94:507-19. **118**:383-90.  
6  
7  
8  
9  
10 23. Otto U: Male youths. A sociopsychiatric study of a total annual population of Swedish  
11 adolescent boys. *Acta Psychiatr Scand* 1976;Suppl **264**:1-312.  
12  
13 24. Benson G, Holmberg MB: Validity of questionnaire in population studies on drug use. *Acta*  
14 *Psychiatr Scand* 1985;**70**:9-18.  
15  
16 25. Rydelius P-A. Alcohol-abusing teenage boys. *Acta Psychiatr Scand* 1983;**68**:368-80.  
17  
18 26. Ståhlberg B. I-provet (intelligence test: the Swedish enlistment battery). Karlstad.  
19 *Militärpsykologiska Institutet*. 1971. (In Swedish)  
20  
21 27. David AS, Malmberg L, Brandt L et al. 1997. IQ and risk for schizophrenia: a population-  
22 based cohort study. *Psychol Med* 1997;**27**:1311-23.  
23  
24 28. Kullgren G, Tengström A, Grann M. Suicide among personality-disordered offenders: a  
25 follow-up study of 1943 male criminal offenders. *Psychiatr Epidemiol* 1998;**33**:102-6.  
26  
27 29. Jokinen J, Forslund K, Nordström AL et al. Suicide risk after homicide in Sweden. *Arch*  
28 *Suicide Res* 2009; **13**:297-301.  
29  
30 30. Jokinen J, Forslund K, Ahnemark E et al. Karolinska Interpersonal Violence Scale predicts  
31 suicide in suicide attempters. *J Clin Psychiatry* 2010; **71**:1025-1032.  
32  
33 31. Waern M. Risk factors for suicide in the elderly: What do we know? What do we need to find  
34 out? *Suicidologi* 2011;**16**:2:3-8.  
35  
36 32. Sattar G. Rates and causes of death among prisoners and offenders under community  
37 supervision. Home Office Research Study. London Home Office. 2001;231.  
38  
39 33. Waern M. Alcohol dependence and abuse in elderly suicides. *Alcohol and Alcoholism*  
40 2003;**38**:249-254.  
41  
42  
43  
44  
45  
46  
47  
48  
49  
50  
51  
52  
53  
54  
55  
56  
57  
58  
59  
60



- 1  
2  
3 34. Whiteford HA, Degenhardt L, Rehm J et al. Global burden of disease attributable to mental  
4 and substance use disorders: findings from the Global Burden of Disease Study 2010.  
5 Lancet 2013;28. doi:pii: S0140-6736(13)61611-6. 10.1016/S0140-6736(13)61611-6.  
6  
7  
8  
9  
10 35. National Board on Health and Welfare, The Cause of Death Register, 2012.  
11  
12 36. Webb RT, Qin P, Stevens H, Shaw J, Appleby L, Mortensen PB. National study of suicide  
13 method in violent criminal offenders. J Affect Disord 2013; [http://dx.doi.org/  
14 10.1016/j.jad.2013.04.001].  
15  
16  
17  
18 37. Titelman D, Oskarsson H, Wahlbeck K et al. Suicide mortality trends in the Nordic countries  
19 1980–2009. Nord J Psychiatry 2013;1–10.23293897.  
20  
21  
22  
23 38. King E, Barraclough B. Violent death and mental illness: A study of a single catchment area  
24 over eight years. Br J Psychiatry 1990;156:714-20.  
25  
26  
27  
28 39. Carlborg A, Winnerbäck K, Jönson EG. et al. Suicide in schizophrenia. Expert Review of  
29 Neurotherapeutics 2010;10,1153–1164.  
30  
31  
32 40. Nordentoft M, Mortensen PB, Pedersen CB. Absolute risk of suicide after first hospital contact  
33 in mental disorder. Arch Gen Psychiatry. 2011;68(10):1058-64.  
34  
35  
36  
37 41. Suominen K, Isometsa E, Suokas J et al. Completed suicide after a suicide attempt: a 37-year  
38 follow-up study. Am J Psychiatry 2004;161:562-563.  
39  
40  
41 42. Crosby AE, Han B, Ortega LAG et al. Suicidal thoughts and behaviors among adults aged ≥18  
42 years-United States, 2008-2009. MMWR Surveillance Summaries 2011;60(no. SS-13).  
43  
44  
45 43. Guilherme B, Jules A, Nock MK et al. Risk factors for twelve-month suicide attempts in the  
46 National Comorbidity Survey Replication (NCS-R). Psychol Med 2006;36:1747–57.  
47  
48  
49 44. De Leo D, Ester C, Kym S et al. Lifetime risk of suicide ideation and attempts in an Australian  
50 community: Prevalence, suicidal process, and help-seeking behaviour. 2005;86:215–24.  
51  
52  
53  
54  
55  
56  
57  
58  
59  
60

- 1  
2  
3 45. Flensburg-Madsen T, Knop J, Mortensen EL et al. Alcohol use disorders increase the risk of  
4 completed suicide—Irrespective of other psychiatric disorders. A longitudinal cohort study.  
5  
6  
7 Psychiatry Research 2009;**167**:123–130.  
8
- 9  
10 46. Lipsey MW, Wilson DB, Cohen MA, Derzon JH: Is there a causal relationship between  
11 alcohol use and violence? A synthesis of evidence. Recent Dev Alcohol 1997;**13**:245-82.  
12
- 13  
14 47. Stattin H, Romelsjö R, Stenbacka M. Personal resources as modifiers of the risk for future  
15 criminality: an analysis of protective factors in relation to 18-year-old boys. Br J Criminol  
16  
17 1997;**37**:198–223.  
18  
19  
20  
21  
22  
23  
24  
25  
26  
27  
28  
29  
30  
31  
32  
33  
34  
35  
36  
37  
38  
39  
40  
41  
42  
43  
44  
45  
46  
47  
48  
49  
50  
51  
52  
53  
54  
55  
56  
57  
58  
59  
60

Table 1. Baseline characteristics and hospitalization in relation to non-violent and violent criminality

|                                               | No crime      | Non-violent criminality | Violent criminality | Chisq, prob. **)  |
|-----------------------------------------------|---------------|-------------------------|---------------------|-------------------|
| Fathers' social class                         |               |                         |                     |                   |
| III                                           | 15433 (47.67) | 7146 (50.38)            | 1321(58.07)         |                   |
| I-II                                          | 15680 (48.43) | 6133 (43.24)            | 739(32.48)          | 204.72,p<0.0001   |
| Missing *)                                    | 1262 ( 3.90)  | 904 (6.37)              | 215(9.45)           |                   |
| Medication for nervous problems in the family |               |                         |                     |                   |
| Yes (parents or other family members)         | 9747(30.11)   | 4897(34.53)             | 918(40.35)          |                   |
| No                                            | 21698(67.02)  | 8738(61.61)             | 1231(54.11)         | 201.34, p<0.0001  |
| Missing                                       | 931(2.88)     | 548(3.86)               | 126(5.54)           |                   |
| Conduct problems at school                    |               |                         |                     |                   |
| Yes (at least once)                           | 5726 (17.69)  | 4743 (33.44)            | 1188 (52.22)        |                   |
| No                                            | 26352 (81.39) | 9226 (65.05)            | 1034 (45.45)        | 2470.41, p<0.0001 |
| Missing                                       | 298 (0.92)    | 214 (1.51)              | 53(2.33)            |                   |
| Taken medication for psychiatric problems     |               |                         |                     |                   |
| Yes                                           | 3217(9.94)    | 1858(13.10)             | 456(20.04)          |                   |
| No                                            | 28821(89.02)  | 12087(85.22)            | 1757(77.23)         | 293,35, p<0.0001  |

|                                                 |               |               |              |                   |
|-------------------------------------------------|---------------|---------------|--------------|-------------------|
| Missing                                         | 338(1.04)     | 238(1.68)     | 62(2.73)     |                   |
| Emotional control                               |               |               |              |                   |
| Very bad, bad                                   | 8677 (26.8)   | 4941(34.84)   | 1135(49.89)  |                   |
| Very good, good,<br>medium                      | 23471(72.6)   | 9094(64.12)   | 1097 (48.22) | 769.81, p<0.0001  |
| Missing                                         | 228(0.70)     | 148(1.04)     | 43(1.89)     |                   |
| Intellectual capacity (IQ)                      |               |               |              |                   |
| Below average                                   | 5190 (16.03)  | 3296(23.24)   | 812(35.69)   |                   |
| Above average, average                          | 27145(83.84)  | 10859(76.56)  | 1457(64.04)  | 764.81,p<0.0001   |
| Missing                                         | 41(0.13)      | 28(0.20)      | 6 (0.26)     |                   |
| Psychiatric diagnosis (at<br>conscriptioin)     |               |               |              |                   |
| Yes (at least one<br>diagnosis)                 | 3151 (9.73)   | 2251 (15.87)  | 679 (29.85)  |                   |
| No                                              | 28679 (88.58) | 11639 (82.06) | 1559 (68.53) | 1008.59, p<0.0001 |
| Missing                                         | 546 (1.69)    | 293 (2.07)    | 37(1.63)     |                   |
| Contact with police and<br>juvenile authorities |               |               |              |                   |
| Yes (several or some<br>times)                  | 6726 (20.77)  | 5585 (39.38)  | 1458 (64.09) |                   |
| No                                              | 25208 (77.86) | 8314 (58.62)  | 754 (33.14)  | 3305.72, p<0.0001 |
| Missing                                         | 442 (1.37)    | 284 (2.00)    | 63 (2.77)    |                   |
| Risky alcohol use                               |               |               |              |                   |
| Yes                                             | 2683 (8.29)   | 2807(19.79)   | 901(39.60)   |                   |

|                                         |              |              |             |                    |
|-----------------------------------------|--------------|--------------|-------------|--------------------|
| No                                      | 29279(90.43) | 11119(78.40) | 1310(57.58) | 2681.86, p<0.0001  |
| Missing                                 | 414(1.28)    | 257(1.81)    | 64(2.91)    |                    |
| Dug misuse                              |              |              |             |                    |
| Yes                                     | 585 (1.81)   | 919(6.48)    | 248(10.9)   |                    |
| No                                      | 30410(94.00) | 12533(88.37) | 1864(81.93) | 1063, 23, p<0.0001 |
| Missing                                 | 1381(4.27)   | 731(5.15)    | 163(7.16)   |                    |
| Sniffing                                |              |              |             |                    |
| At least once                           | 3187(9.84)   | 2614(18.43)  | 673(29.58)  |                    |
| No                                      | 28756(88.82) | 11259(79.38) | 1520(66.81) | 1234.54, p<0.0001  |
| Missing                                 | 433(1.34)    | 310(2.19)    | 82(3.60)    |                    |
| <b>Hospitalization</b>                  |              |              |             |                    |
| Alcohol hospitalization                 |              |              |             |                    |
| Yes (at least once)                     | 571(1.76)    | 1524(10.75)  | 727(31.96)  |                    |
| No                                      | 31805(98.24) | 12659(89.25) | 1548(68.04) | 4464.28, p<.00001  |
| Drug use hospitalization                |              |              |             |                    |
| Yes (at least once)                     | 50,(0.15)    | 352(2.48)    | 265(11.65)  |                    |
| No                                      | 32326(99.85) | 13831(97.52) | 2010(88.35) | 2269.25, p<.00001  |
| Hospitalization for<br>suicide attempts |              |              |             |                    |
| Yes (at least once)                     | 303(0.94)    | 581(4.10)    | 308 (13.54) |                    |
| No                                      | 32073(99.06) | 13602(95.90) | 1967(86.46) | 1647.76, p<0.0001  |

\*) No answers were given to this item

\*\* ) p-value calculated for non-missing observations

1  
2  
3  
4  
5  
6  
7  
8  
9  
10  
11  
12  
13  
14  
15  
16  
17  
18  
19  
20  
21  
22  
23  
24  
25  
26  
27  
28  
29  
30  
31  
32  
33  
34  
35  
36  
37  
38  
39  
40  
41  
42  
43  
44  
45  
46  
47  
48  
49  
50  
51  
52  
53  
54  
55  
56  
57  
58  
59  
60

| Table 2. Suicide methods related to violent and non-violent criminality. Cox proportional regression analyses. |                   |                   |
|----------------------------------------------------------------------------------------------------------------|-------------------|-------------------|
| Methods of suicide                                                                                             | Crime             | HR , 95% CI       |
| Poisoning (n=278):<br>E950-E952, E980-E982, X60-X69, Y10-Y19                                                   | No crime          | 1.0               |
|                                                                                                                | Non-violent crime | 2.94, 2.26-3.81   |
|                                                                                                                | Violent crime     | 6.92, 4.91-9.76   |
| Hanging/suffocation (n=149): E953, E983, X70, Y20                                                              | No crime          | 1.0               |
|                                                                                                                | Non-violent crime | 1.28, 0.90-1.83   |
|                                                                                                                | Violent crime     | 2.54, 1.47-4.40   |
| Firearm (n=69):<br>E955,E985, X722-X74, Y422-Y424                                                              | No crime          | 1.0               |
|                                                                                                                | Non-violent crime | 1.39, 0.83-2.34   |
|                                                                                                                | Violent crime     | 3.08, 1.44-6.60   |
| Drowning (n=41):<br>E954, E984, X71,Y21                                                                        | No crime          | 1.0               |
|                                                                                                                | Non-violent crime | 1.62, 0.82-3.20   |
|                                                                                                                | Violent crime     | 5.17, 2.19-12.24  |
| Jump from heights (n=27):<br>E957, E987, X80, Y30                                                              | No crime          | 1.0               |
|                                                                                                                | Non-violent crime | 3.23, 1.43-7.26   |
|                                                                                                                | Violent crime     | 4.41, 1.21-16.00  |
| Moving train (n=22):<br>E9580, E9880, X81, Y31                                                                 | No crime          | 1.0               |
|                                                                                                                | Non-violent crime | 2.07, 0.84- 5.10  |
|                                                                                                                | Violent crime     | 4.40, 1.21- 15.98 |
| Cutting (n=16):<br>E956, E986,X79,Y28                                                                          | No crime          | 1.0               |
|                                                                                                                | Non-violent crime | 4.61, 1.58-13.50  |
|                                                                                                                | Violent crime     | 2.95, 0.35-25.23  |
| Others (n=13):<br>E958-959,E988-989, X75-X77, X79, X82-X84, Y425-Y27, Y29, Y32-Y34                             | No crime          | 1.0               |
|                                                                                                                | Non-violent crime | 2.32, 0.67-8.01   |
|                                                                                                                | Violent crime     | 8.99, 2.15-37.63  |

1  
2  
3  
4  
5  
6  
7  
8  
9  
10  
11  
12  
13  
14  
15  
16  
17  
18  
19  
20  
21  
22  
23  
24  
25  
26  
27  
28  
29  
30  
31  
32  
33  
34  
35  
36  
37  
38  
39  
40  
41  
42  
43  
44  
45  
46  
47  
48  
49  
50  
51  
52  
53  
54  
55  
56  
57  
58  
59  
60

| Table 3. Criminality in relation to suicide adjusted for early risk factors measured at conscription <sup>1)</sup> and in addition adjusted for alcohol and drug inpatient and suicide attempt <sup>2)</sup> . |                |              |                 |                           |                           |
|----------------------------------------------------------------------------------------------------------------------------------------------------------------------------------------------------------------|----------------|--------------|-----------------|---------------------------|---------------------------|
| Suicide                                                                                                                                                                                                        |                |              |                 |                           |                           |
| N=615                                                                                                                                                                                                          |                |              |                 |                           |                           |
| Criminality                                                                                                                                                                                                    | No. of exposed | No. of cases | HR Crude        | HR Adjusted <sup>1)</sup> | HR Adjusted <sup>2)</sup> |
| Never                                                                                                                                                                                                          | 32376          | 275          | 1.0             | 1.0                       | 1.0                       |
| Non-violent                                                                                                                                                                                                    | 14183          | 252          | 2.08, 1.72-2.52 | 1.65, 1.35- 2.01          | 1.35, 1.10- 1.67          |
| Violent                                                                                                                                                                                                        | 2275           | 88           | 4.69, 3.56-6.19 | 2.68, 1.98-3.64           | 1.30, 0.92-1.82           |

<sup>1)</sup> adjusted for fathers' social class, medication for nervous problems in the family, conduct problems at school, own medication for psychiatric disorder, contact with police and juvenile authorities, emotional control, intellectual capacity, psychiatric diagnosis at conscription, sniffing of solvents, risky alcohol misuse and substance misuse. <sup>2)</sup> In addition adjusted for alcohol and drug inpatient and suicide attempt.

1  
2  
3  
4  
5  
6  
7  
8  
9  
10  
11  
12  
13  
14  
15  
16  
17  
18  
19  
20  
21  
22  
23  
24  
25  
26  
27  
28  
29  
30  
31  
32  
33  
34  
35  
36  
37  
38  
39  
40  
41  
42  
43  
44  
45  
46

| Table 4. Violent and non-violent offences and suicide. Bivariate and multivariate Cox proportional regression analyses. |                 |                           |                           |
|-------------------------------------------------------------------------------------------------------------------------|-----------------|---------------------------|---------------------------|
| SuicideN=615                                                                                                            |                 |                           |                           |
| Criminality                                                                                                             | HR Crude        | HR Adjusted <sup>1)</sup> | HR Adjusted <sup>2)</sup> |
| Non-violent offence                                                                                                     |                 |                           |                           |
| 0 offence (n=32376, 66.30%)                                                                                             | 1.0             | 1.0                       | 1.0                       |
| 1 offence (n=7322, 14.99%)                                                                                              | 1.46, 1.15-1.85 | 1.25, 0.96-1.63           | 1.18, 0.91-1.55           |
| 2+ offences (n=9136, 18.71%)                                                                                            | 3.27, 2.75-3.88 | 2.24, 1.81-2.77           | 1.49, 1.17-1.89           |
| Violent offence                                                                                                         | HR Crude        | HR Adjusted <sup>1)</sup> | HR Adjusted <sup>2)</sup> |
| 0 offence (n=46559, 95.34%)                                                                                             | 1.0             | 1.0                       | 1.0                       |
| 1 offence (n=1556, 3.19%)                                                                                               | 2.65, 1.96-3.58 | 1.83, 1.29-2.59           | 1.17, 0.82-1.67           |
| 2+ offence (n=719, 1.47%)                                                                                               | 5.40, 3.94-7.39 | 2.42, 1.61-2.59           | 0.84, 0.54-1.31           |

47 <sup>1)</sup> adjusted for fathers' social class, medication for nervous problems in the family, conduct  
48 problems at school, own medication for psychiatric disorder, contact with police and juvenile  
49 authorities, emotional control, intellectual capacity, psychiatric diagnosis at conscription, sniffing  
50 of solvents, risky alcohol misuse and substance misuse. <sup>2)</sup> In addition adjusted for alcohol and  
51 drug inpatient and suicide attempt.  
52  
53  
54  
55  
56  
57  
58  
59  
60



1  
2  
3  
4  
5  
6  
7  
8  
9  
10  
11  
12  
13  
14  
15  
16  
17  
18  
19  
20  
21  
22  
23  
24  
25  
26  
27  
28  
29  
30  
31  
32  
33  
34  
35  
36  
37  
38  
39  
40  
41  
42  
43  
44  
45  
46  
47  
48  
49  
50  
51  
52  
53  
54  
55  
56  
57  
58  
59  
60

For peer review only

1  
2  
3  
4  
5  
6  
7  
8  
9  
10  
11  
12  
13  
14  
15  
16  
17  
18  
19  
20  
21  
22  
23  
24  
25  
26  
27  
28  
29  
30  
31  
32  
33  
34  
35  
36  
37  
38  
39  
40  
41  
42  
43  
44  
45  
46  
47  
48  
49  
50  
51  
52  
53  
54  
55  
56  
57  
58  
59  
60

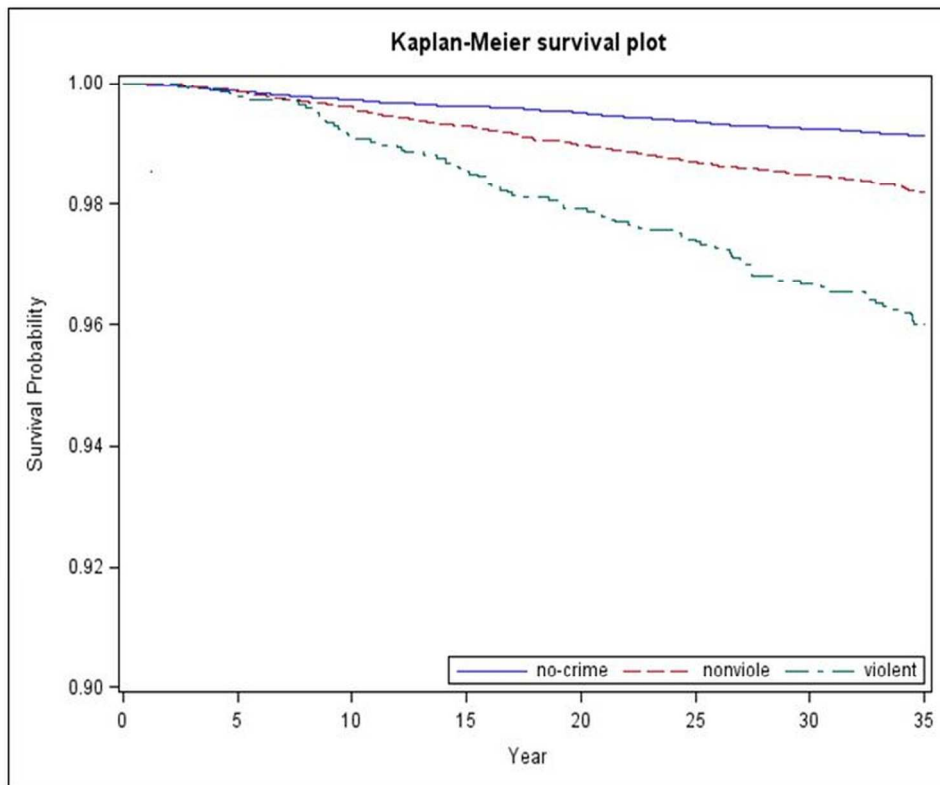

Fig 1. Kaplan-Meier survival plot for suicide in violent and non-violent criminals

101x90mm (300 x 300 DPI)

only

STROBE 2007 (v4) Statement—Checklist of items that should be included in reports of *cohort studies*

| Section/Topic                | Item # | Recommendation                                                                                                                                                                       | Reported on page # |
|------------------------------|--------|--------------------------------------------------------------------------------------------------------------------------------------------------------------------------------------|--------------------|
| Title and abstract           | 1      | (a) Indicate the study's design with a commonly used term in the title or the abstract                                                                                               | 1                  |
|                              |        | (b) Provide in the abstract an informative and balanced summary of what was done and what was found                                                                                  | 2                  |
| <b>Introduction</b>          |        |                                                                                                                                                                                      |                    |
| Background/rationale         | 2      | Explain the scientific background and rationale for the investigation being reported                                                                                                 | 4                  |
| Objectives                   | 3      | State specific objectives, including any prespecified hypotheses                                                                                                                     | 5                  |
| <b>Methods</b>               |        |                                                                                                                                                                                      |                    |
| Study design                 | 4      | Present key elements of study design early in the paper                                                                                                                              | 5                  |
| Setting                      | 5      | Describe the setting, locations, and relevant dates, including periods of recruitment, exposure, follow-up, and data collection                                                      | 5                  |
| Participants                 | 6      | (a) Give the eligibility criteria, and the sources and methods of selection of participants. Describe methods of follow-up                                                           | 5                  |
|                              |        | (b) For matched studies, give matching criteria and number of exposed and unexposed                                                                                                  |                    |
| Variables                    | 7      | Clearly define all outcomes, exposures, predictors, potential confounders, and effect modifiers. Give diagnostic criteria, if applicable                                             | 8                  |
| Data sources/<br>measurement | 8*     | For each variable of interest, give sources of data and details of methods of assessment (measurement). Describe comparability of assessment methods if there is more than one group | 6-8                |
| Bias                         | 9      | Describe any efforts to address potential sources of bias                                                                                                                            | 5,14               |
| Study size                   | 10     | Explain how the study size was arrived at                                                                                                                                            | 5                  |
| Quantitative variables       | 11     | Explain how quantitative variables were handled in the analyses. If applicable, describe which groupings were chosen and why                                                         | 8                  |
| Statistical methods          | 12     | (a) Describe all statistical methods, including those used to control for confounding                                                                                                | 8                  |
|                              |        | (b) Describe any methods used to examine subgroups and interactions                                                                                                                  | 8-9                |
|                              |        | (c) Explain how missing data were addressed                                                                                                                                          | 14-15,22           |
|                              |        | (d) If applicable, explain how loss to follow-up was addressed                                                                                                                       | 8-9                |
|                              |        | (e) Describe any sensitivity analyses                                                                                                                                                | 9                  |
| <b>Results</b>               |        |                                                                                                                                                                                      | 14-15              |

|                          |     |                                                                                                                                                                                                                                                                                                                                                                                                               |             |
|--------------------------|-----|---------------------------------------------------------------------------------------------------------------------------------------------------------------------------------------------------------------------------------------------------------------------------------------------------------------------------------------------------------------------------------------------------------------|-------------|
| Participants             | 13* | (a) Report numbers of individuals at each stage of study—eg numbers potentially eligible, examined for eligibility, confirmed eligible, included in the study, completing follow-up, and analysed<br>(b) Give reasons for non-participation at each stage<br>(c) Consider use of a flow diagram                                                                                                               |             |
| Descriptive data         | 14* | (a) Give characteristics of study participants (eg demographic, clinical, social) and information on exposures and potential confounders<br>(b) Indicate number of participants with missing data for each variable of interest<br>(c) Summarise follow-up time (eg, average and total amount)                                                                                                                |             |
| Outcome data             | 15* | Report numbers of outcome events or summary measures over time                                                                                                                                                                                                                                                                                                                                                | 8-9         |
| Main results             | 16  | (a) Give unadjusted estimates and, if applicable, confounder-adjusted estimates and their precision (eg, 95% confidence interval). Make clear which confounders were adjusted for and why they were included<br>(b) Report category boundaries when continuous variables were categorized<br>(c) If relevant, consider translating estimates of relative risk into absolute risk for a meaningful time period | 9-11, 22-26 |
| Other analyses           | 17  | Report other analyses done—eg analyses of subgroups and interactions, and sensitivity analyses                                                                                                                                                                                                                                                                                                                |             |
| <b>Discussion</b>        |     |                                                                                                                                                                                                                                                                                                                                                                                                               |             |
| Key results              | 18  | Summarise key results with reference to study objectives                                                                                                                                                                                                                                                                                                                                                      | 11          |
| <b>Limitations</b>       |     |                                                                                                                                                                                                                                                                                                                                                                                                               | 14          |
| Interpretation           | 20  | Give a cautious overall interpretation of results considering objectives, limitations, multiplicity of analyses, results from similar studies, and other relevant evidence                                                                                                                                                                                                                                    | 11-14       |
| Generalisability         | 21  | Discuss the generalisability (external validity) of the study results                                                                                                                                                                                                                                                                                                                                         |             |
| <b>Other information</b> |     |                                                                                                                                                                                                                                                                                                                                                                                                               |             |
| Funding                  | 22  | Give the source of funding and the role of the funders for the present study and, if applicable, for the original study on which the present article is based                                                                                                                                                                                                                                                 | 11          |

\*Give information separately for cases and controls in case-control studies and, if applicable, for exposed and unexposed groups in cohort and cross-sectional studies.

**Note:** An Explanation and Elaboration article discusses each checklist item and gives methodological background and published examples of transparent reporting. The STROBE checklist is best used in conjunction with this article (freely available on the Web sites of PLoS Medicine at <http://www.plosmedicine.org/>, Annals of Internal Medicine at <http://www.annals.org/>, and Epidemiology at <http://www.epidem.com/>). Information on the STROBE Initiative is available at [www.strobe-statement.org](http://www.strobe-statement.org).
